# Supplementary material for: An unprecedented use for glycerol: chemoselective reducing agent for sulfoxides
Source: Royal Society of Chemistry journal article supplement (doi:10.1039/c3gc36908k), 2013-01-01

# An Unprecedented Use for Glycerol: Chemoselective Reducing Agent for Sulfoxides

Nuria García, Patricia García-García, Manuel A. Fernández-Rodríguez, Daniel García, María R. Pedrosa, Francisco J. Arnáiz, and Roberto Sanz\*

*Departamento de Química, Facultad de Ciencias, Universidad de Burgos, Pza. Misael Bañuelos s/n, 09001-Burgos, Spain*

## Electronic Supplementary Information

### Index

|                                                                                                                  |    |
|------------------------------------------------------------------------------------------------------------------|----|
| General methods.....                                                                                             | 2  |
| General procedures for the reduction of sulfoxides.....                                                          | 3  |
| General procedure for the Mo-catalyzed oxidation of glycerol with bis( <i>p</i> -tolyl)sulfoxide.....            | 4  |
| General procedure for the reduction of sulfoxides using oxidation products from glycerol as reducing agents..... | 4  |
| NMR studies and spectra for the determination of glycerol oxidation products in the process .....                | 5  |
| NMR spectra of products obtained after extraction in Table 2 and Schemes 1, 2 and 3 .....                        | 13 |

**General methods:** All reactions were assembled under air atmosphere unless otherwise noted. All reaction temperatures refer to bath temperatures. All common reagents and solvents were obtained from commercial suppliers and used without any further purification. Non commercially available sulfoxides were prepared by oxidizing the precursor sulfide with  $\text{NaIO}_4$  (1 equiv) or with  $\text{H}_2\text{O}_2$  according to established procedures.<sup>1</sup> Sulfides precursors of 1-(pent-4-enylsulfinyl)benzene and 1-(pent-4-ynylsulfinyl)benzene were synthesized from thiophenol and the corresponding alkyl bromide in the presence of a base. The catalyst,  $\text{MoO}_2\text{Cl}_2(\text{dmf})_2$ , was prepared as previously reported.<sup>2</sup> Solvents were dried by standard methods. TLC was performed on aluminum-backed plates coated with silica gel 60 with  $\text{F}_{254}$  indicator; the chromatograms were visualized under ultraviolet light and/or by staining with a Ce/Mo reagent and subsequent heating. NMR spectra were measured on Varian Mercury-Plus 300 MHz and Varian Inova-400 MHz spectrometers. GC-MS were recorded on an Agilent 6890N/5973 Network GC System, equipped with a HP-5MS column. Products were isolated in greater than 95% purity, as determined by  $^1\text{H}$  NMR spectroscopy<sup>3</sup> and capillary gas chromatography (GC). The microwave heating was performed in a microwave reactor (CEM Discover S-Class) with a single-mode microwave cavity producing continuous irradiation (Temperature measurements were conducted using an IR sensor located below the microwave cavity floor, and reaction times refer to the total hold time at the indicated temperature. The maximum wattage supplied was 300 W).

---

<sup>1</sup> W. L. Xu, Y. Z. Li, Q. S. Zhang and H. S. Zhu, *Synthesis*, 2004, 227.

<sup>2</sup> R. Sanz, J. Escribano, R. Aguado, M. R. Pedrosa, and F. J. Arnáiz, *Synthesis*, 2004, 1629–1632.

<sup>3</sup> Spectroscopical data of the synthesized sulfides were identical to those previously reported: N. García, P. García-García, M. A. Fernández-Rodríguez, R. Rubio, M. R. Pedrosa, F. J. Arnáiz and R. Sanz, *Adv. Synth. Catal.*, 2012, **354**, 321–327.

### General procedures for the reduction of sulfoxides:

**Method A:** A mixture of glycerol (921 mg, 10 equiv.), sulfoxide (1 mmol) and  $\text{MoO}_2\text{Cl}_2(\text{dmf})_2$  (17 mg, 5 mol%) was heated at 170 °C overnight. The reaction mixture was cooled to room temperature and  $\text{Et}_2\text{O}$  (20 mL) and water (20 mL) were added. The layers were separated and the aqueous layer extracted with  $\text{Et}_2\text{O}$  (2 × 20 mL). The combined organic layers were dried over anhydrous  $\text{Na}_2\text{SO}_4$ , filtered, and the solvents were removed under reduced pressure. The corresponding sulfide was obtained in almost pure form without further purification in the yields reported in Table 2.

**Method B:** A mixture of glycerol (921 mg, 10 equiv.), sulfoxide (1 mmol) and  $\text{MoO}_2\text{Cl}_2(\text{dmf})_2$  (9 mg, 2.5 mol%) was heated at 200 °C for 2–4 h. The reaction mixture was cooled to room temperature and  $\text{Et}_2\text{O}$  (20 mL) and water (20 mL) were added. The layers were separated and the aqueous layer extracted with  $\text{Et}_2\text{O}$  (2 × 20 mL). The combined organic layers were dried over anhydrous  $\text{Na}_2\text{SO}_4$ , filtered, and the solvents were removed under reduced pressure. The corresponding sulfide was obtained in almost pure form without further purification in the yields reported in Table 2.

**Method C:** A mixture of glycerol (111 mg, 1.2 equiv.), sulfoxide (1 mmol) and  $\text{MoO}_2\text{Cl}_2(\text{dmf})_2$  (9 mg, 2.5 mol%) in toluene (1 mL) was irradiated in a sealed tube in the microwave cavity at 230 °C for 5 min. The reaction mixture was cooled to room temperature and  $\text{Et}_2\text{O}$  (20 mL) and water (20 mL) were added. The layers were separated and the aqueous layer extracted with  $\text{Et}_2\text{O}$  (2 × 20 mL). The combined organic layers were dried over anhydrous  $\text{Na}_2\text{SO}_4$ , filtered, and the solvents were removed under reduced pressure. The corresponding sulfide was obtained in almost pure form without further purification in the yields reported in Table 2.

**Recycling study:** A mixture of glycerol (92 g, 100 equiv.), bis(*p*-tolyl)sulfoxide (2.3 g, 10 mmol) and  $\text{MoO}_2\text{Cl}_2(\text{dmf})_2$  (90 mg, 2.5 mol%) was heated at 200 °C for 4–6 h. The reaction mixture was cooled to 100 °C and extracted with hot toluene (3 × 50 mL). The combined organic layers were dried over anhydrous  $\text{Na}_2\text{SO}_4$ , filtered, and the solvents were removed

under reduced pressure. Bis(*p*-tolyl)sulfide was obtained in almost pure form without further purification in the yields reported in Scheme 2. The glycerolic phase was reused in the next cycle.

**Using crude glycerol:** A mixture of crude glycerol (2.36 g, ca. 5–8% purity, ca. 2 equiv.), sulfoxide (1 mmol) and  $\text{MoO}_2\text{Cl}_2(\text{dmf})_2$  (9 mg, 2.5 mol%) was heated at 200 °C for 2–7 h in an open flask until complete consumption of the starting material (determined by GC-MS analysis). The reaction mixture was cooled to room temperature and  $\text{Et}_2\text{O}$  (20 mL) and  $\text{H}_2\text{O}$  (20 mL) were added. The layers were separated and the aqueous layer extracted with  $\text{Et}_2\text{O}$  (2 × 20 mL). The combined organic layers were dried over anhydrous  $\text{Na}_2\text{SO}_4$ , filtered, and the solvents were removed under reduced pressure. The corresponding sulfide was obtained in almost pure form without further purification in the yields reported in Scheme 3.

**General procedure for the Mo-catalyzed oxidation of glycerol with bis(*p*-tolyl)sulfoxide:** A mixture of bis(*p*-tolyl)sulfoxide (230 mg, 1 mmol), the appropriate amount of glycerol (1–8 equiv.),  $\text{MoO}_2\text{Cl}_2(\text{dmf})_2$  (9 mg, 2.5 mol%) in mesitylene (2 mL) was heated at 200 °C for 9 h. The reaction mixture was cooled to room temperature and  $\text{Et}_2\text{O}$  (20 mL) and water (20 mL) were added. The layers were separated and the aqueous layer extracted with  $\text{Et}_2\text{O}$  (2 × 20 mL). The combined organic layers were dried over anhydrous  $\text{Na}_2\text{SO}_4$ , filtered, and the solvents were removed under reduced pressure. Bis(*p*-tolyl)sulfide was formed in the conversions estimated by  $^1\text{H}$  NMR (300 MHz) reported in Scheme 4.

**General procedure for the reduction of sulfoxides using oxidation products from glycerol as reducing agents:** A mixture of bis(*p*-tolyl)sulfoxide (230 mg, 1 mmol), the appropriate amount of reducing agent (1–6 equiv.), and  $\text{MoO}_2\text{Cl}_2(\text{dmf})_2$  (9 mg, 2.5 mol%) in toluene (1 mL) was irradiated in a sealed tube in the microwave cavity at 180 or 230 °C for 5 min. The reaction mixture was cooled to room temperature and  $\text{Et}_2\text{O}$  (20 mL) and  $\text{H}_2\text{O}$  (20 mL) were added. The

layers were separated and the aqueous layer extracted with Et<sub>2</sub>O (2 × 20 mL). The combined organic layers were dried over anhydrous Na<sub>2</sub>SO<sub>4</sub>, filtered, and the solvents were removed under reduced pressure to give bis(*p*-tolyl)sulfide in the conversions and yields reported in Table 3.

**NMR studies and spectra for the determination of glycerol oxidation products in the process:**

A mixture glycerol (276 mg, 3 mmol), the appropriate amount of DMSO-d<sub>6</sub> (1 to 6 equiv.), and MoO<sub>2</sub>Cl<sub>2</sub>(dmf)<sub>2</sub> (9–17 mg, 2.5–5.0 mol%) was heated at 170 °C overnight or at 200 °C for 4 h. After cooling, the crude reaction mixture was homogenized, if necessary, by adding additional DMSO-d<sub>6</sub> and its <sup>13</sup>C NMR was measured. In the spectra reported below of all the experiments performed we could observe the signals corresponding to the formation of formic acid (δ = 167.7) as main product as well as variable amounts of remaining glycerol (δ = 73.8 and 64.4).

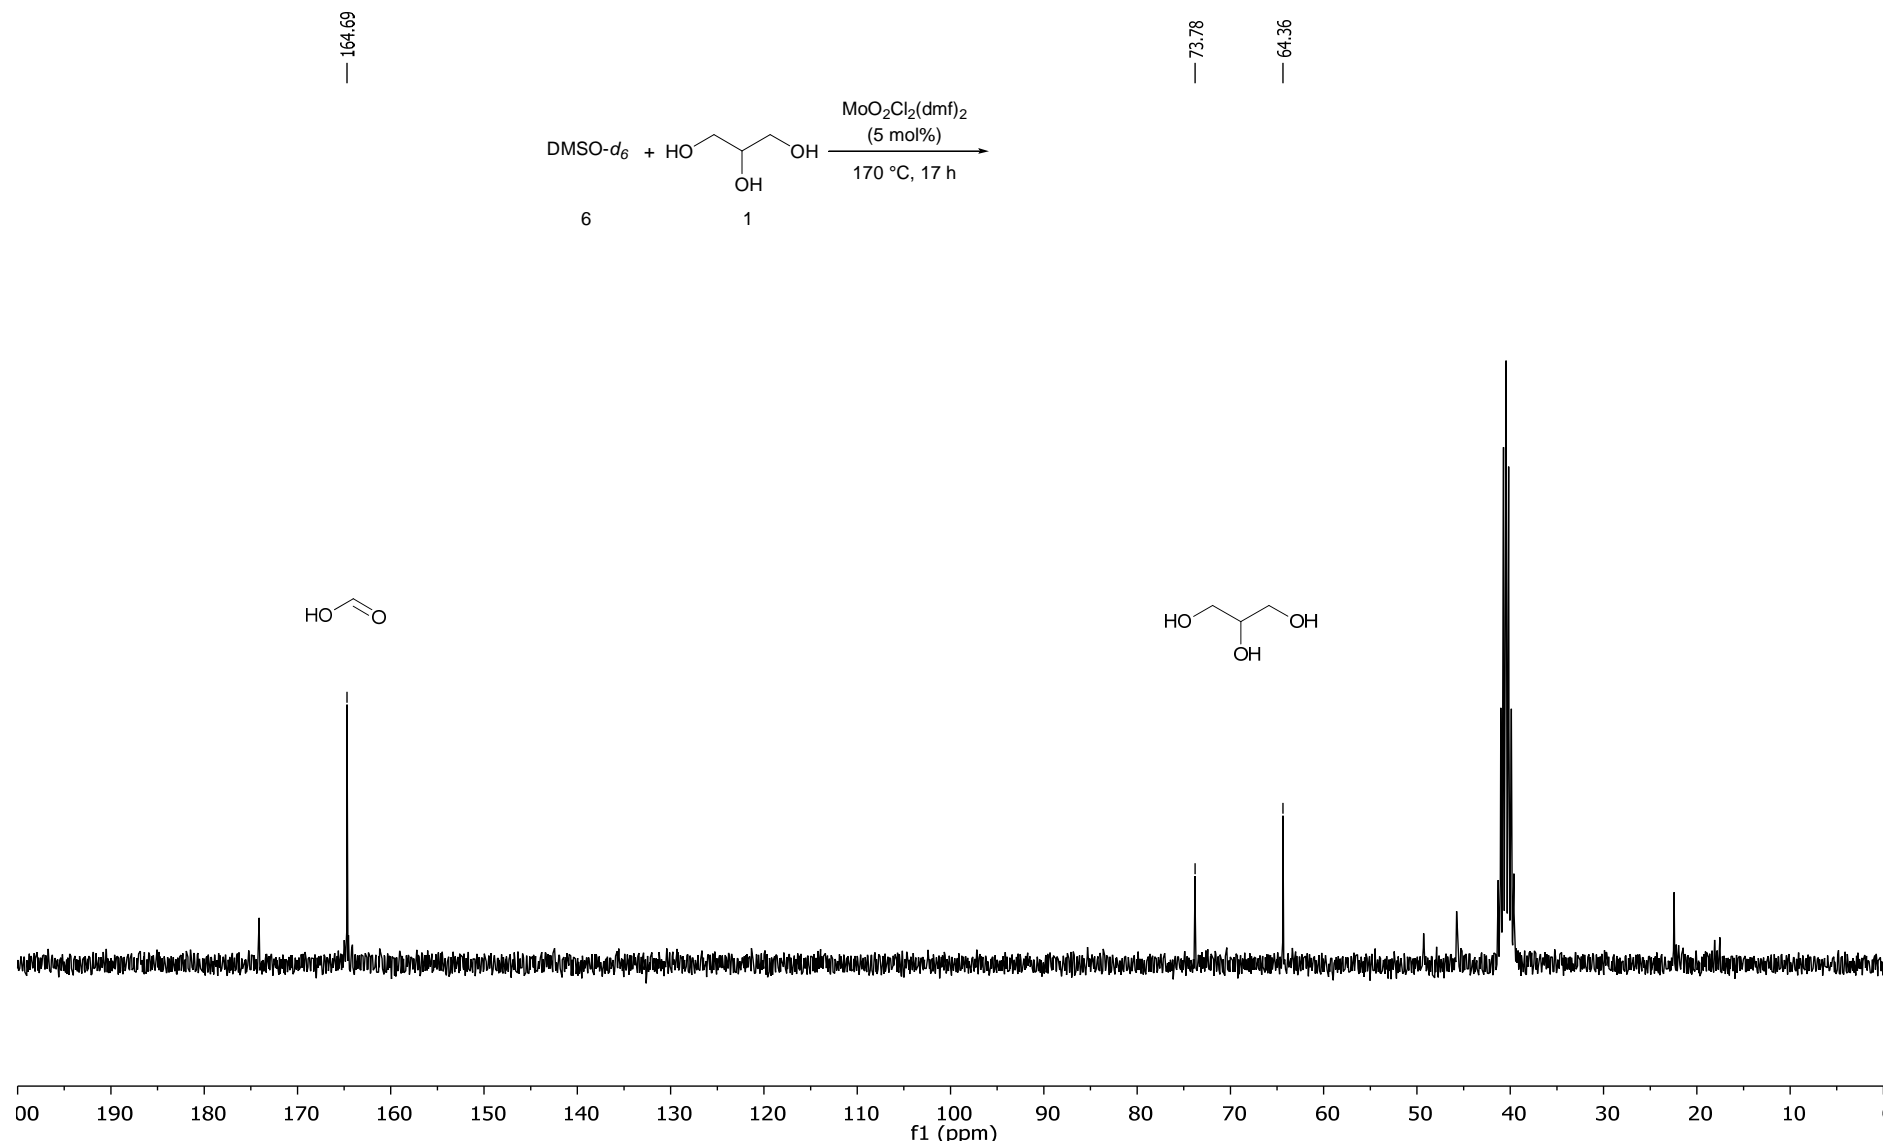

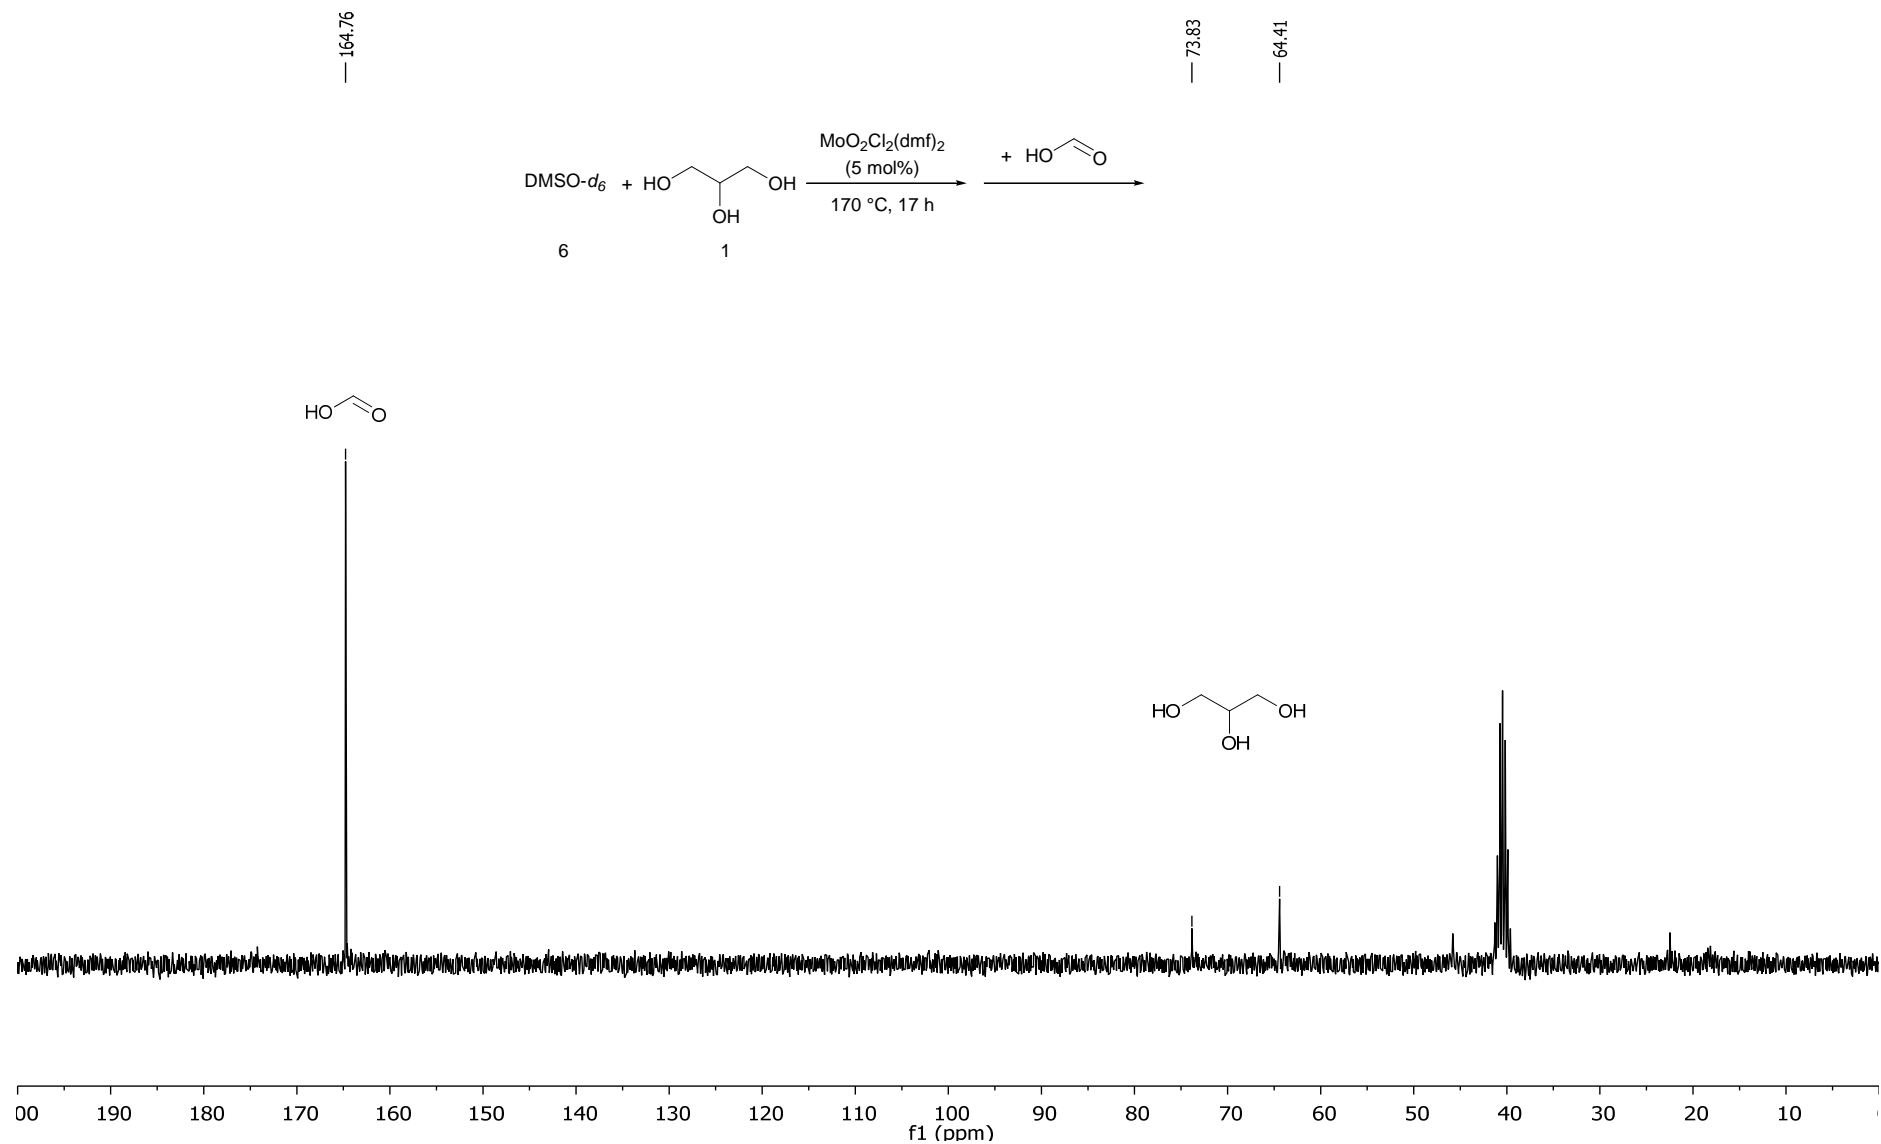

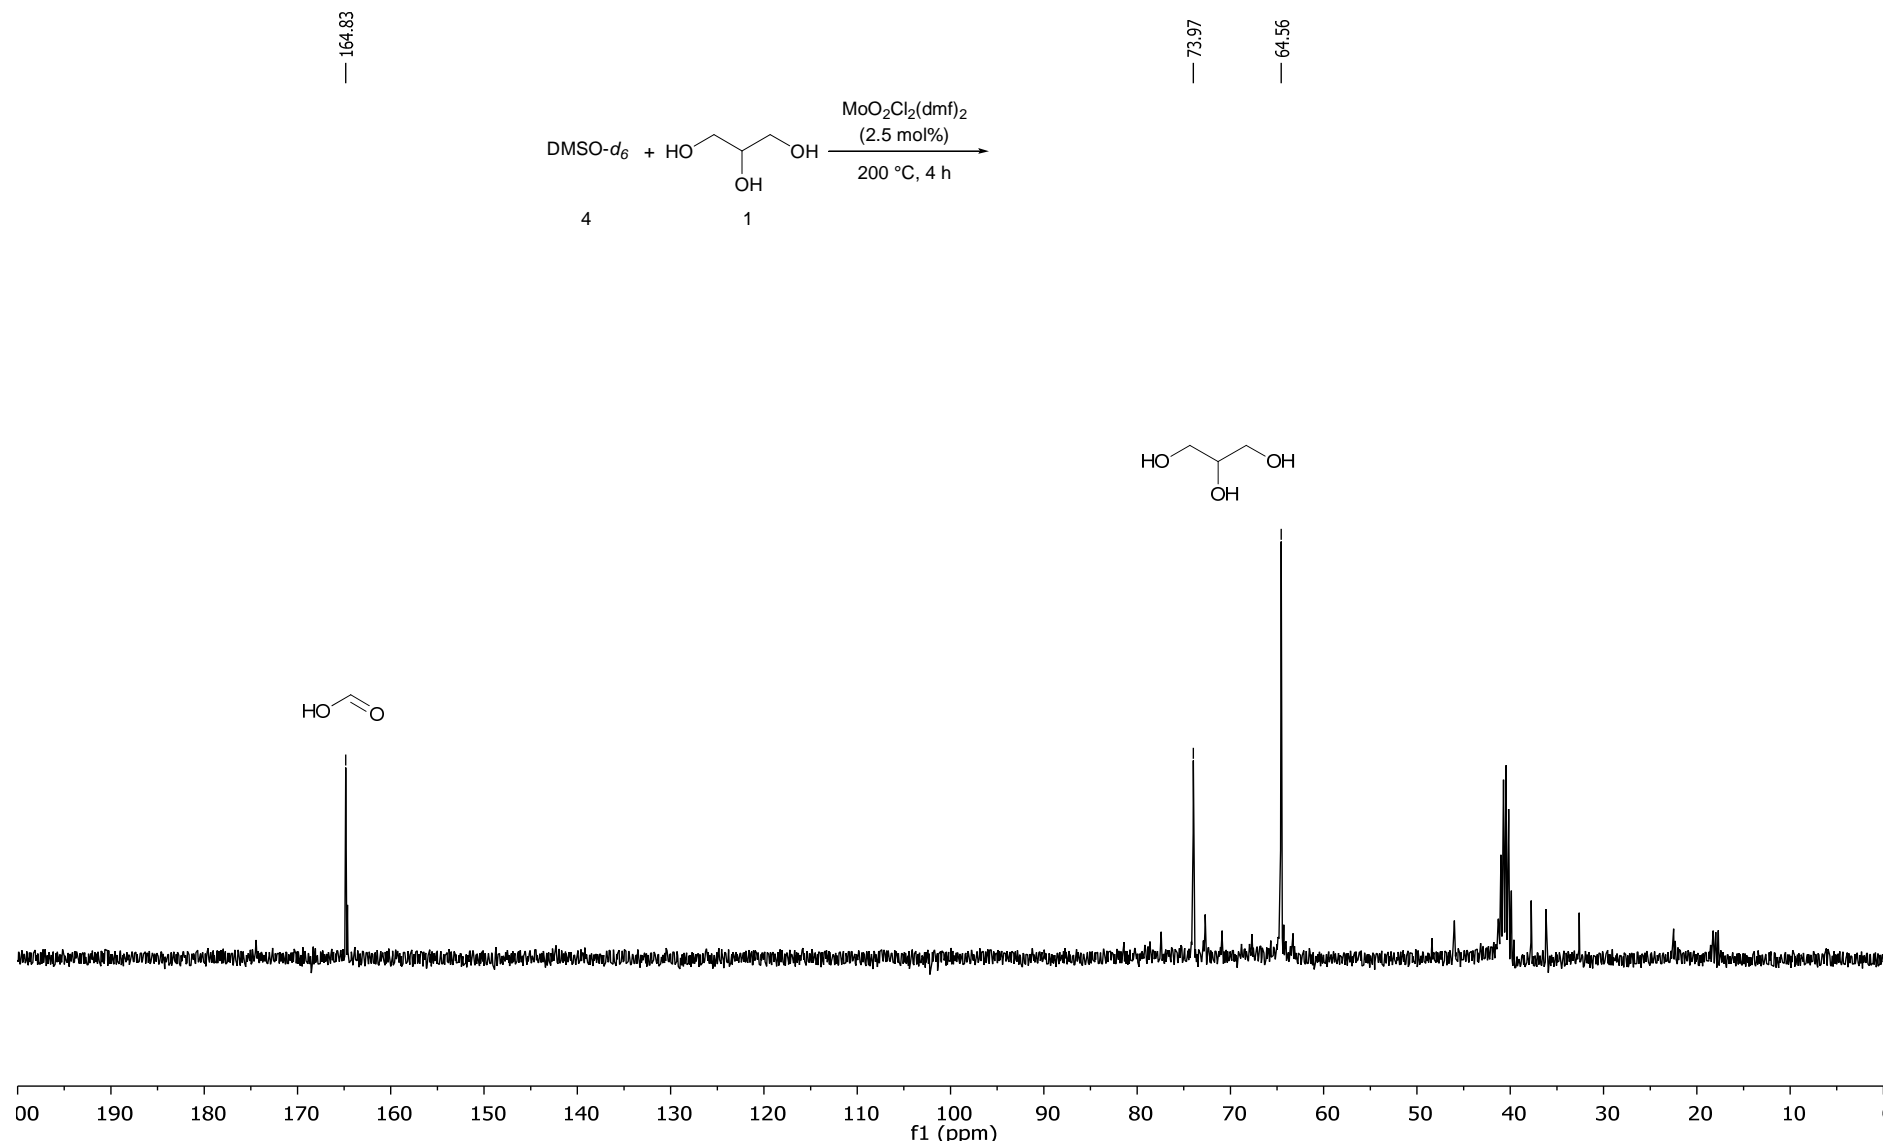



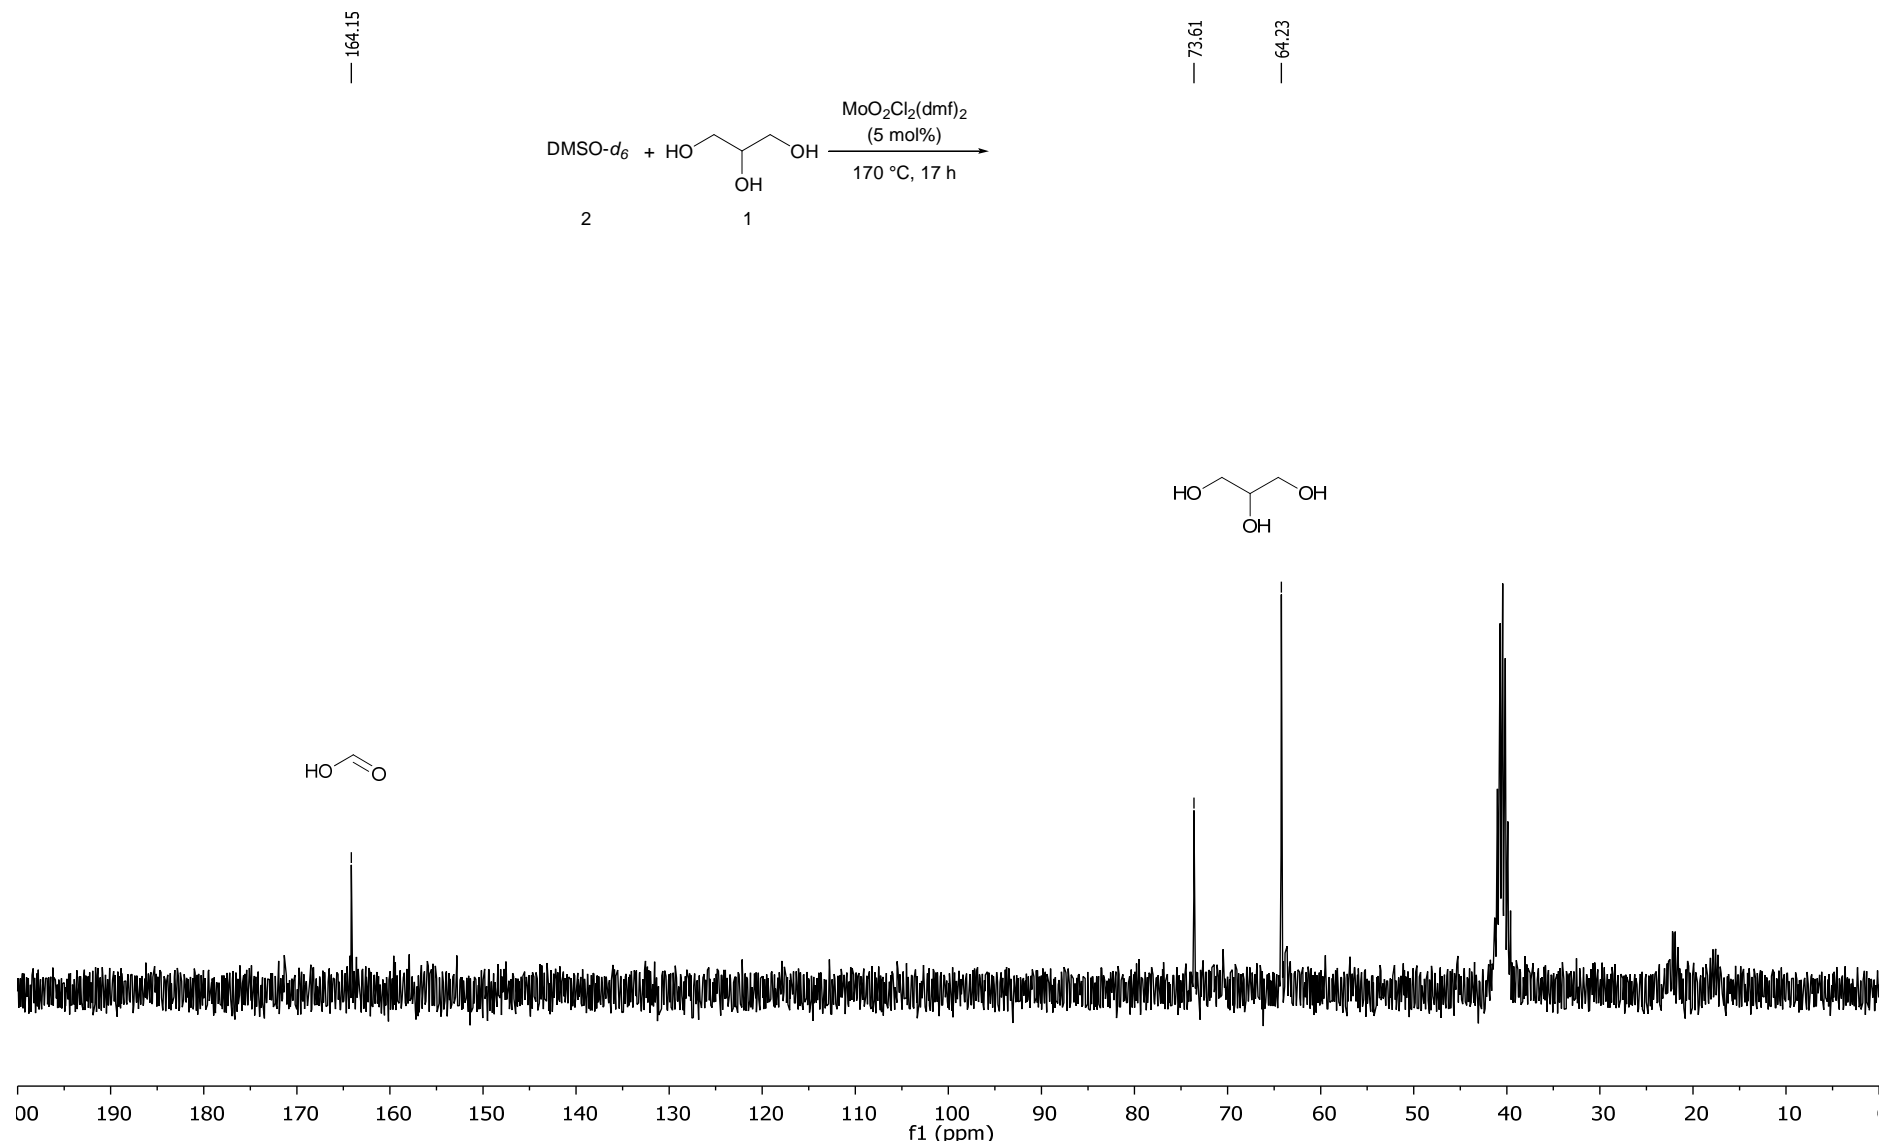

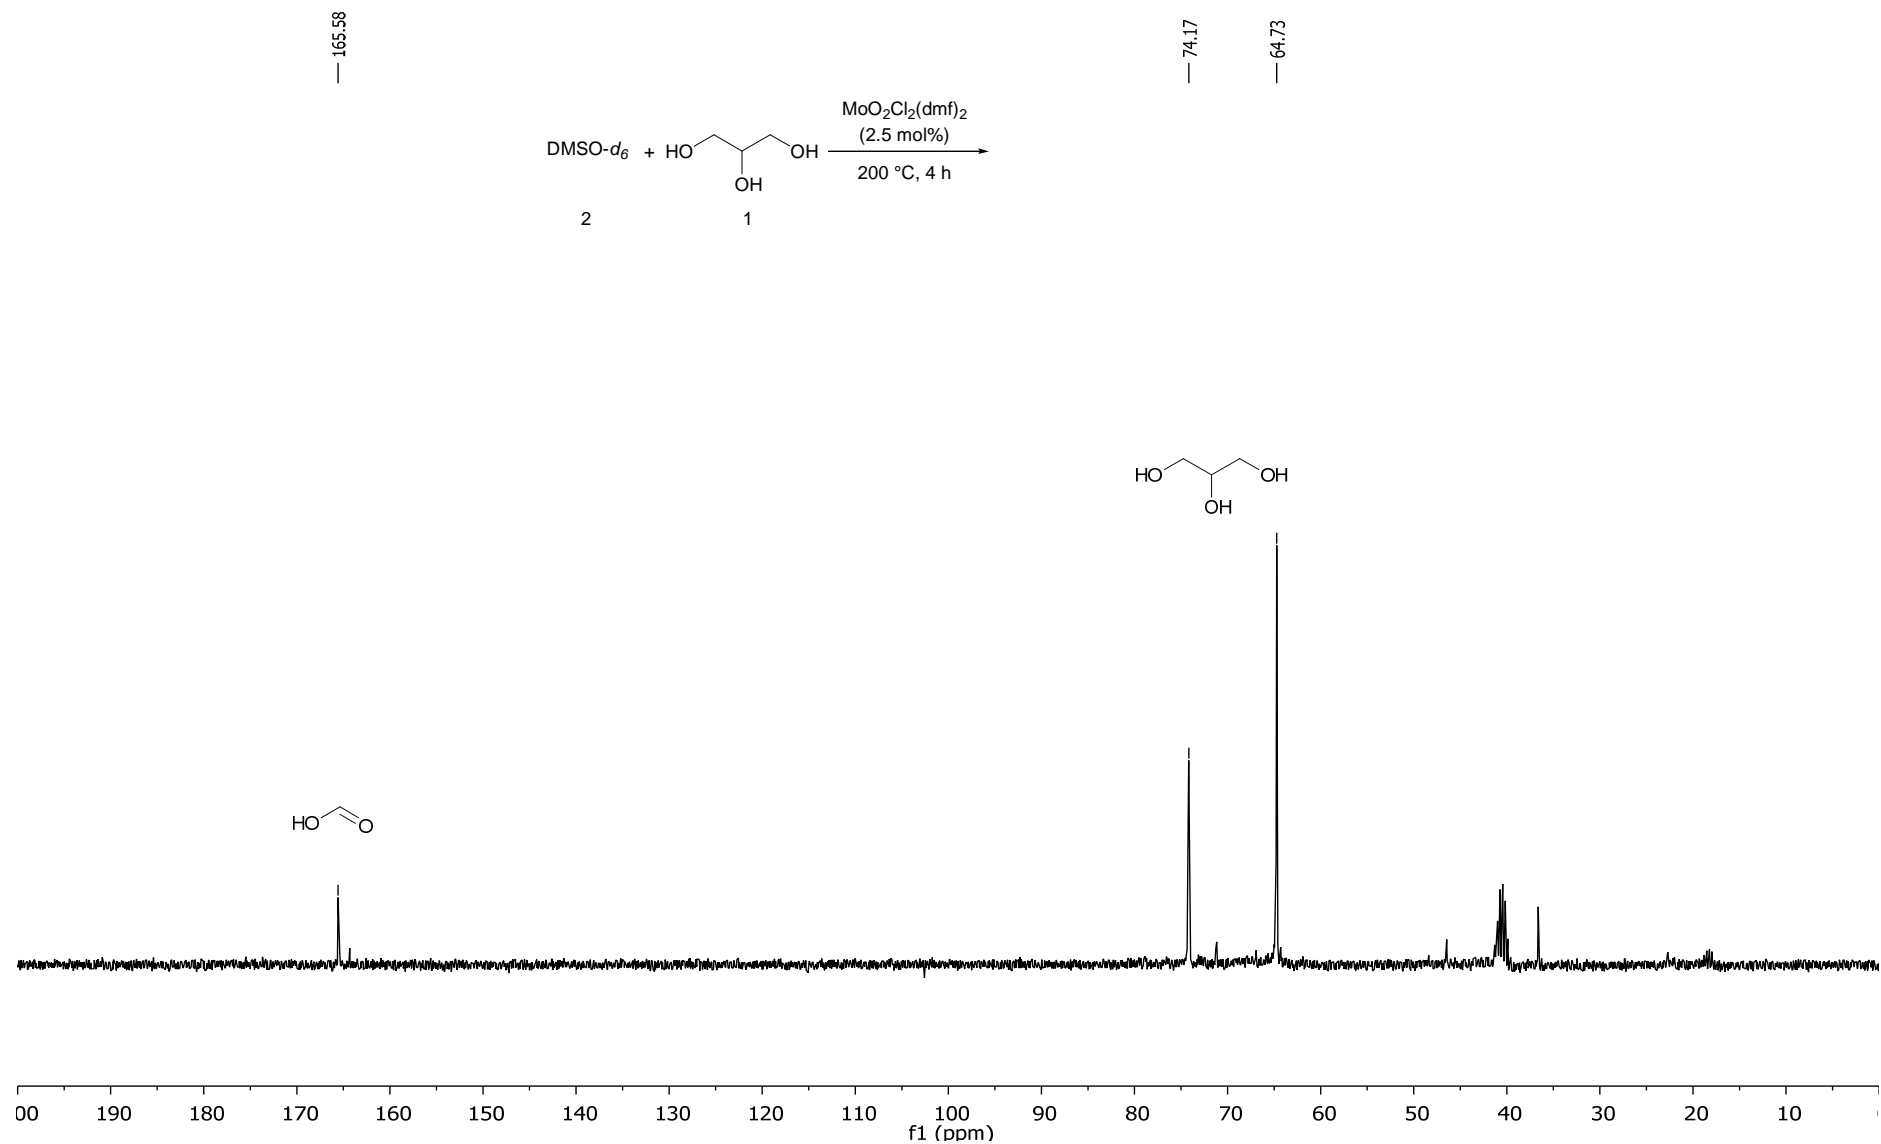

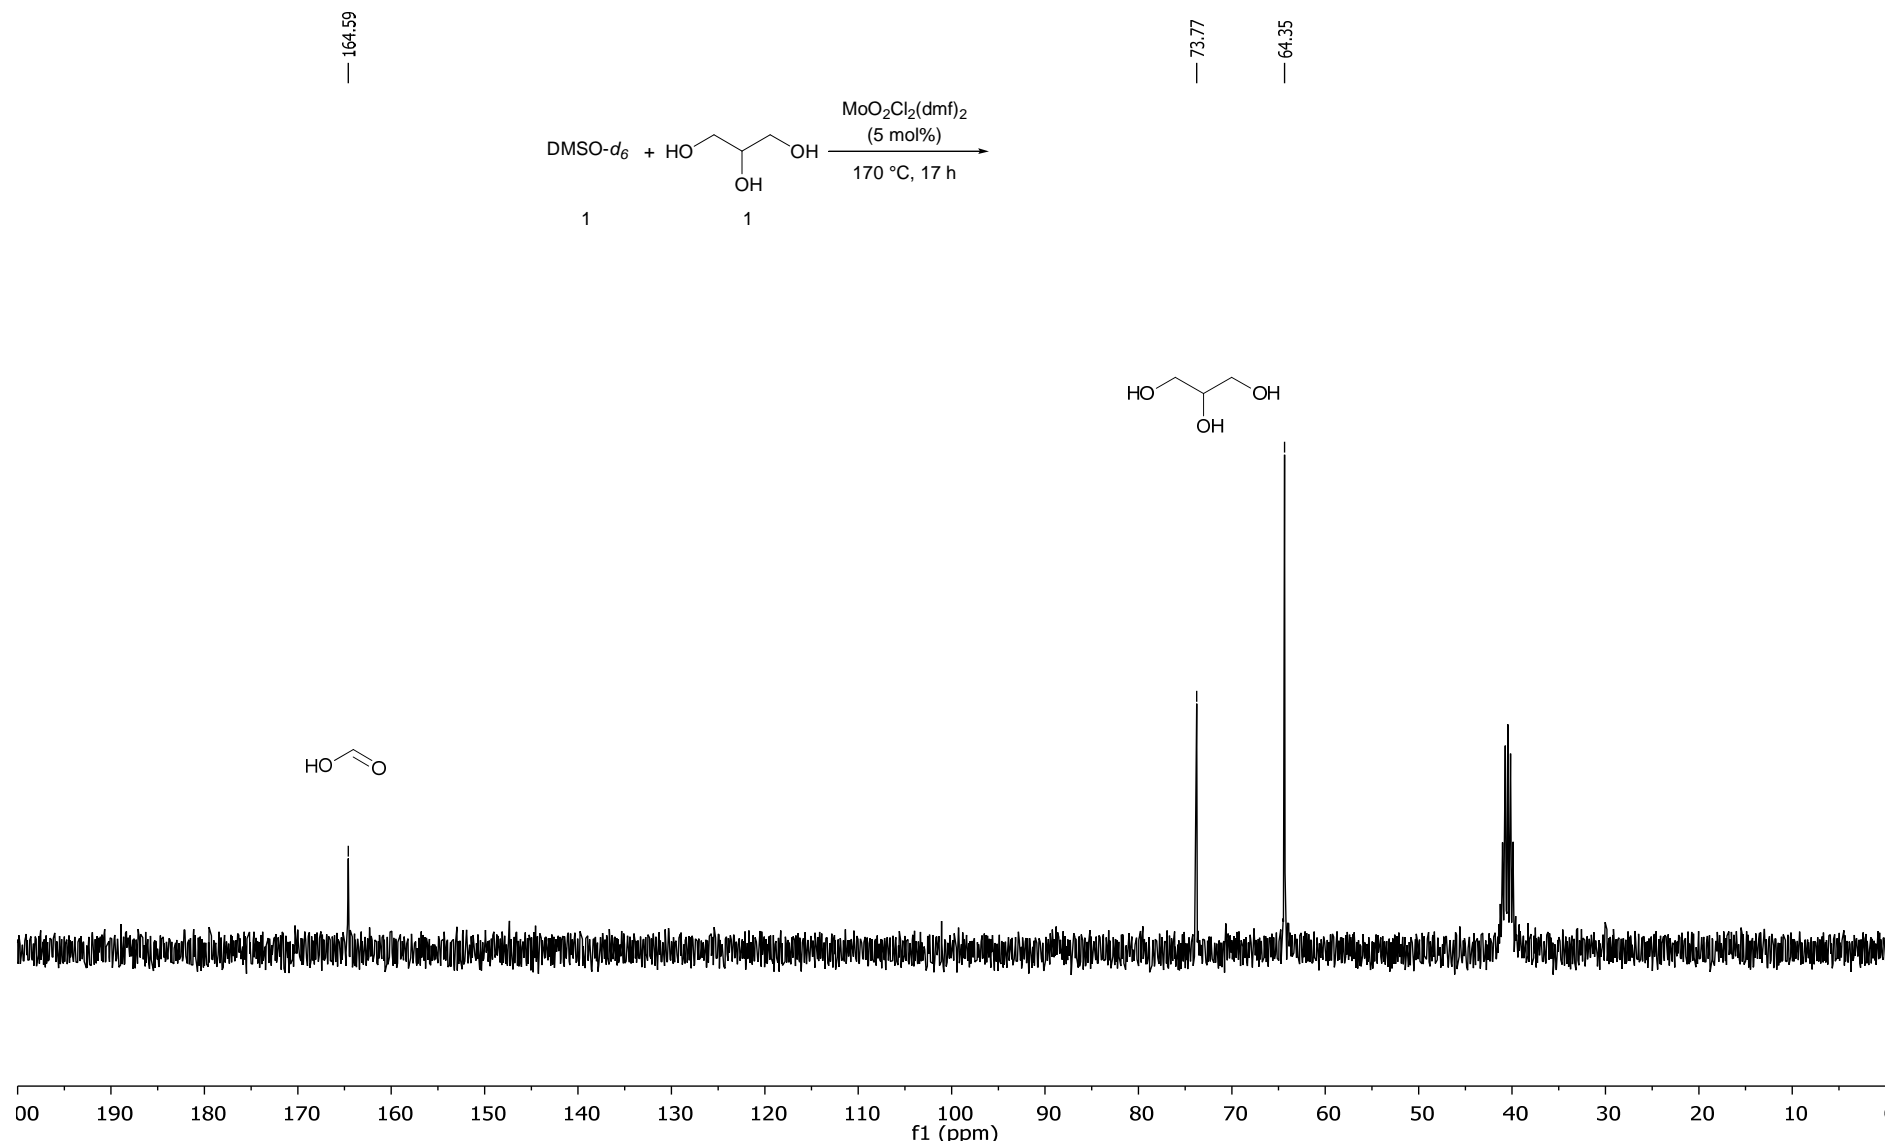

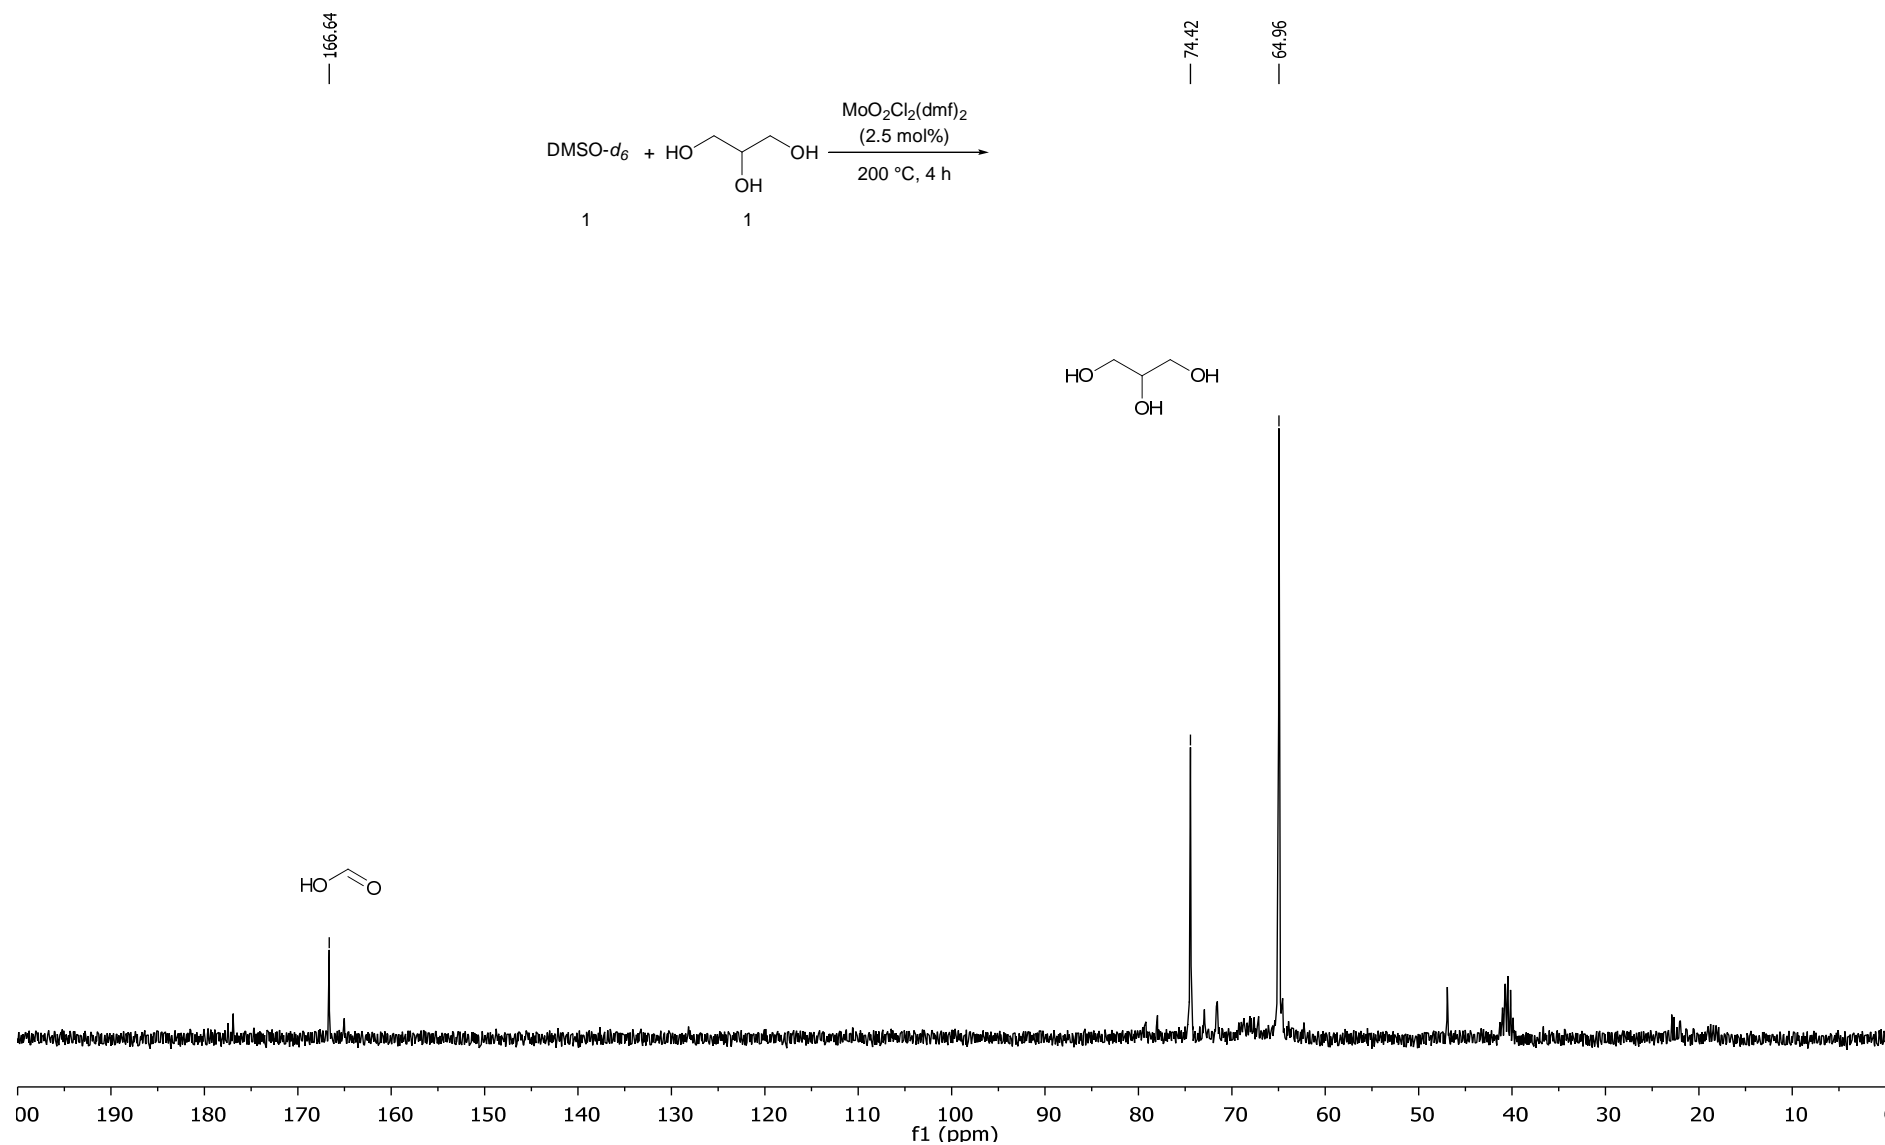

**NMR spectra of products obtained after extraction in Table 2 and Schemes 1, 2 and 3**

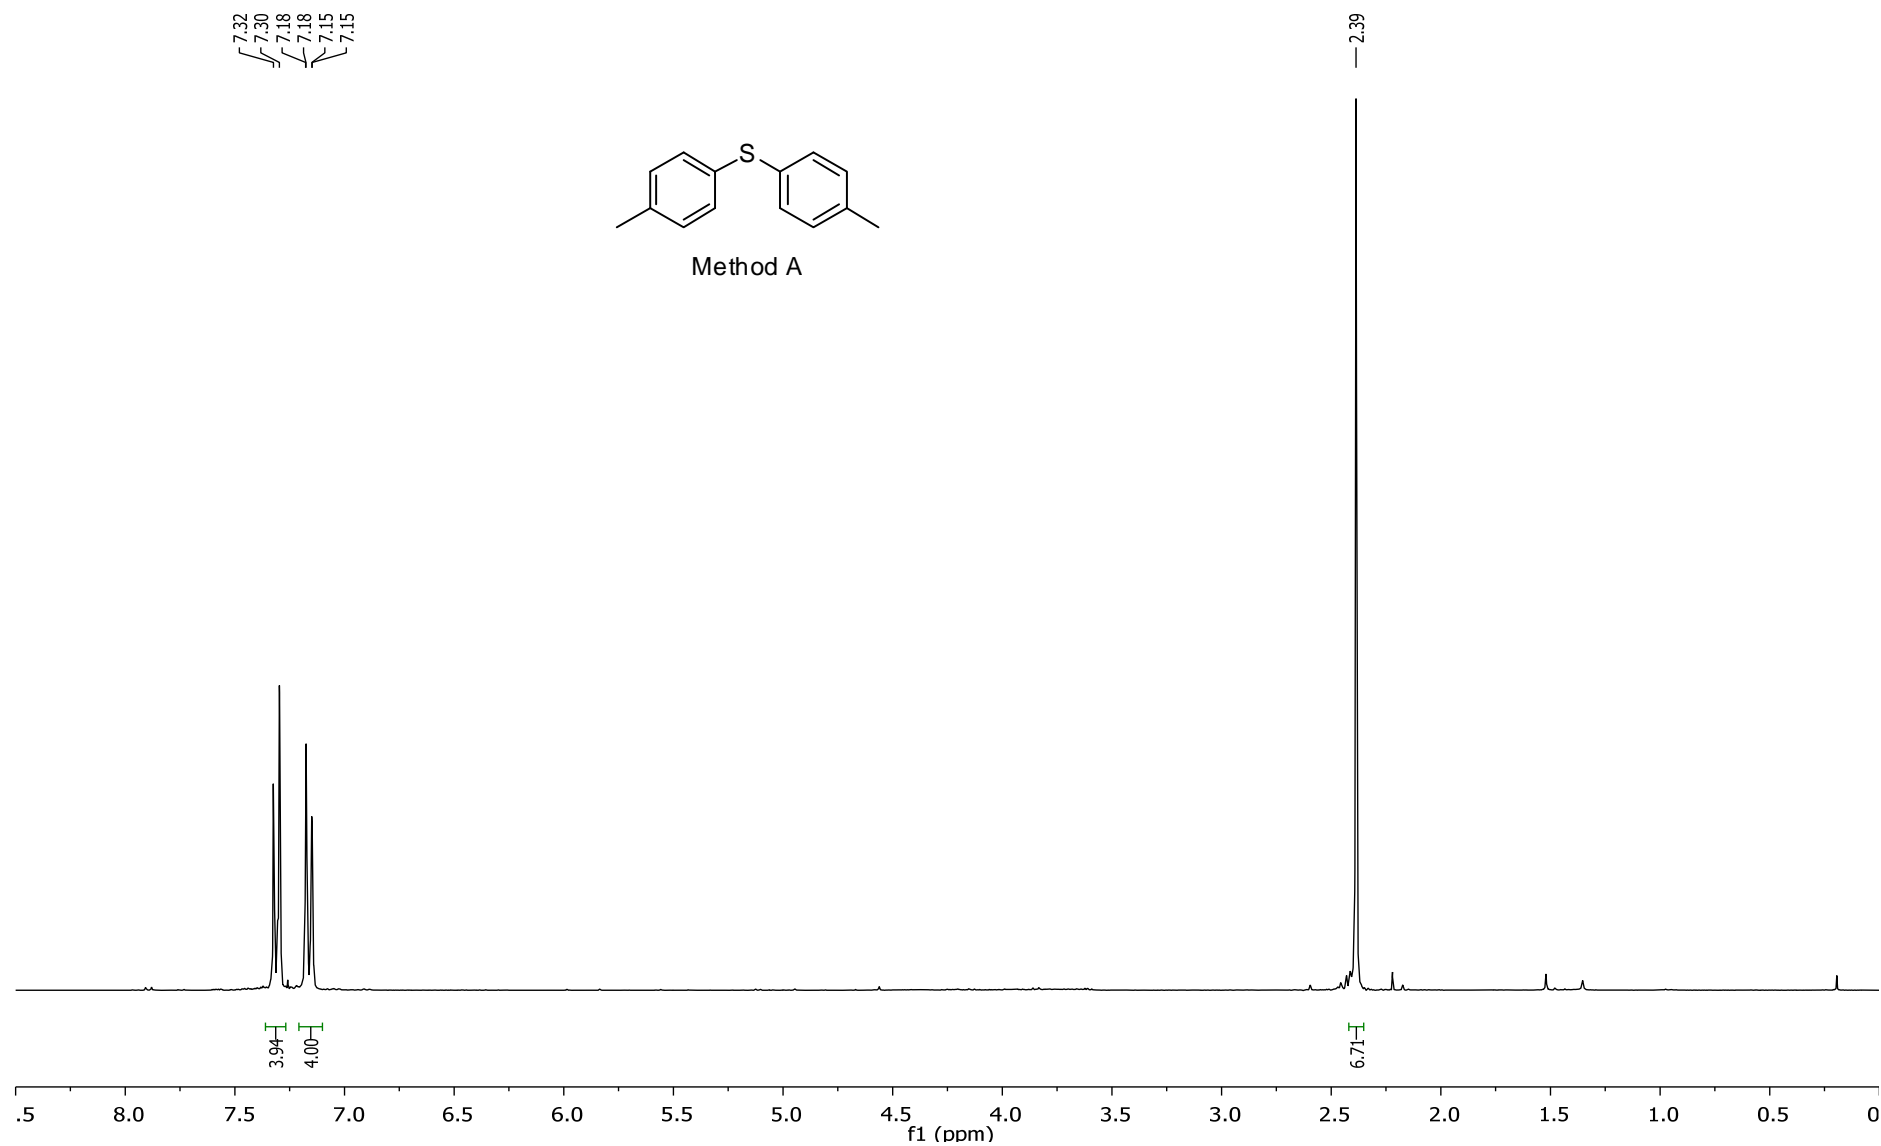

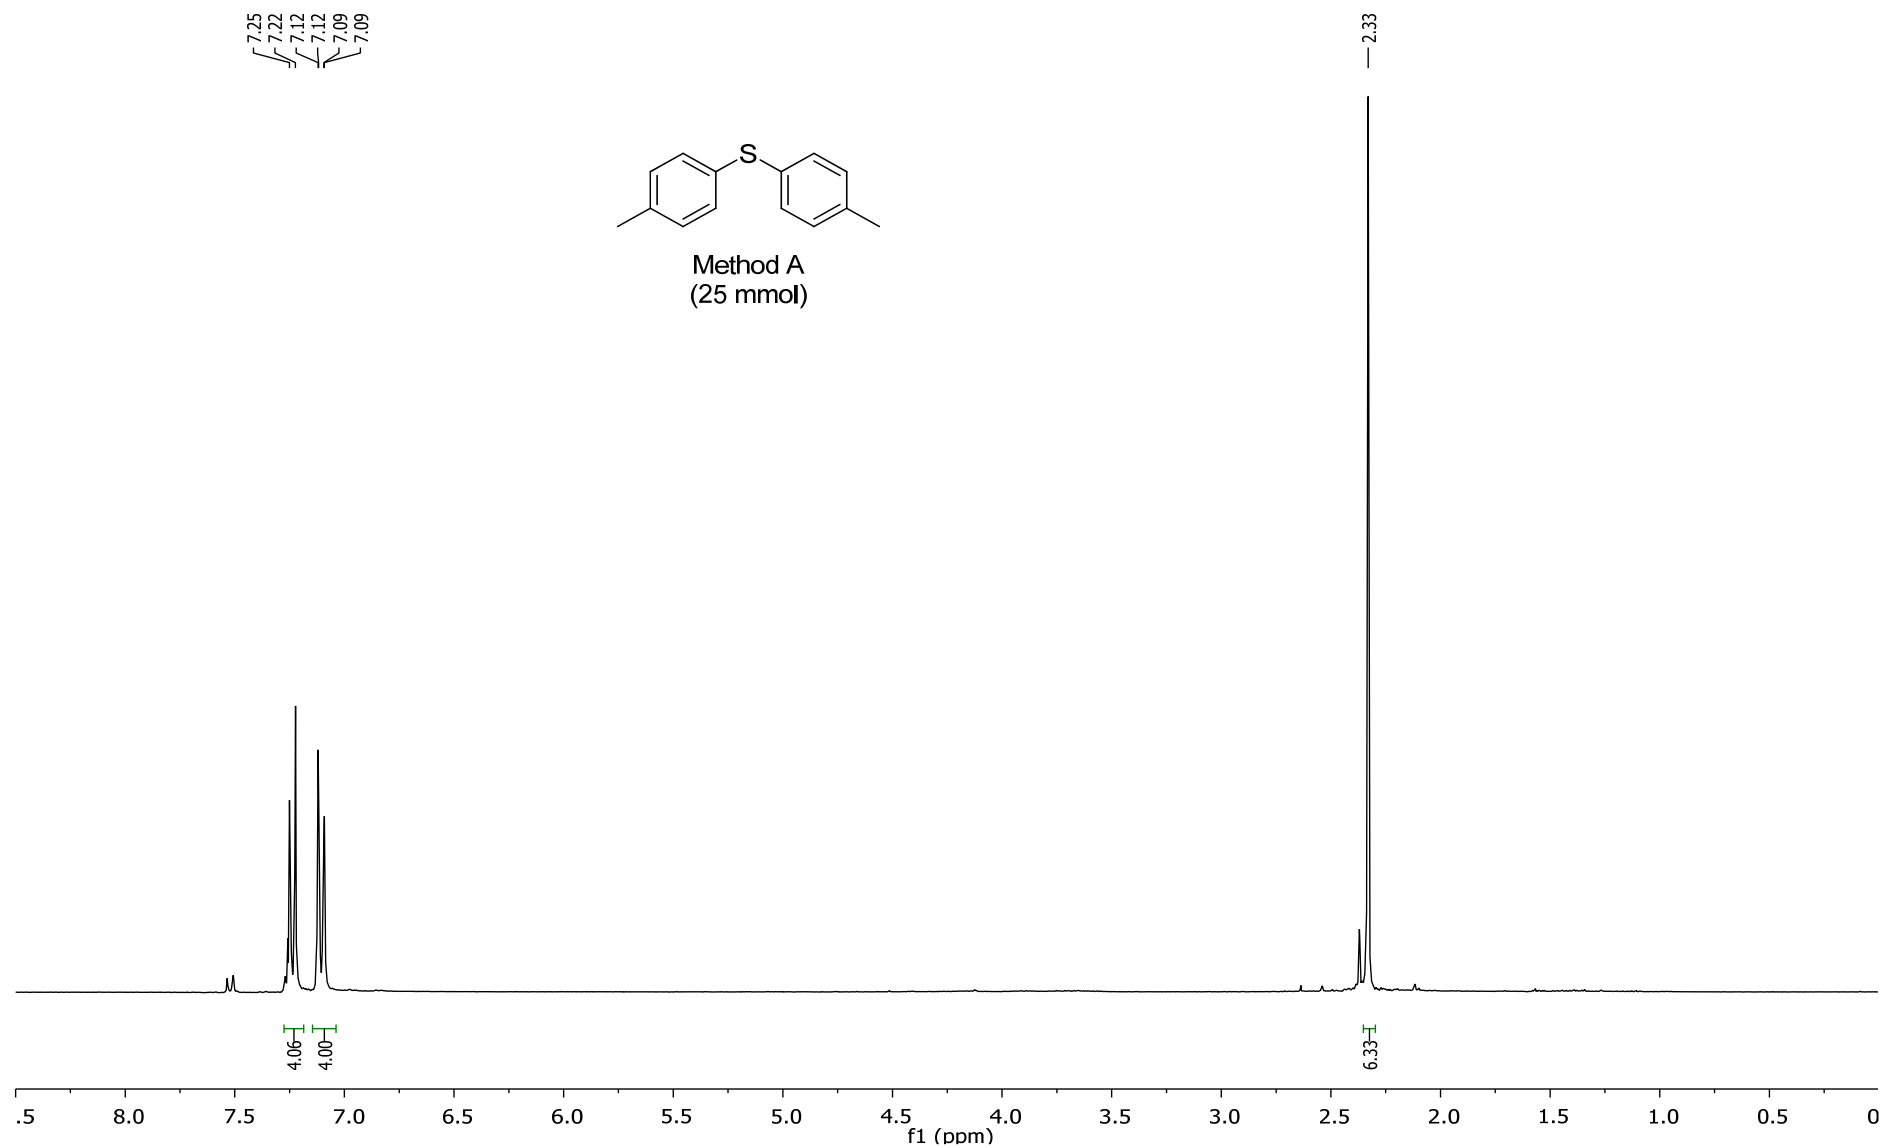

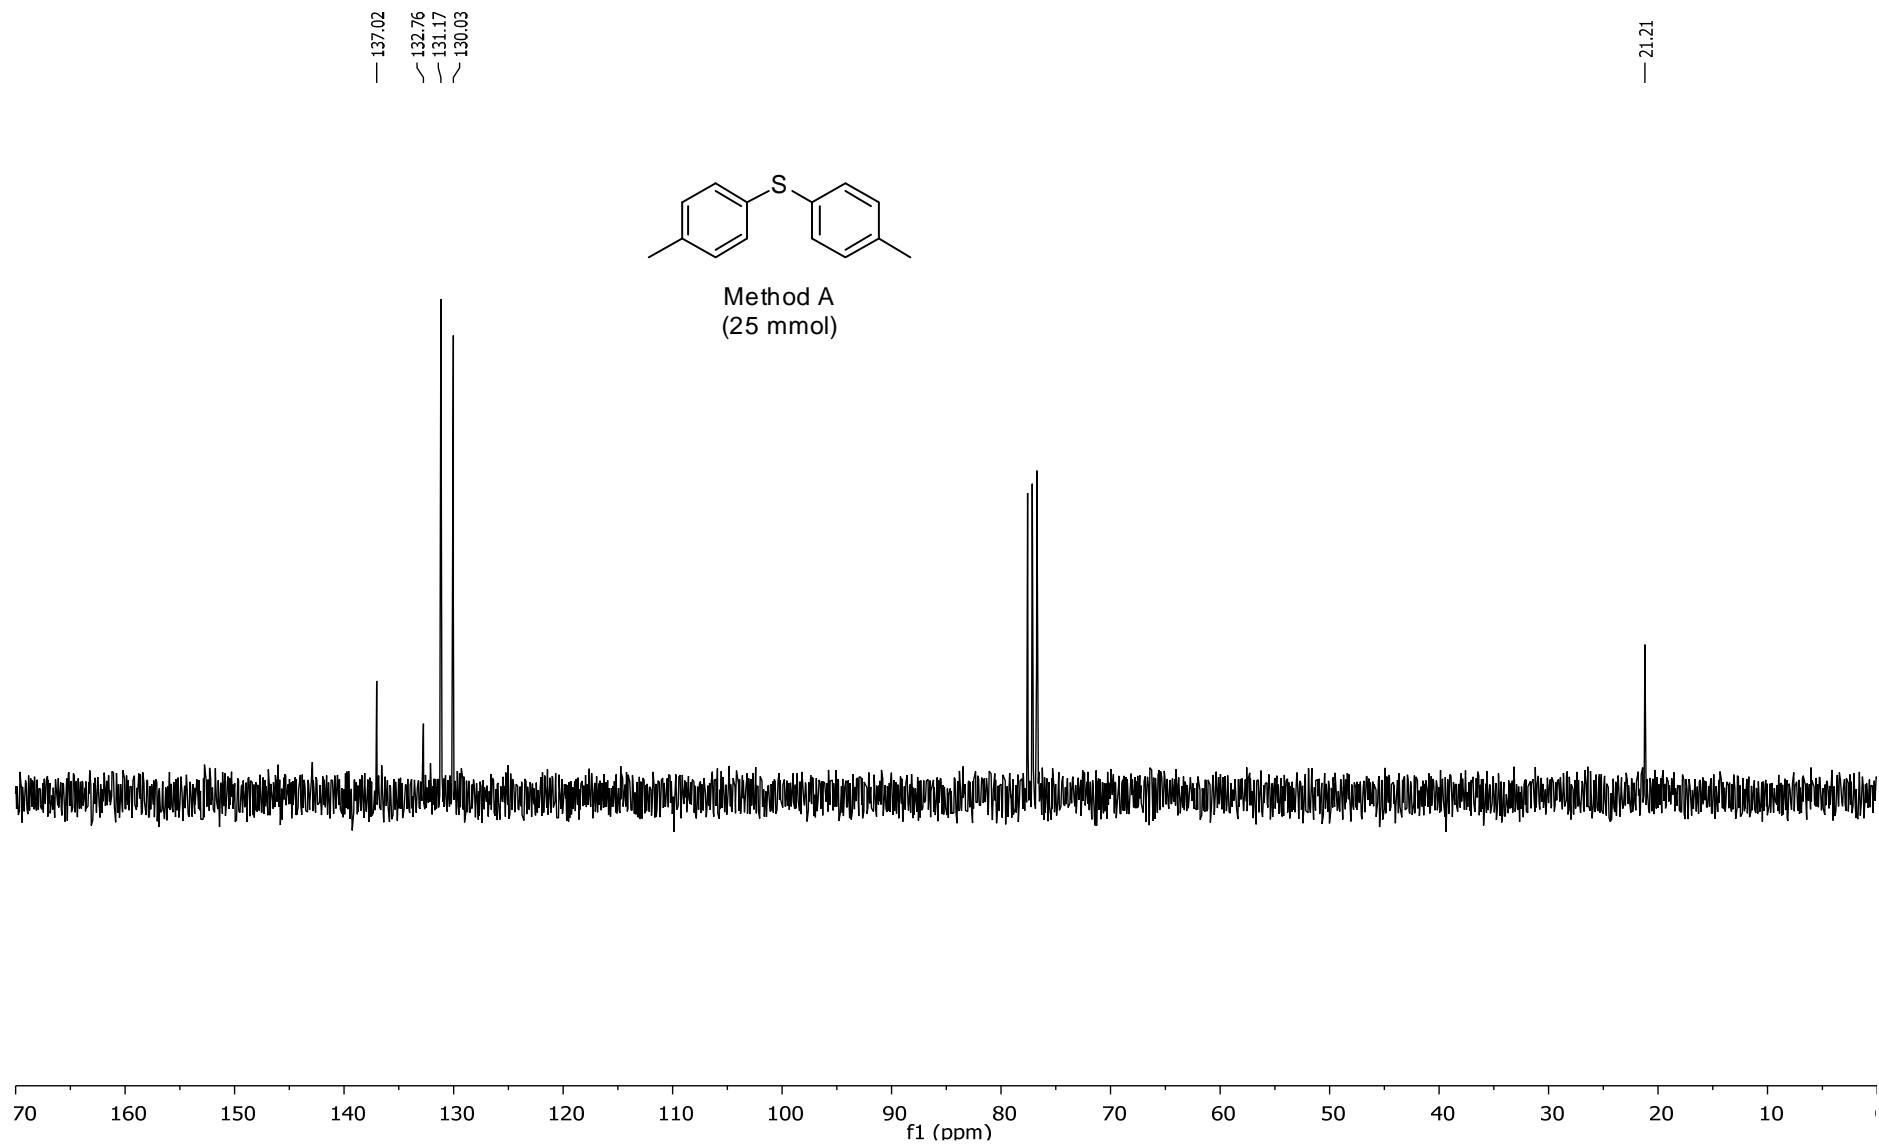



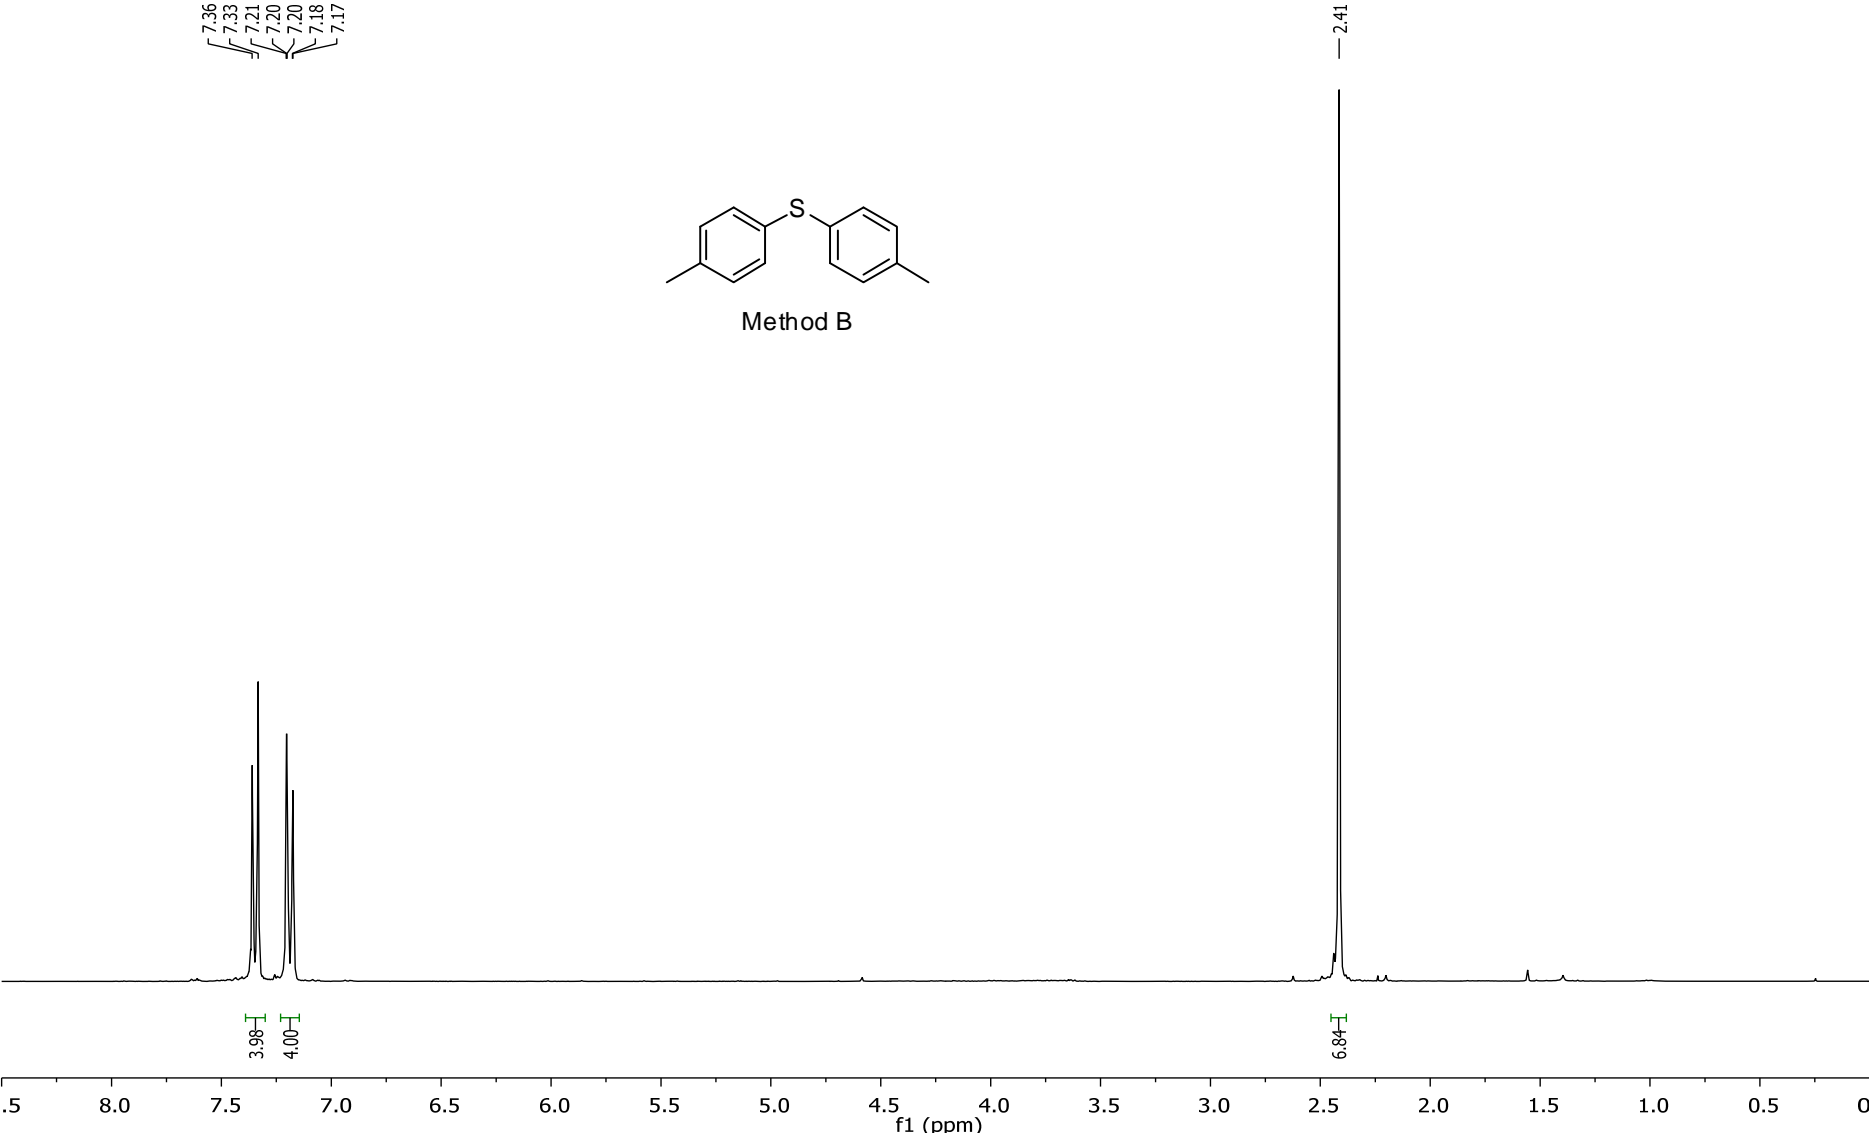

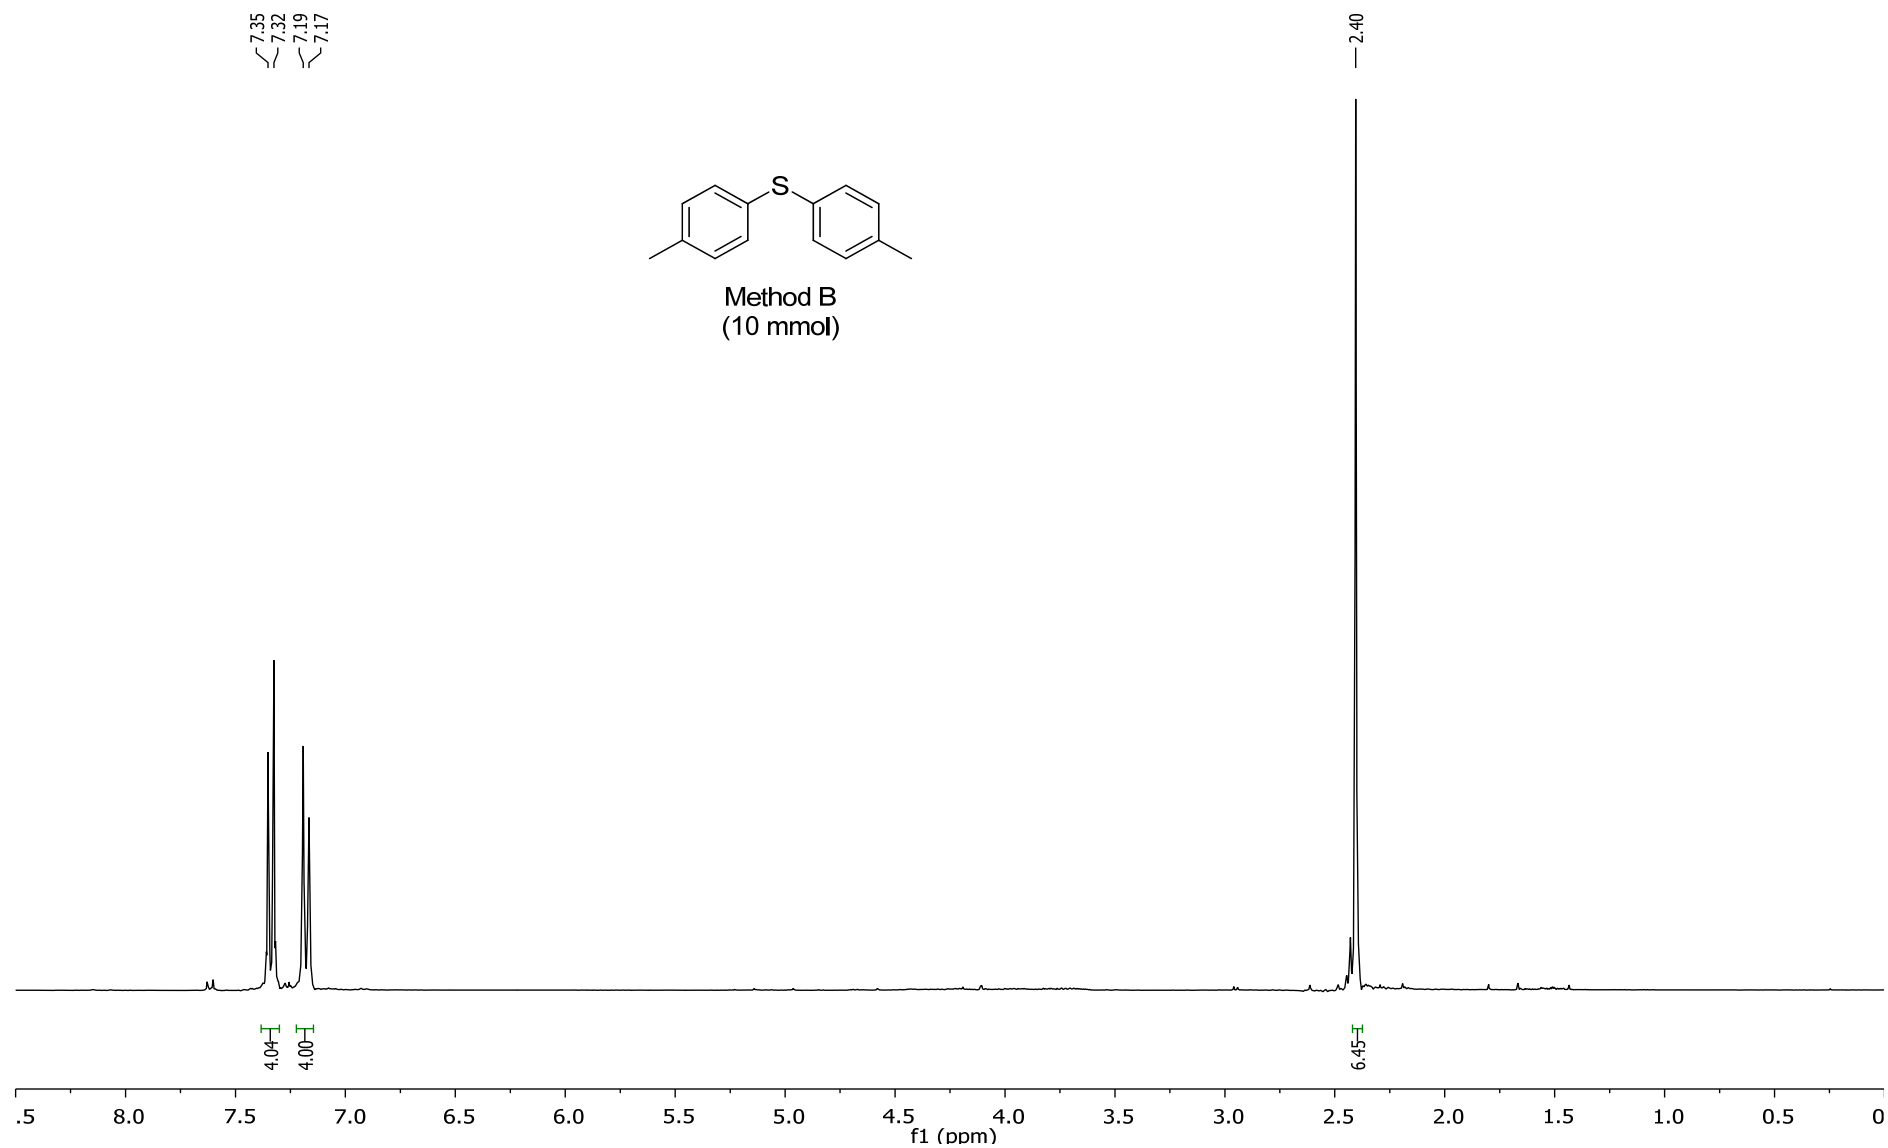

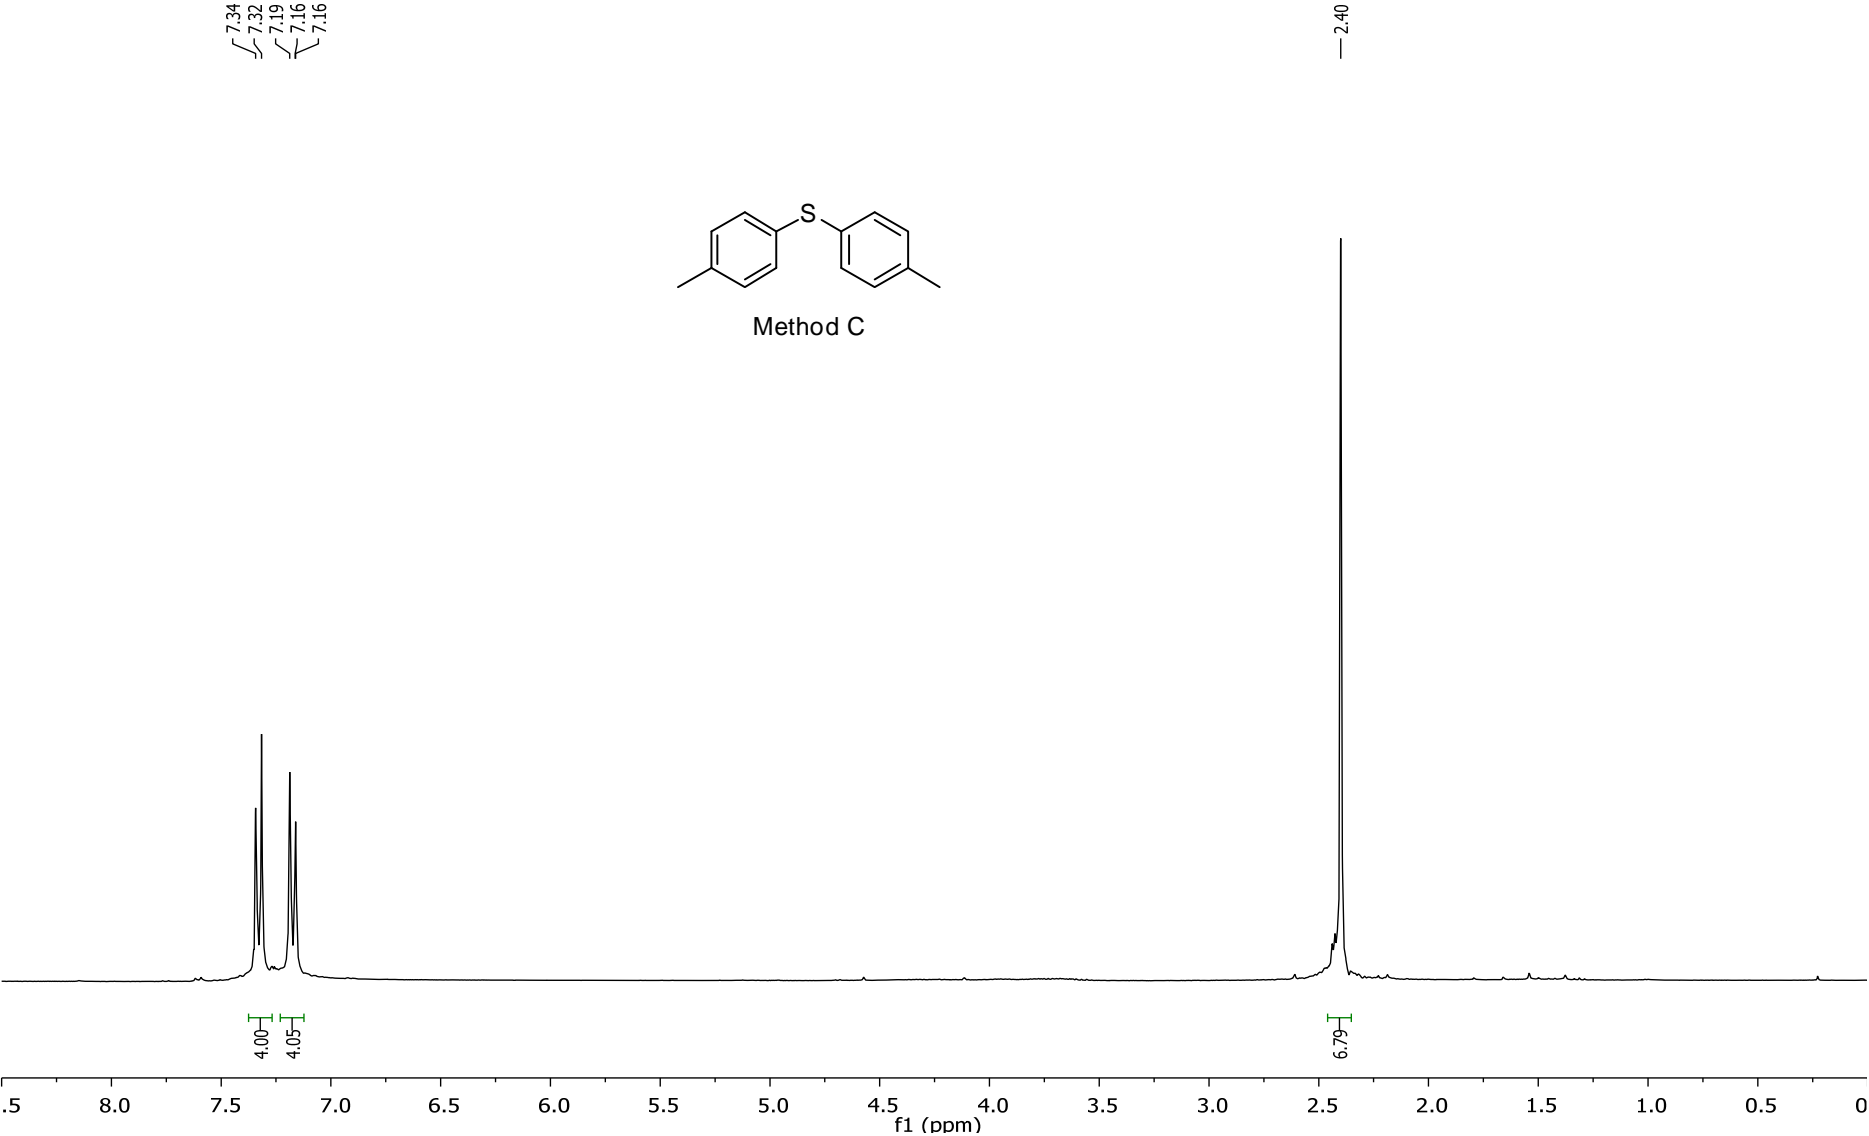

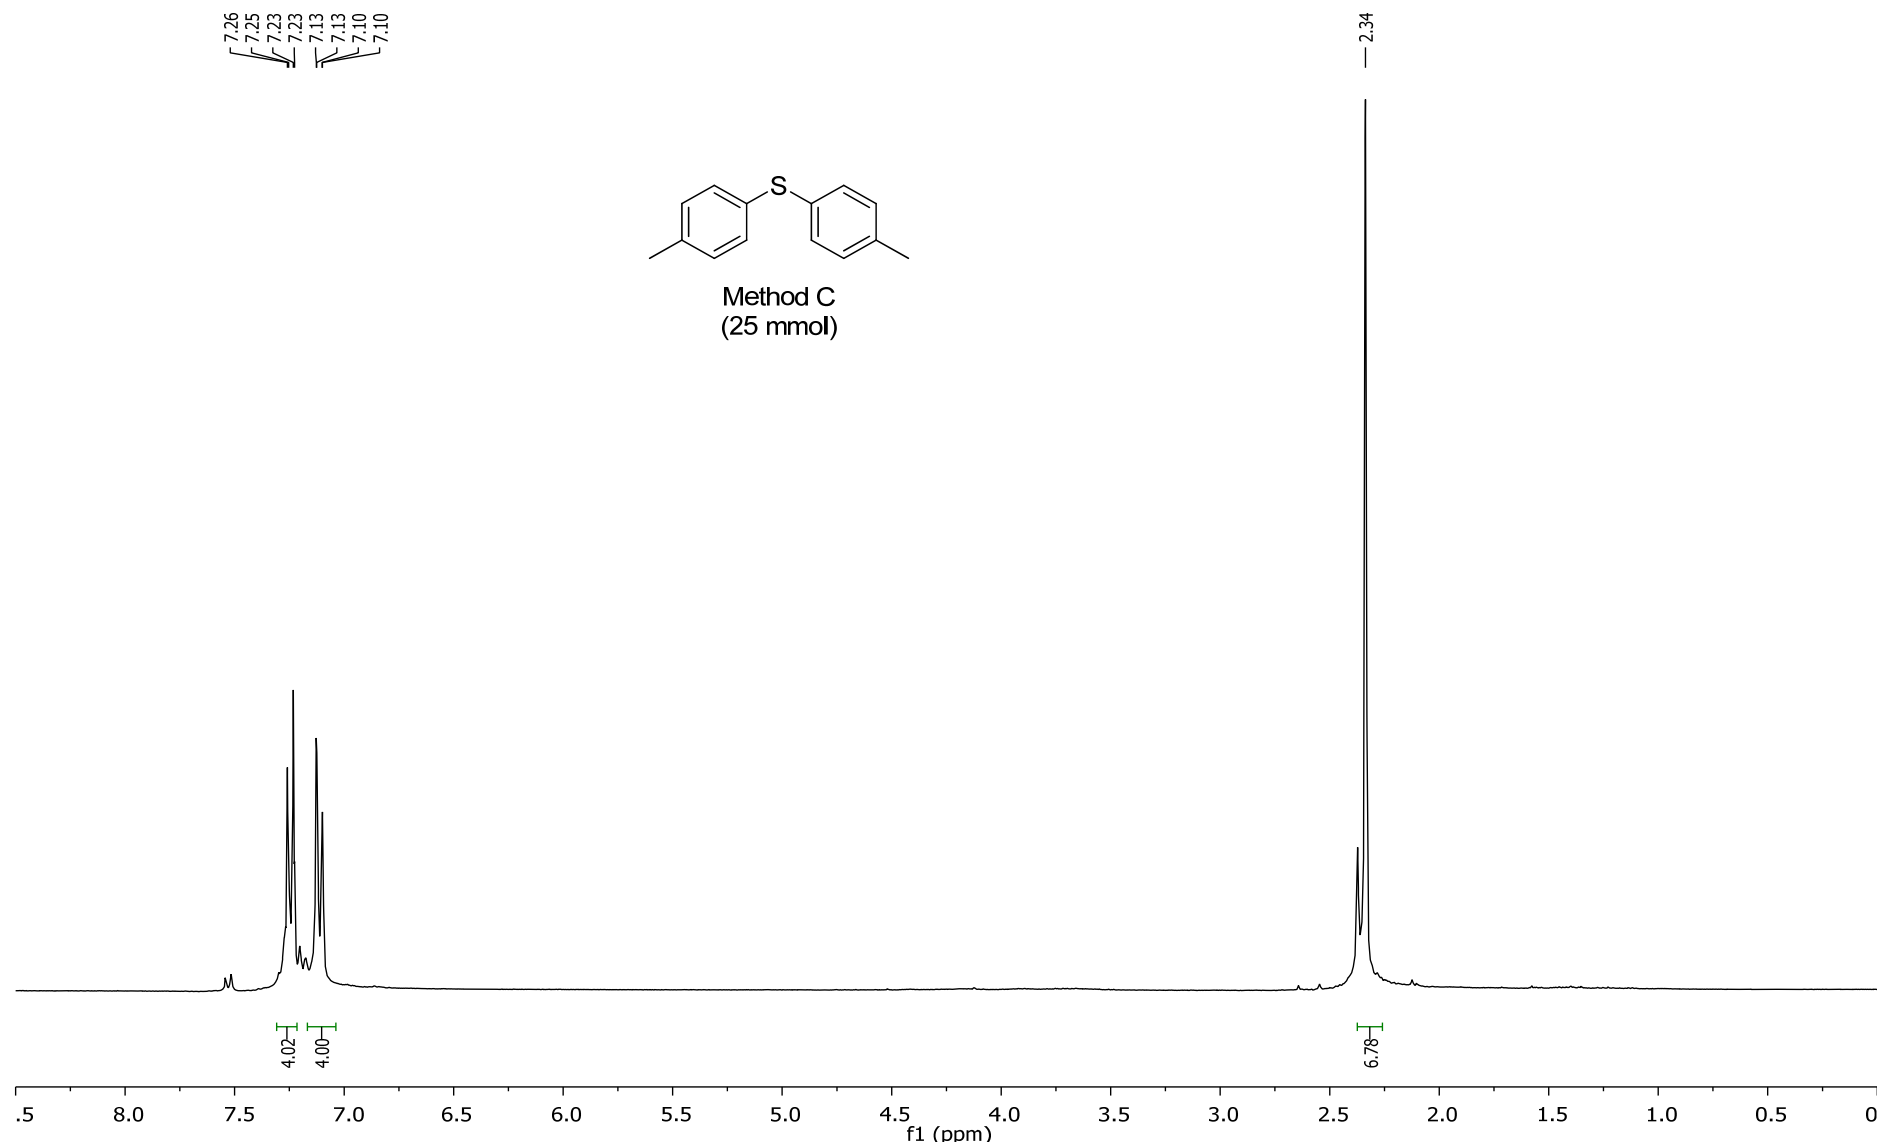

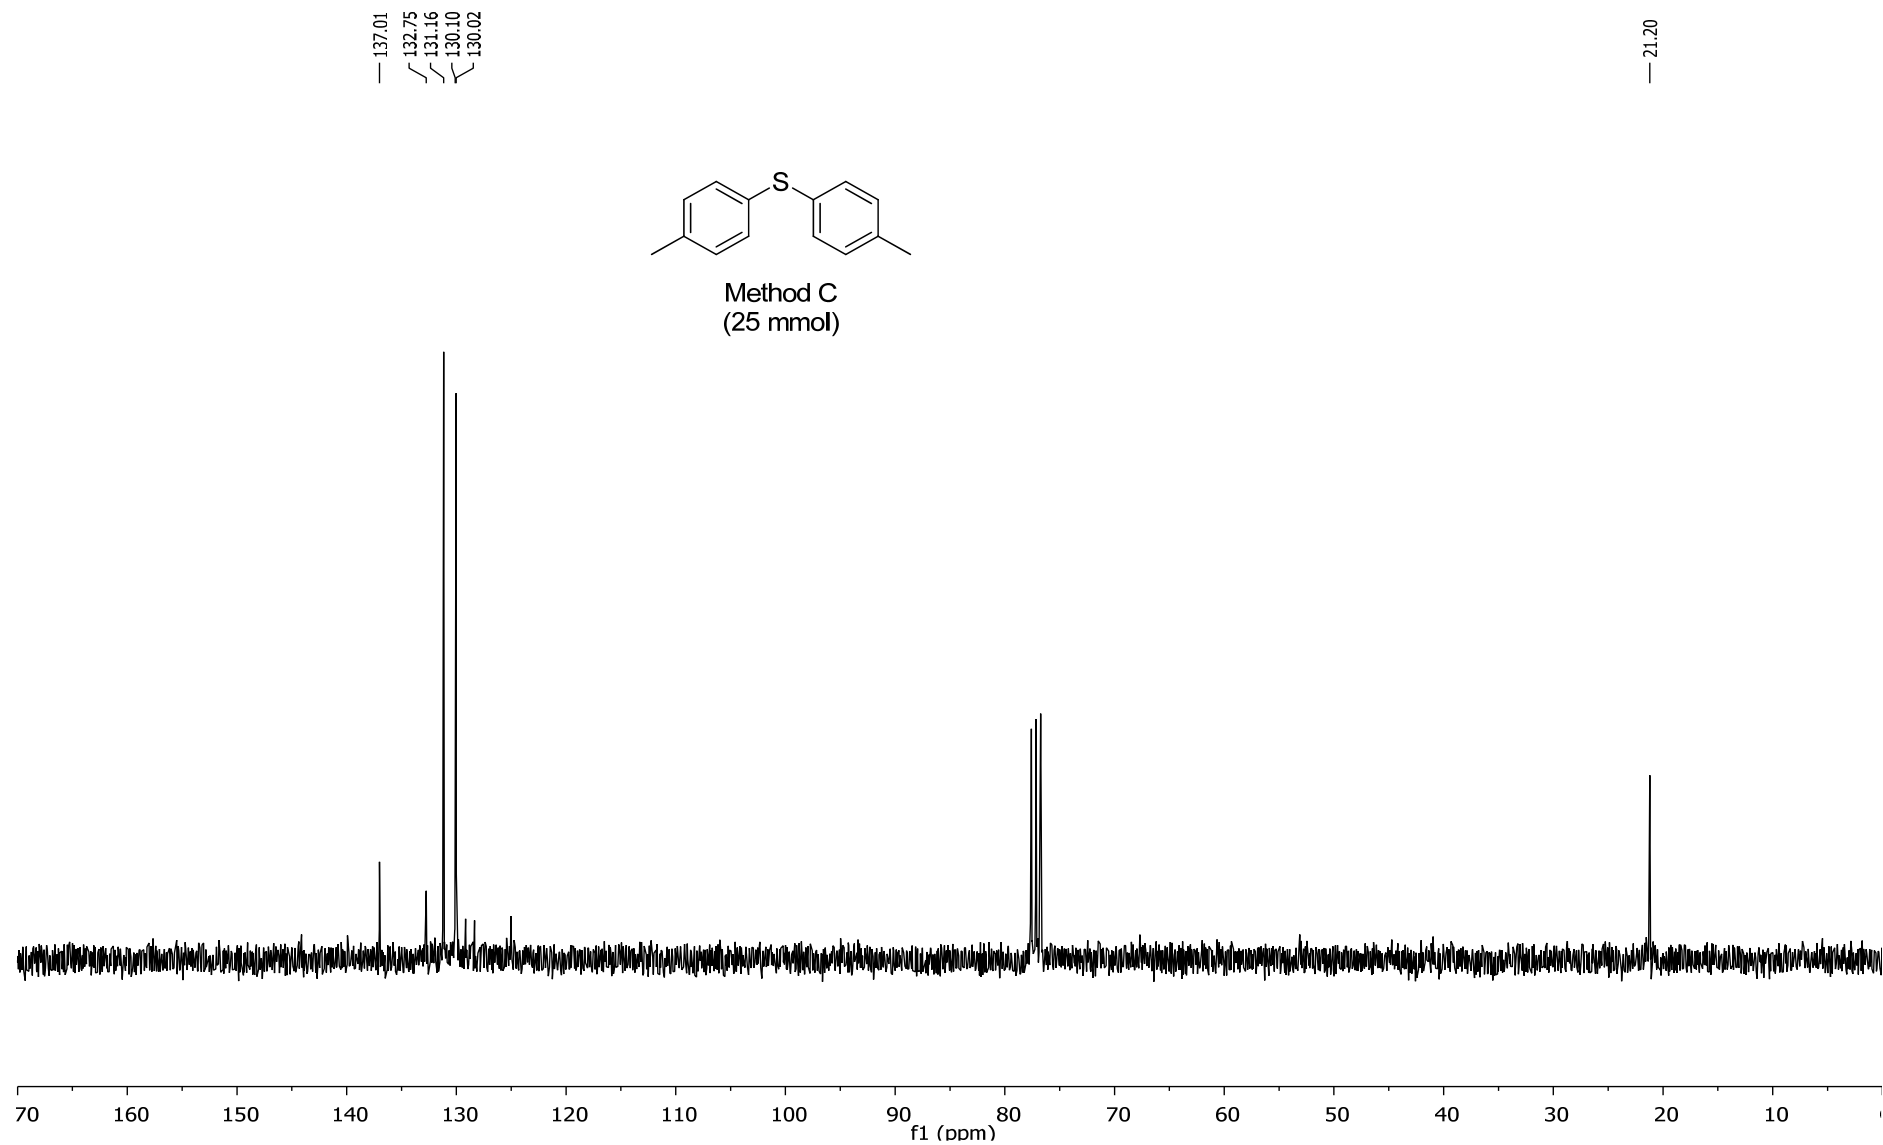

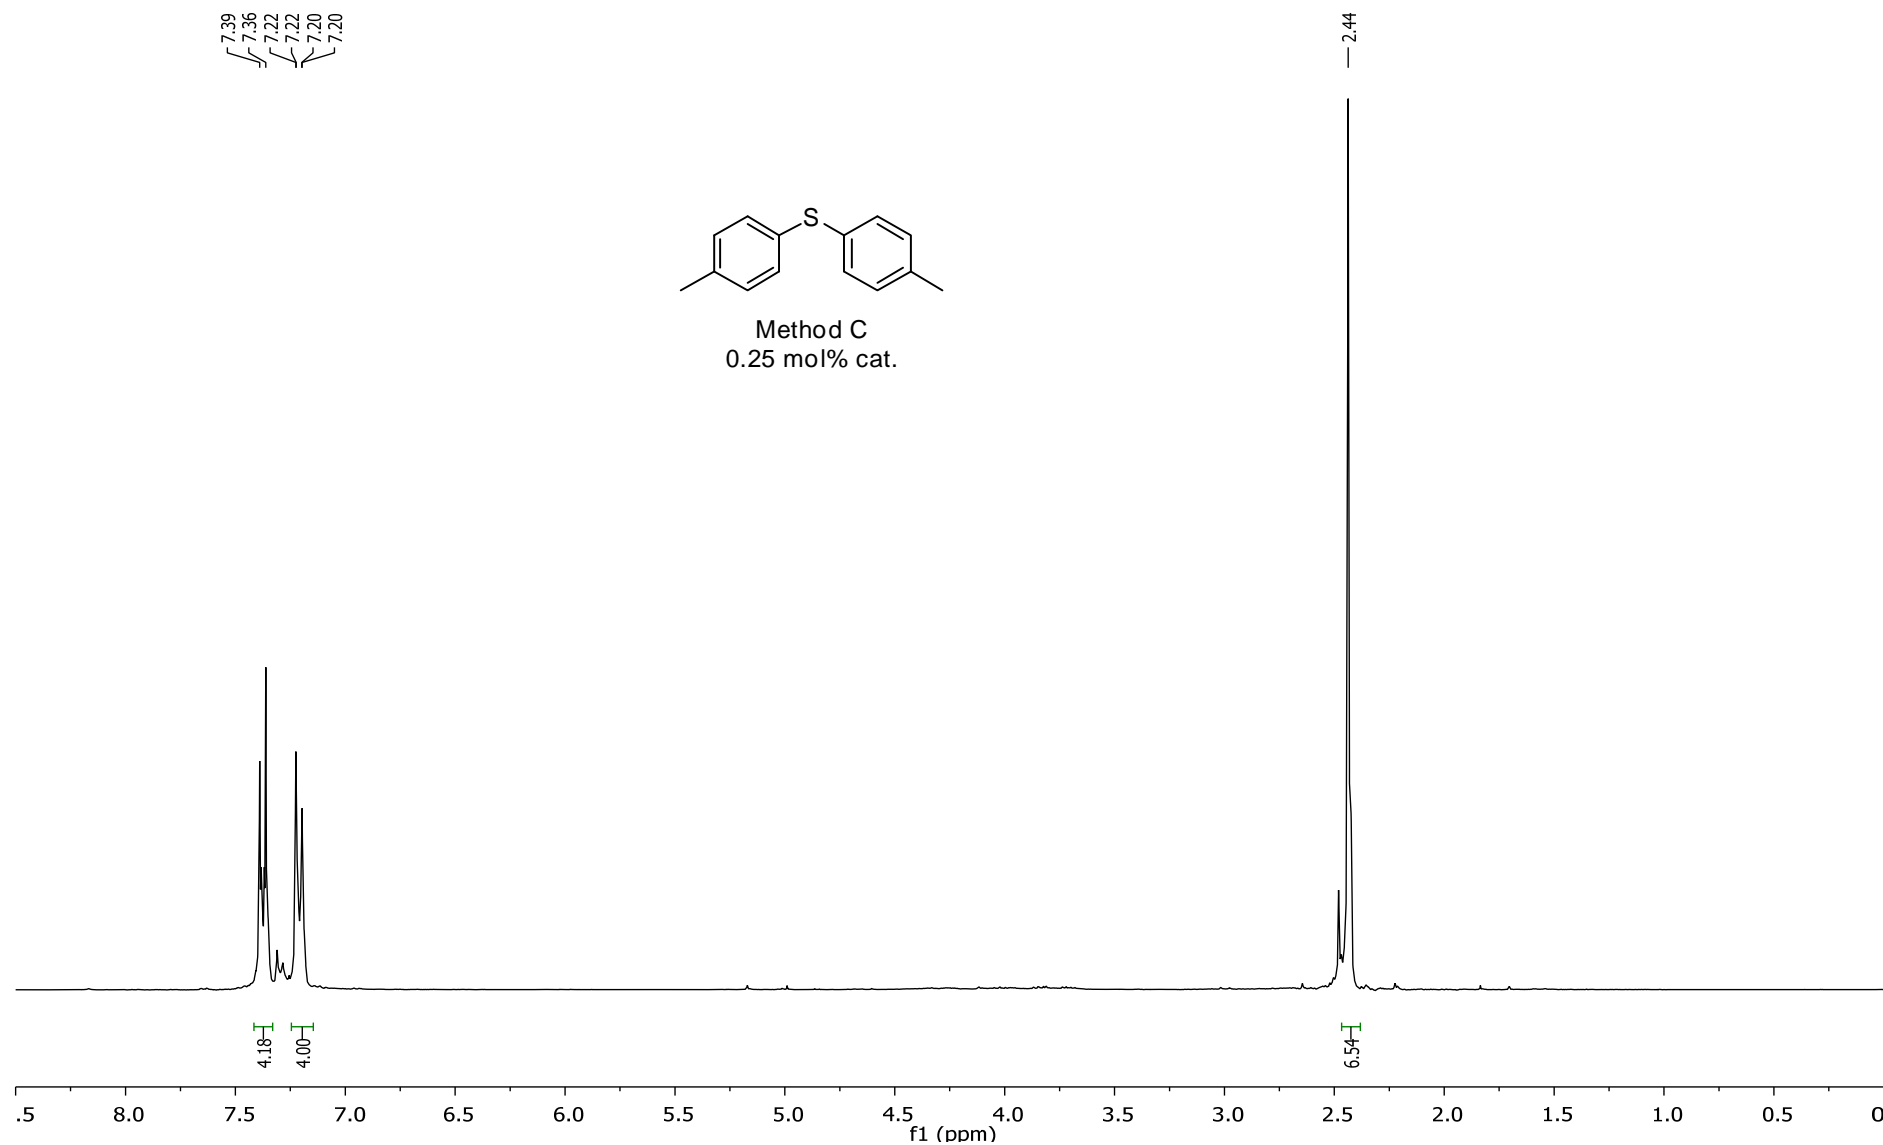

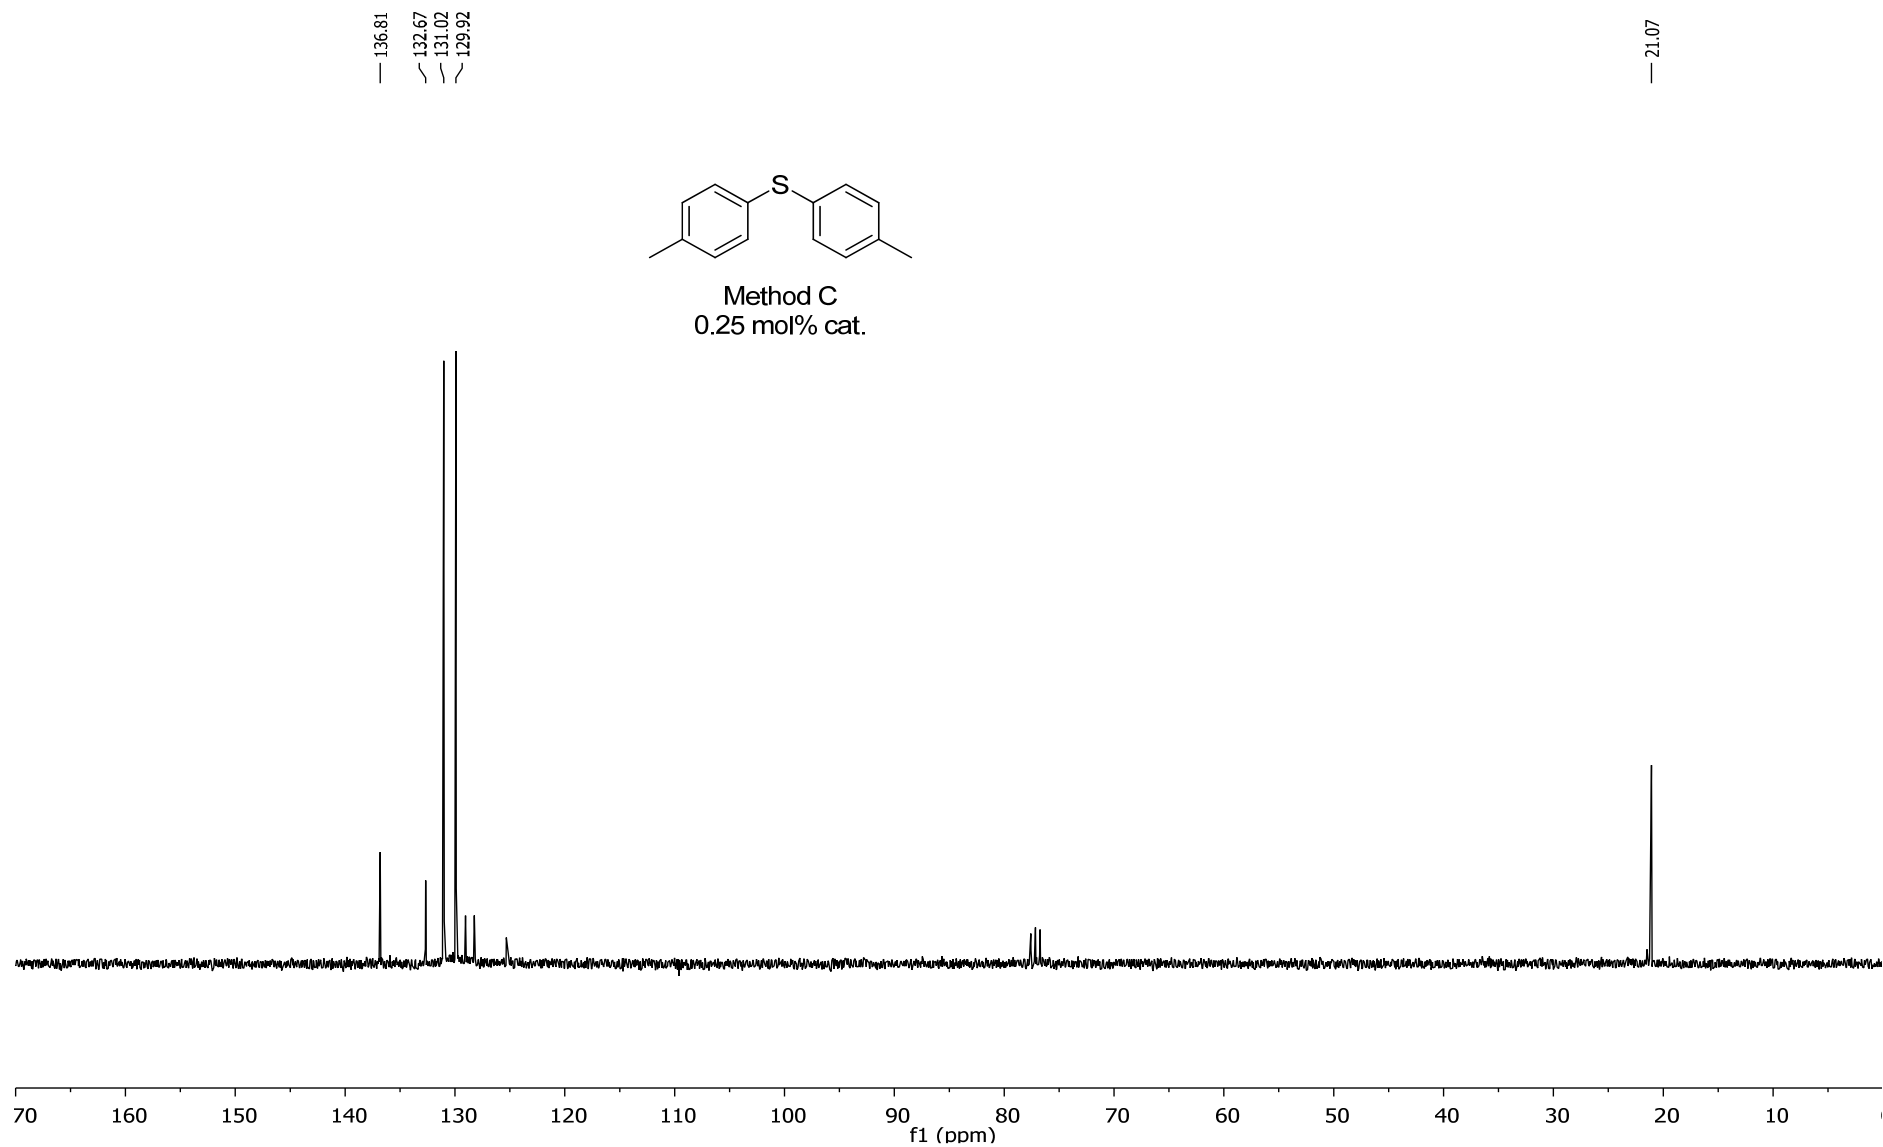

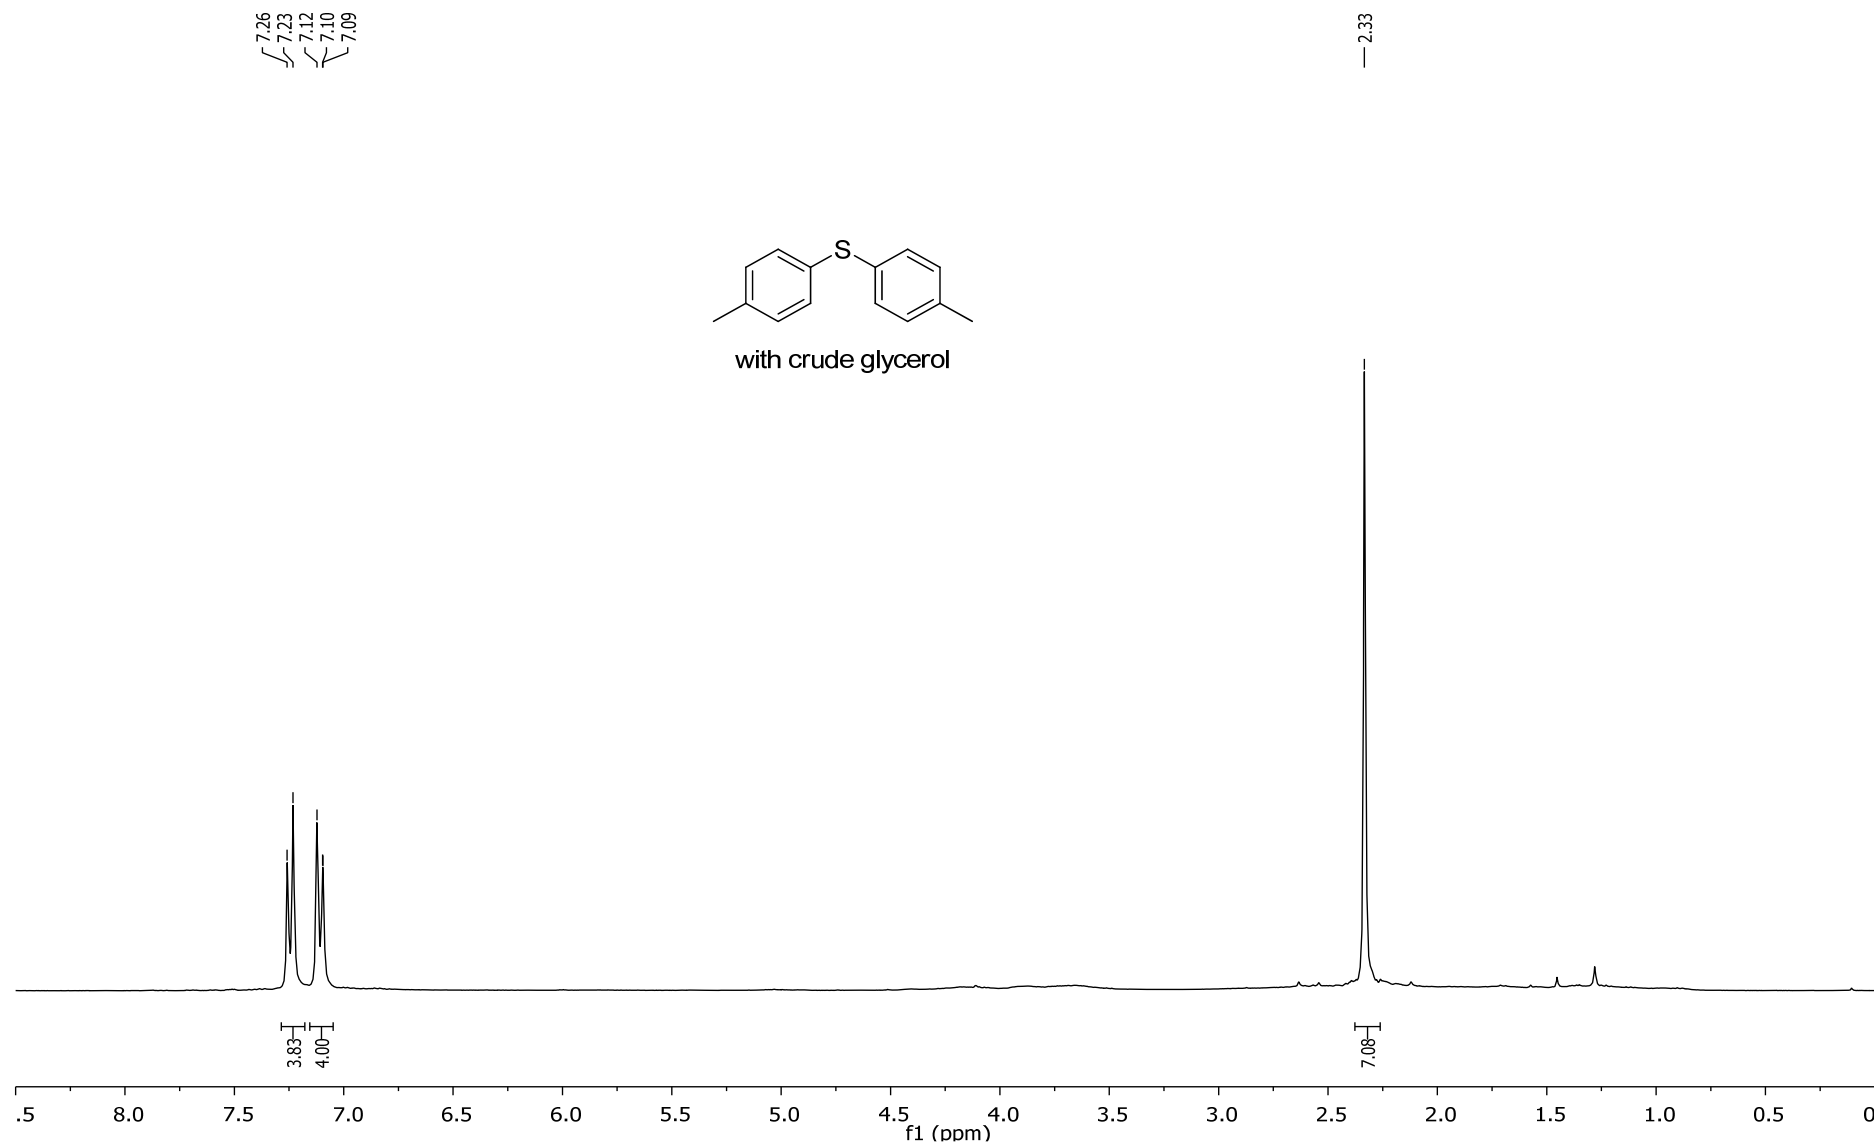



7.49  
7.48  
7.48  
7.47  
7.46  
7.46  
7.46  
7.45  
7.42  
7.41  
7.41  
7.39  
7.39  
7.39  
7.38  
7.37  
7.36  
7.36  
7.35  
7.35  
7.33

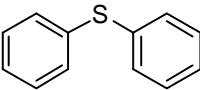

Method A

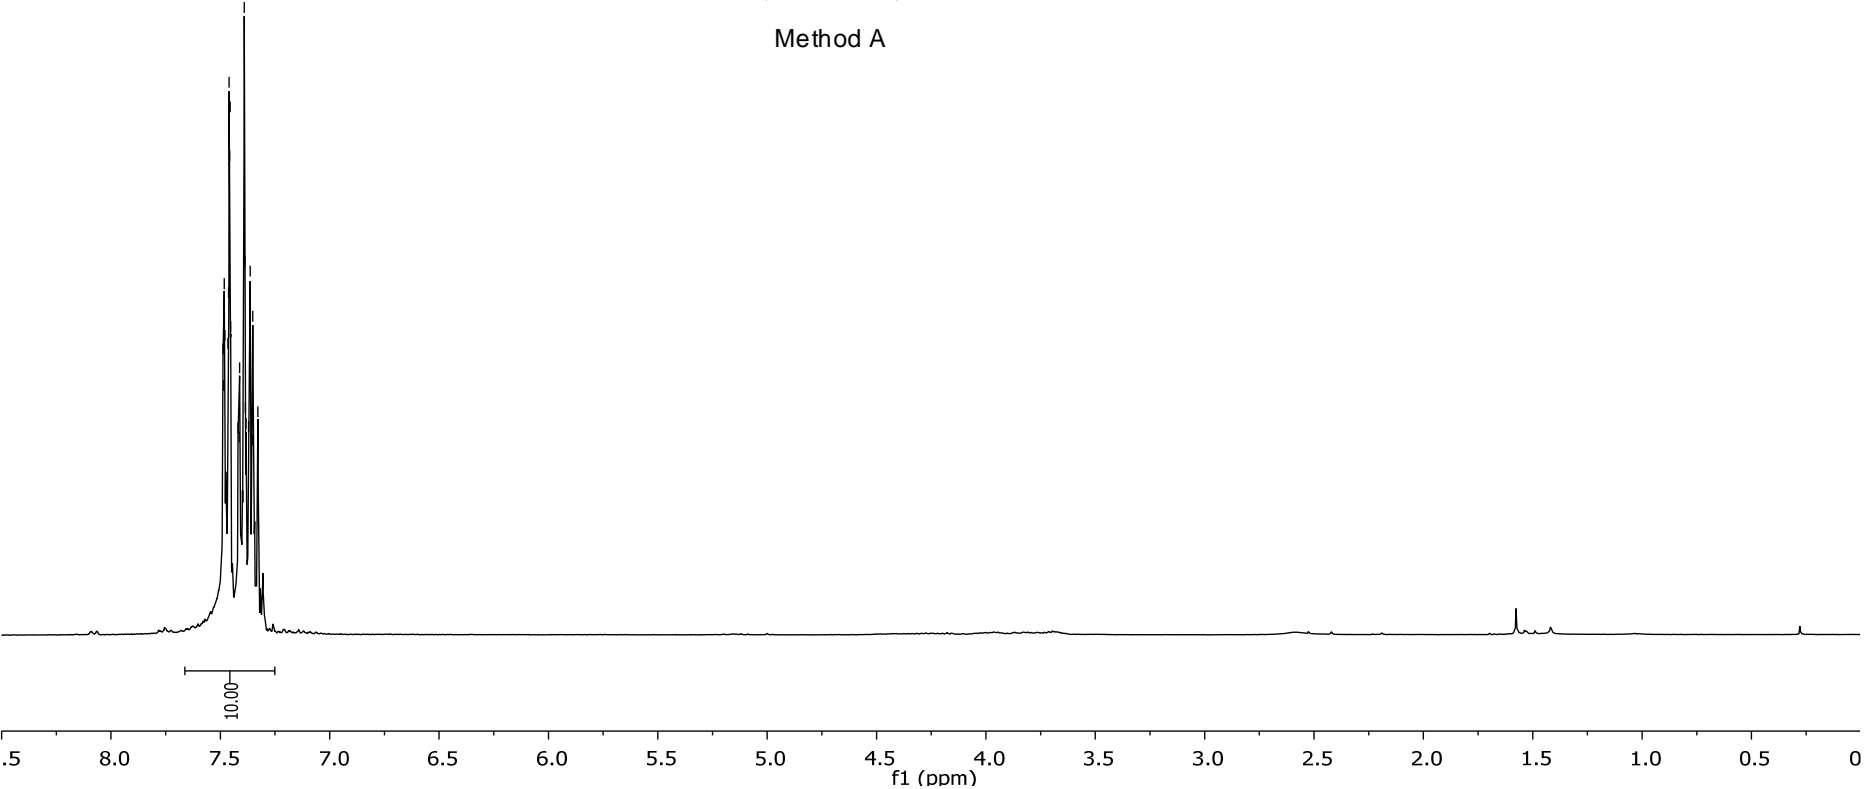

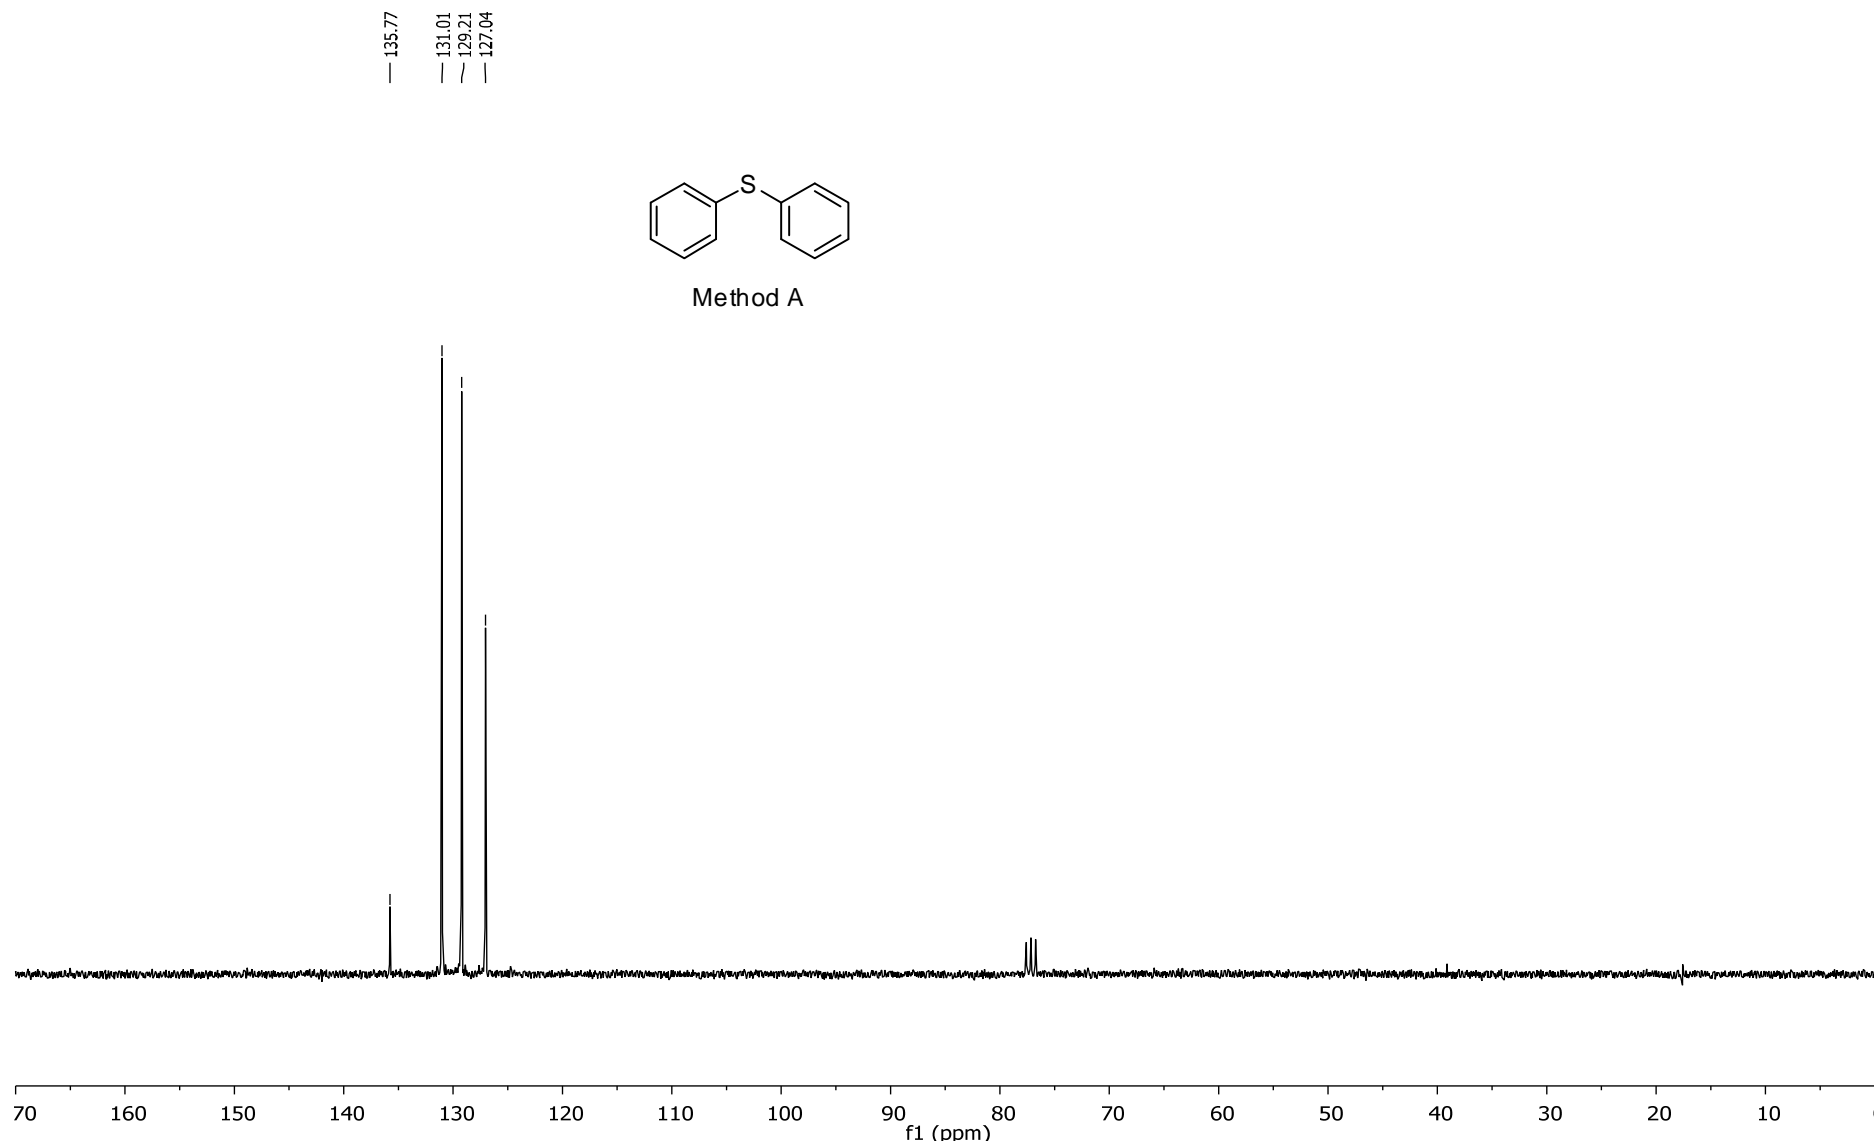

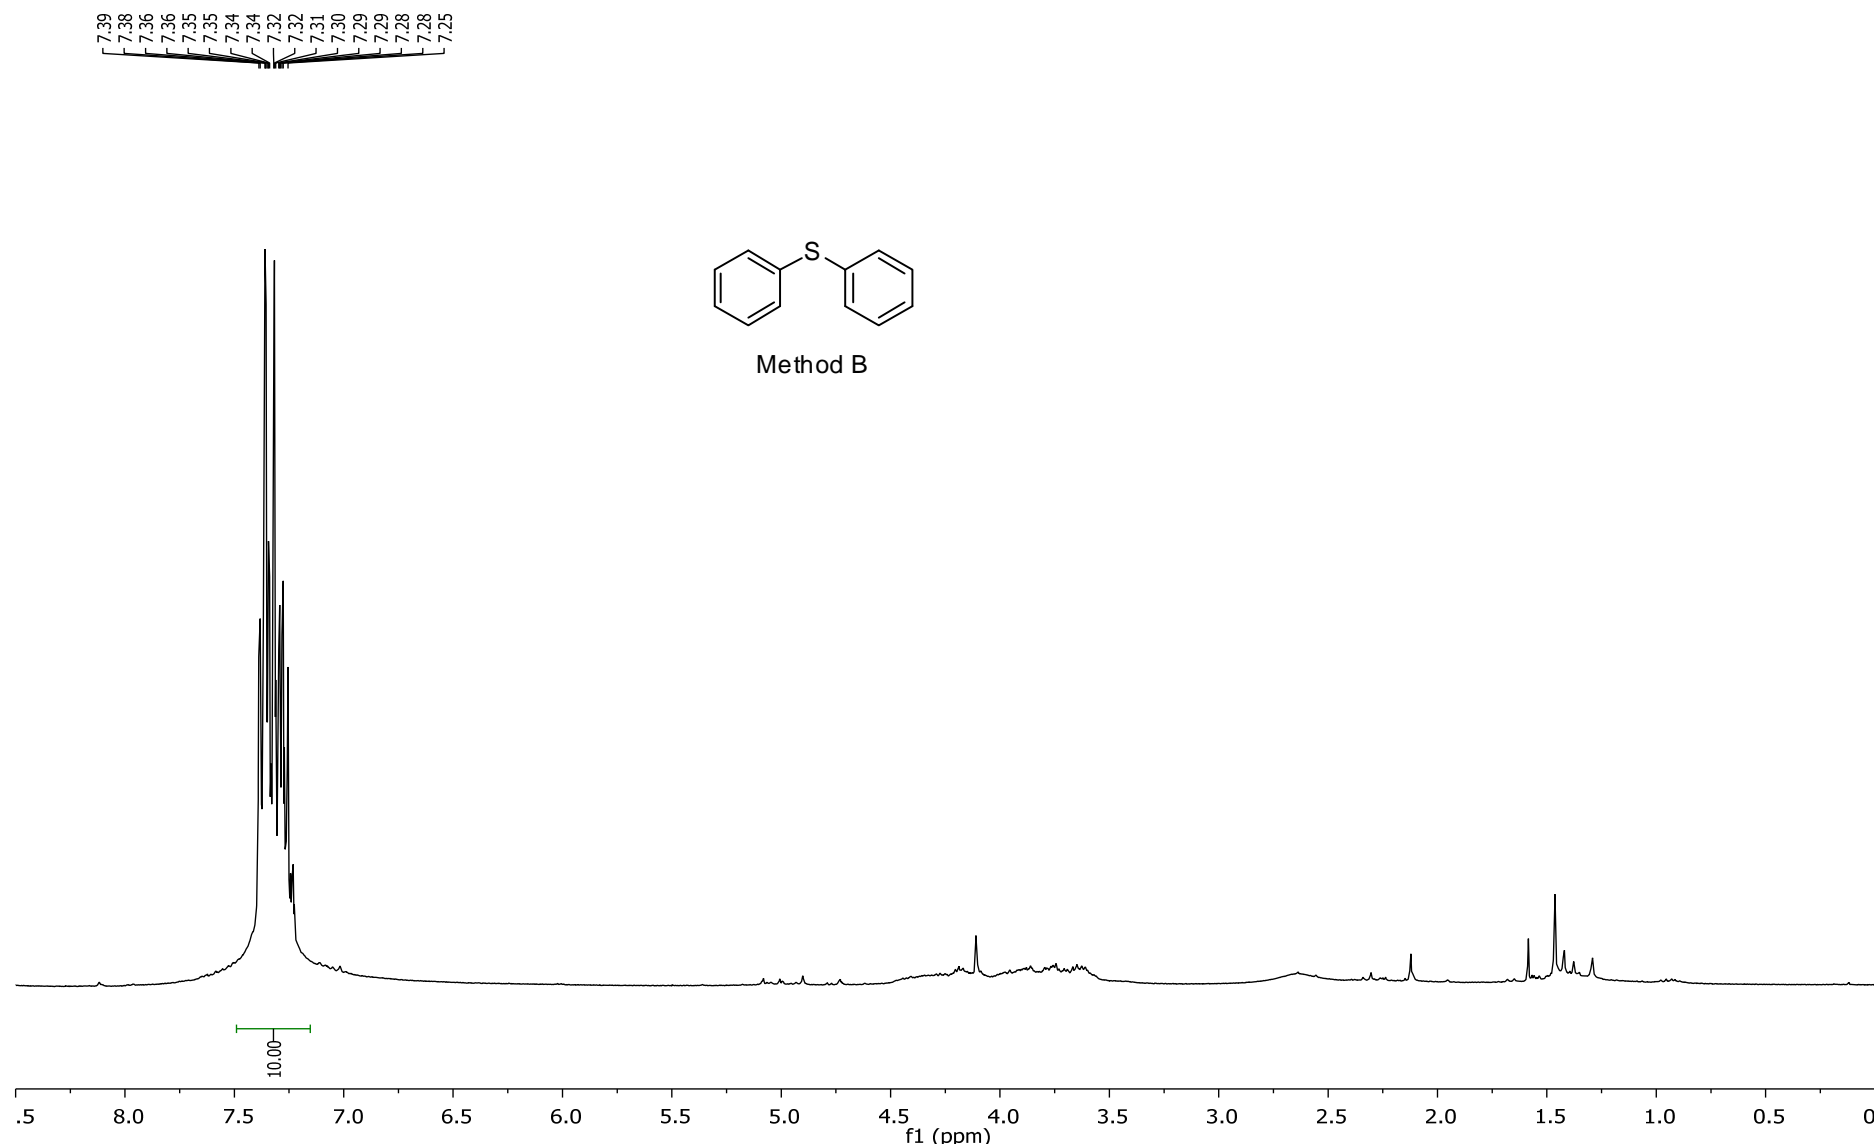

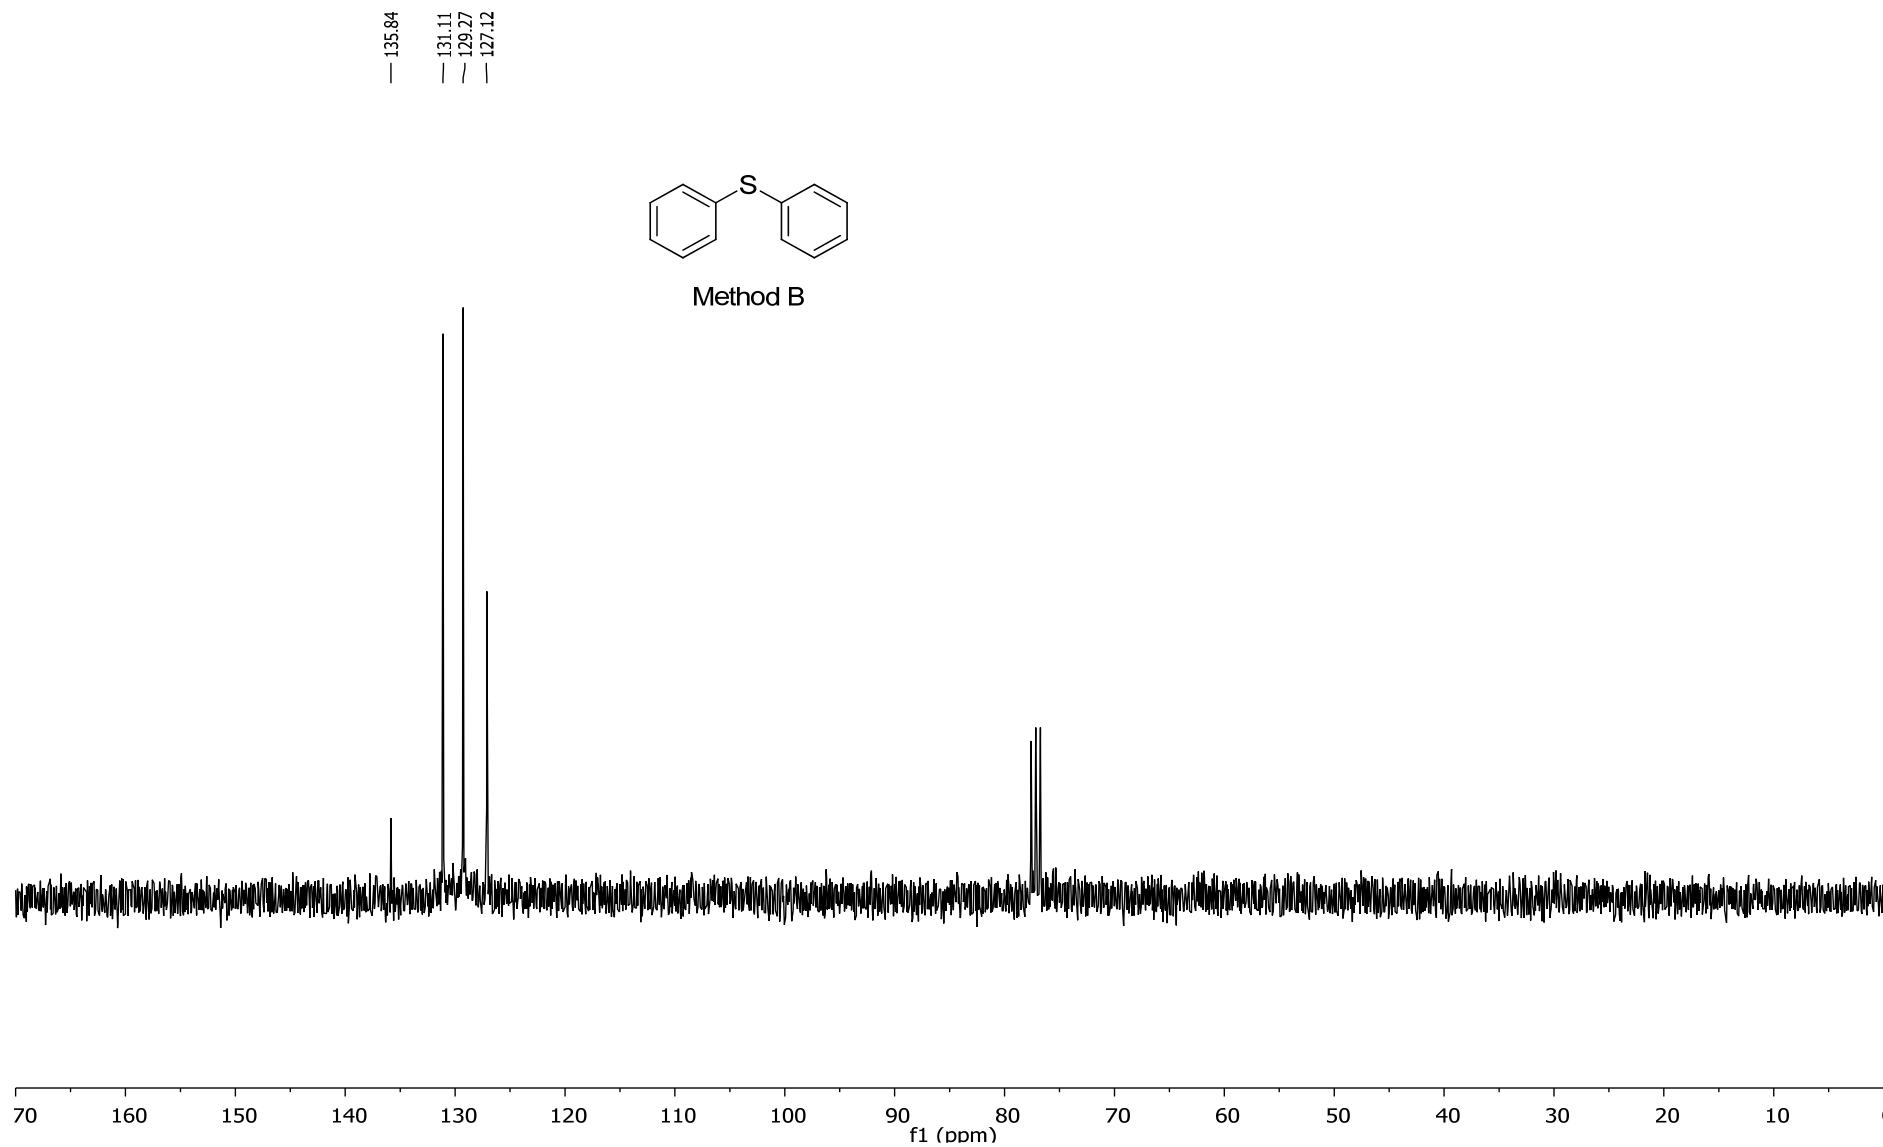

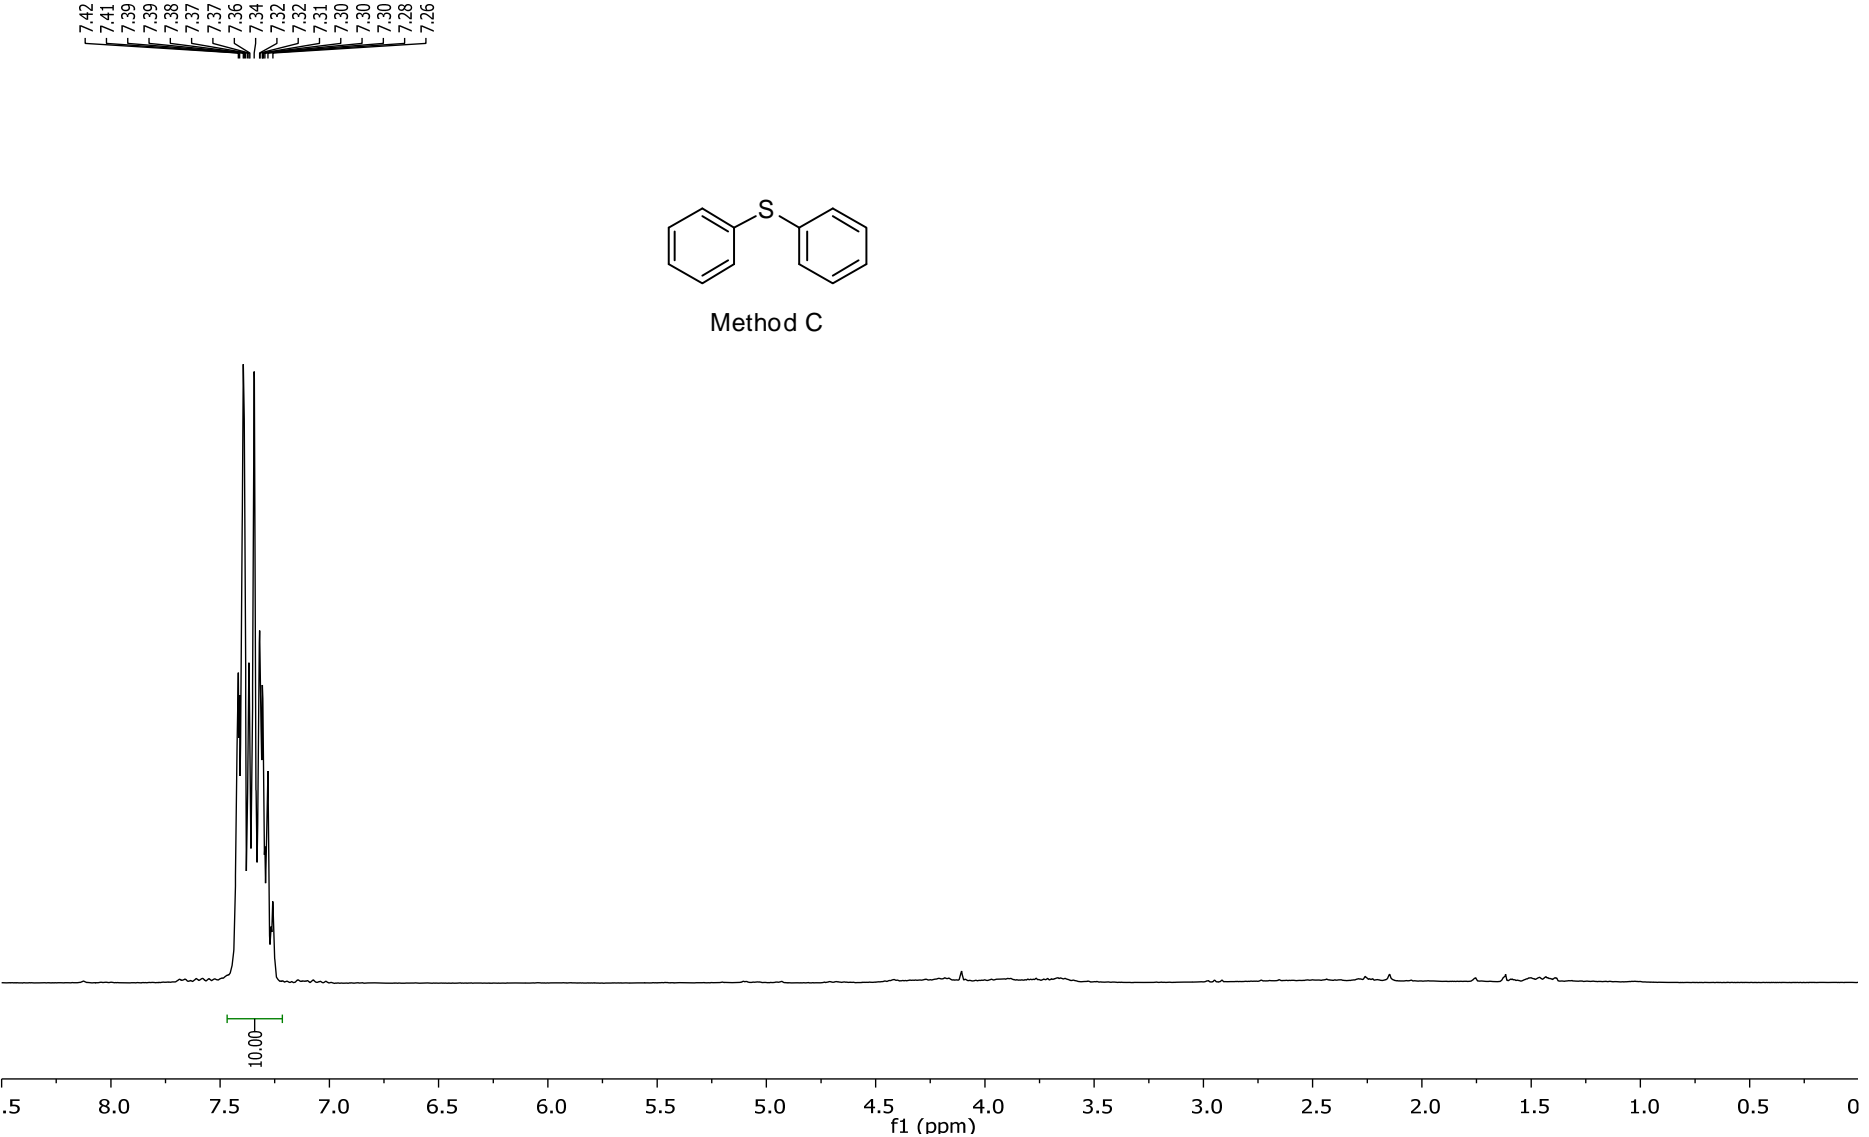

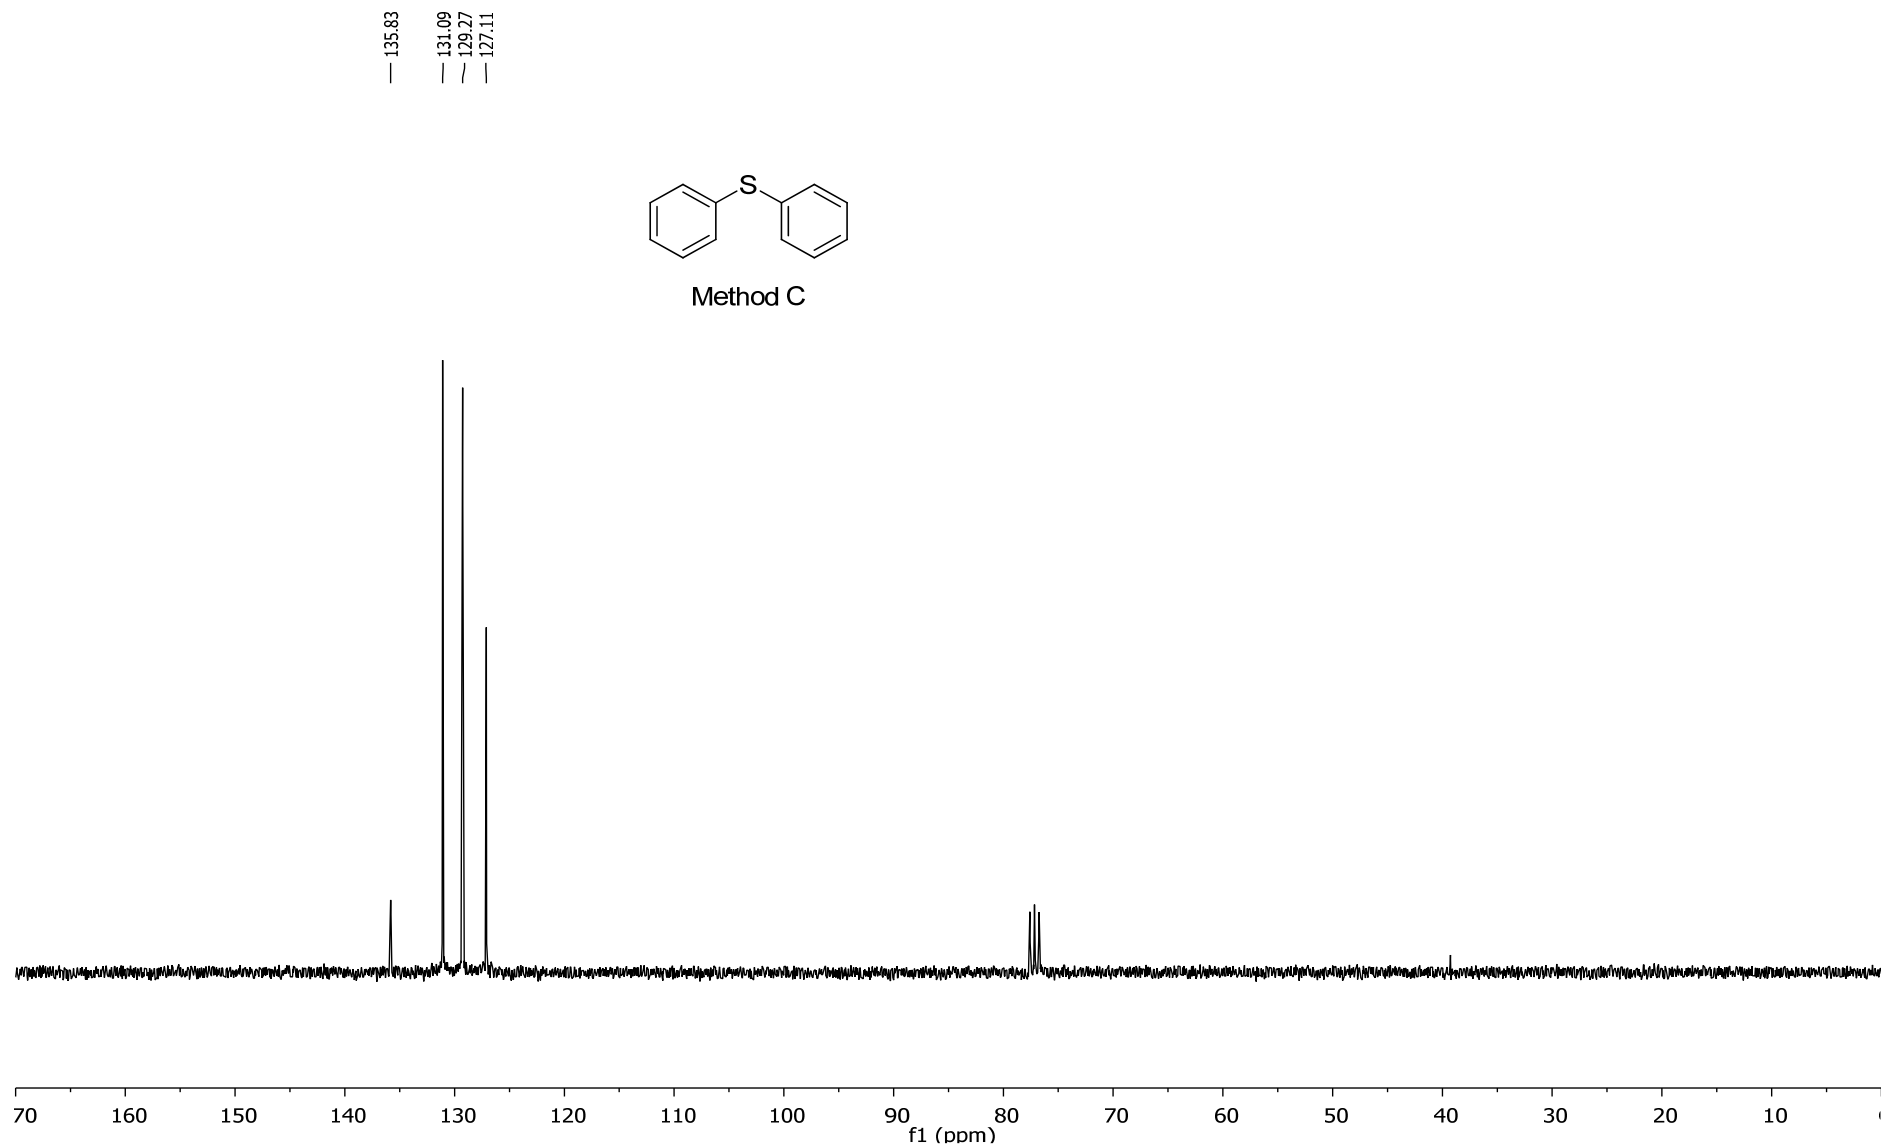

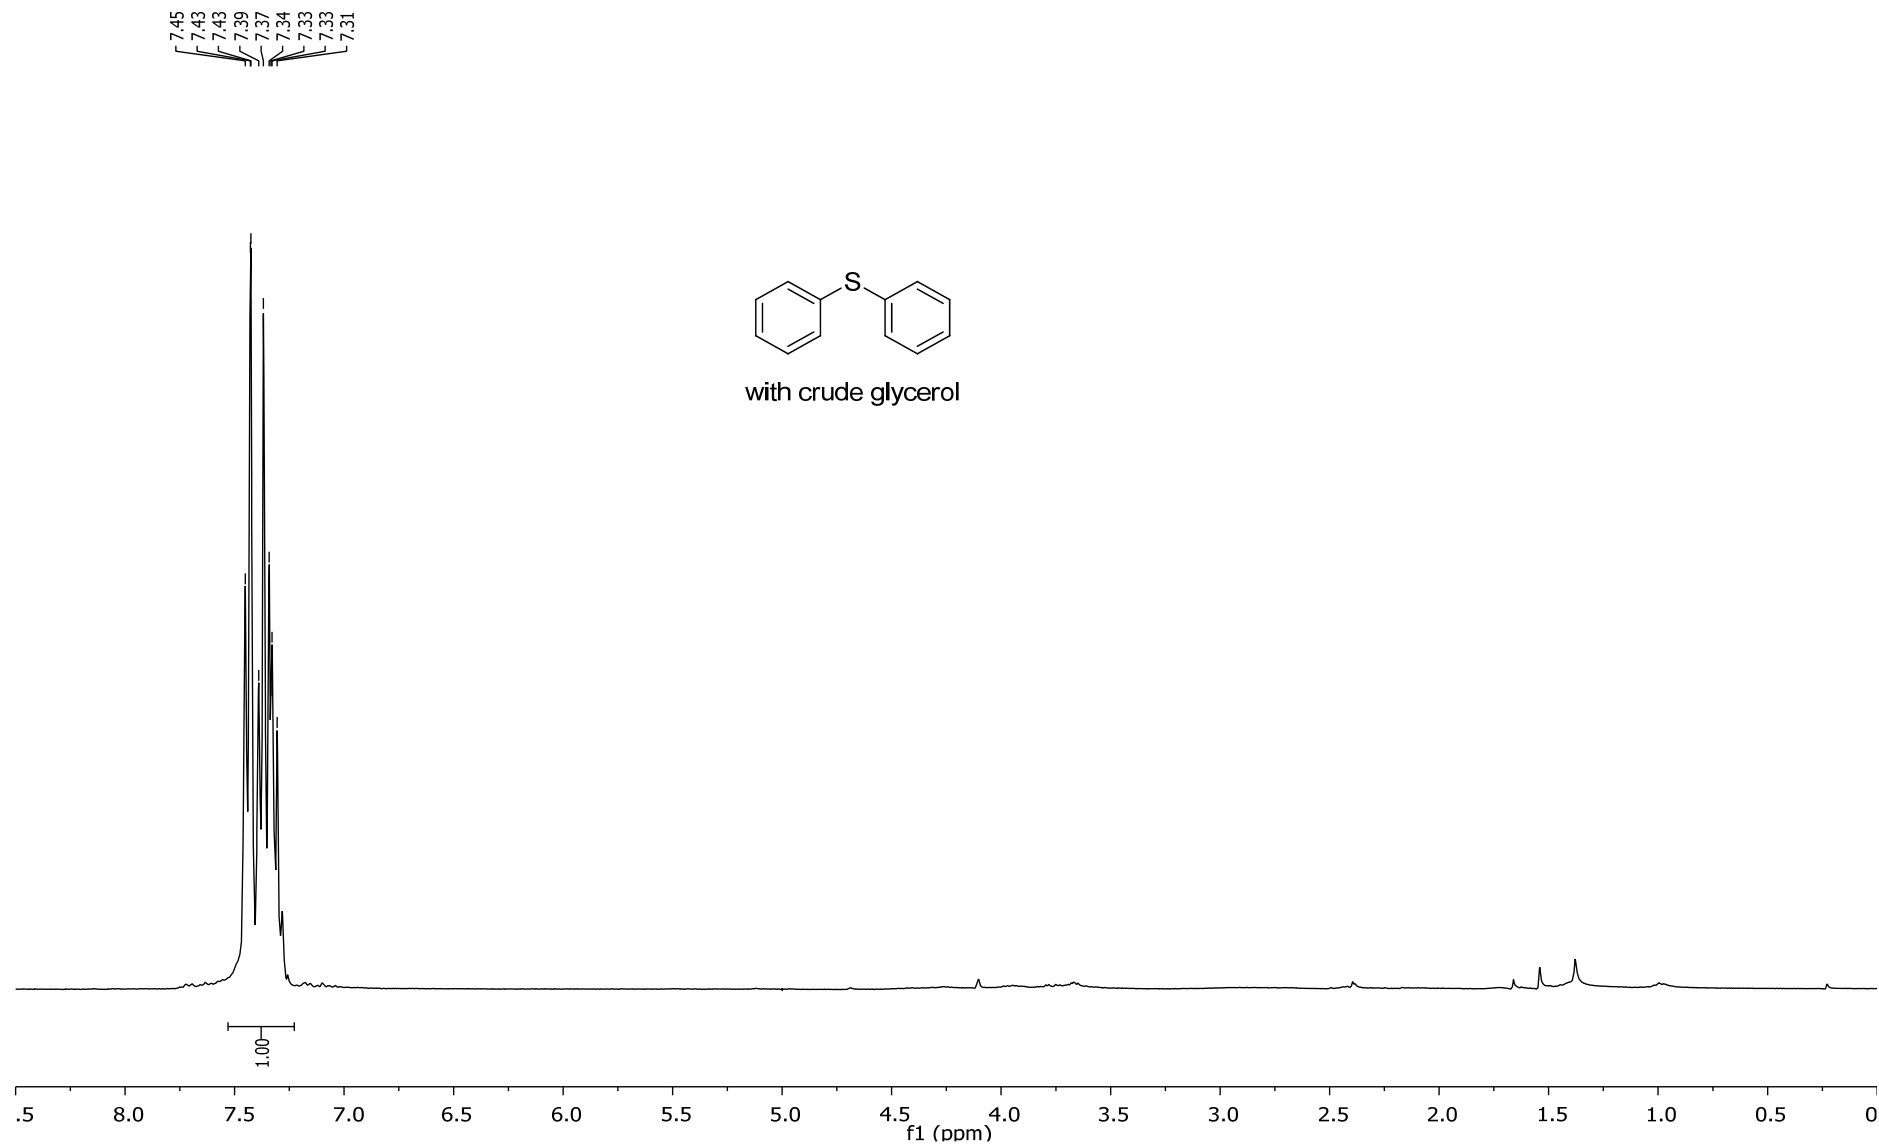

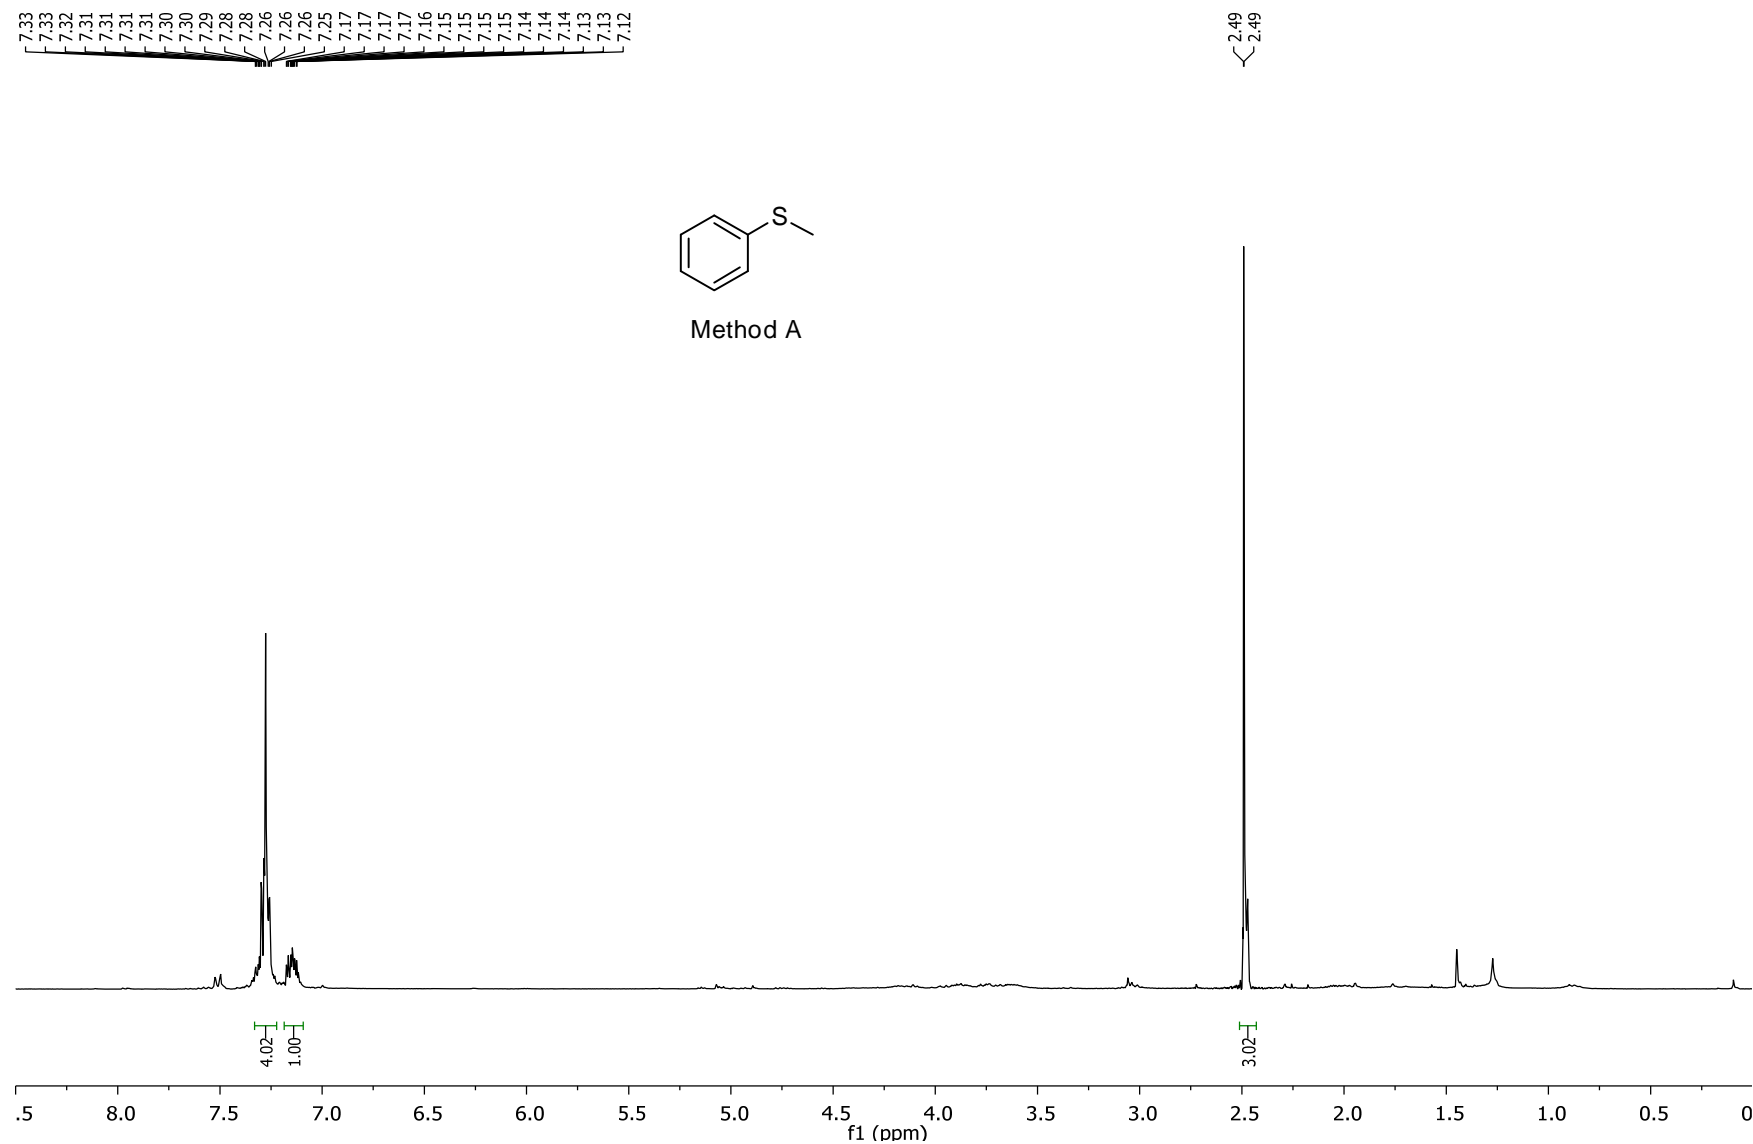



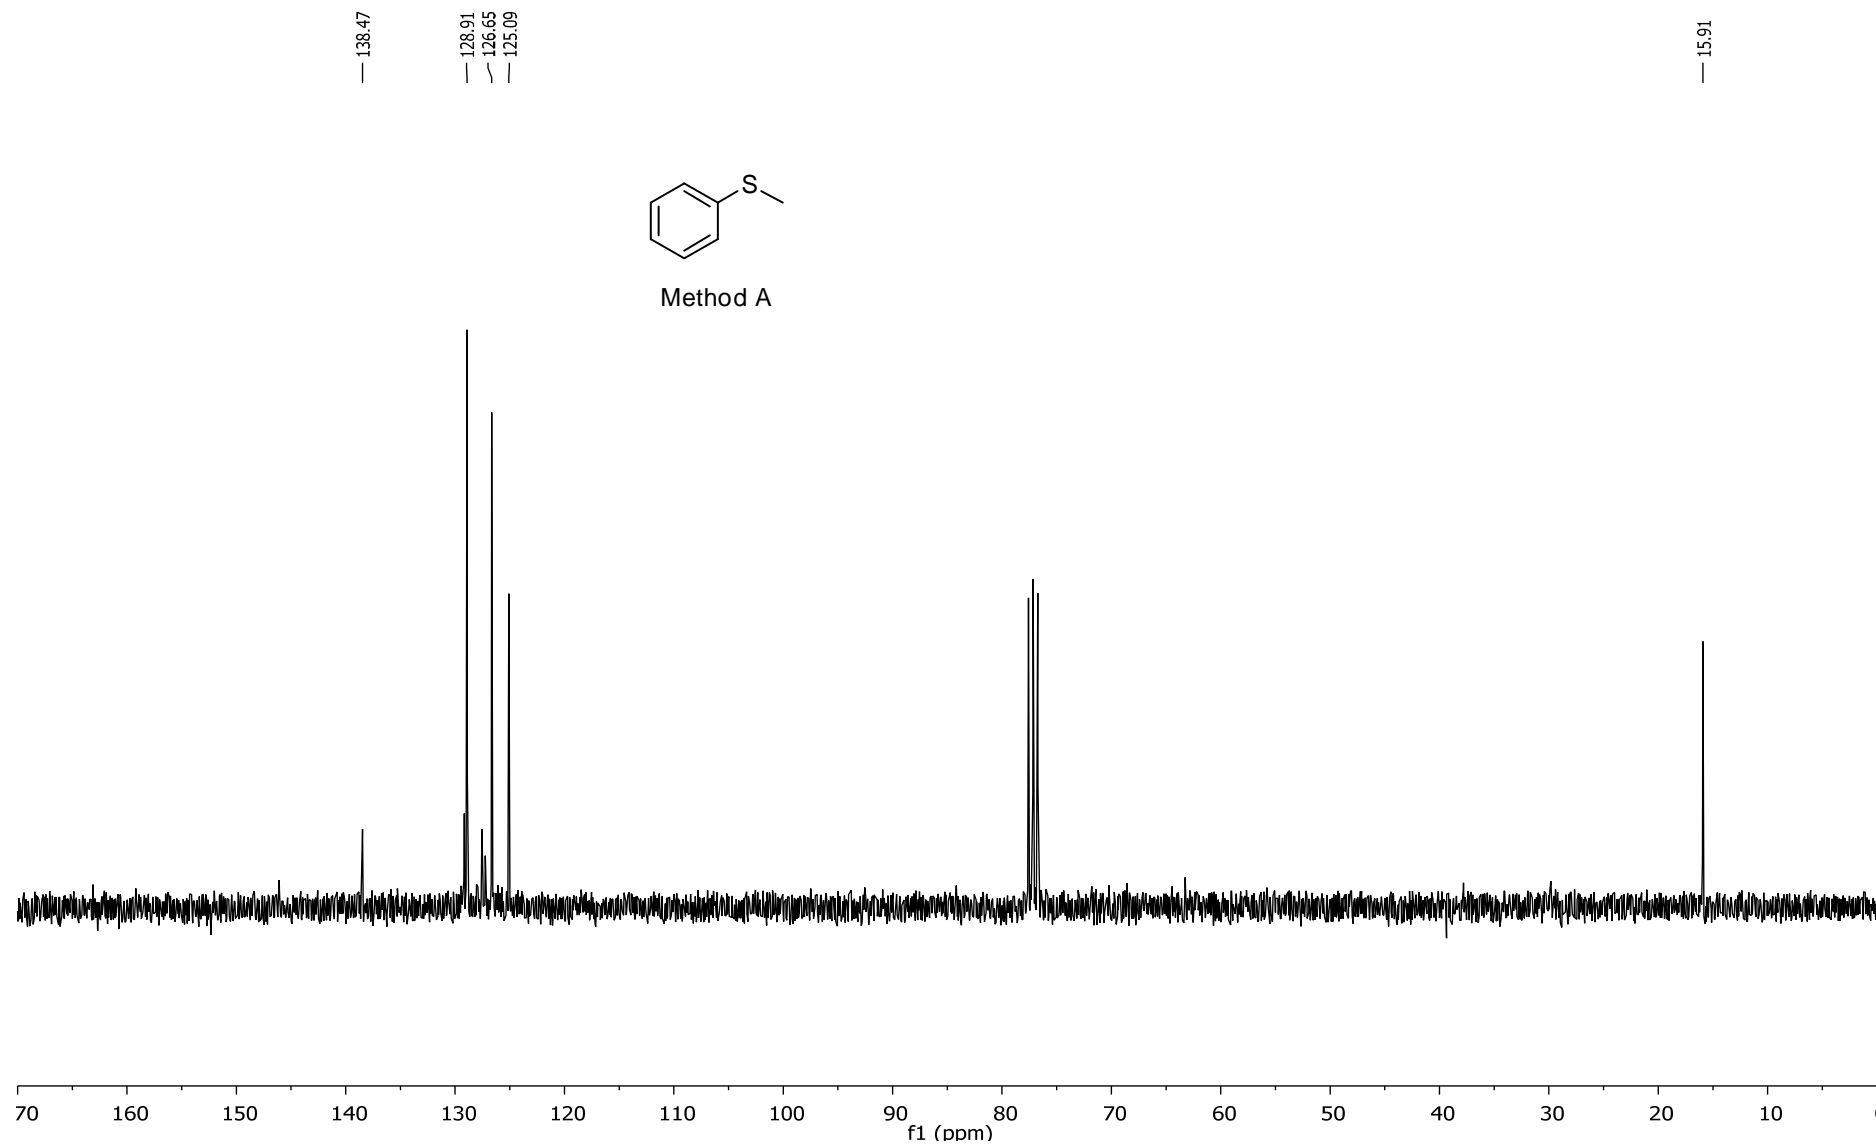

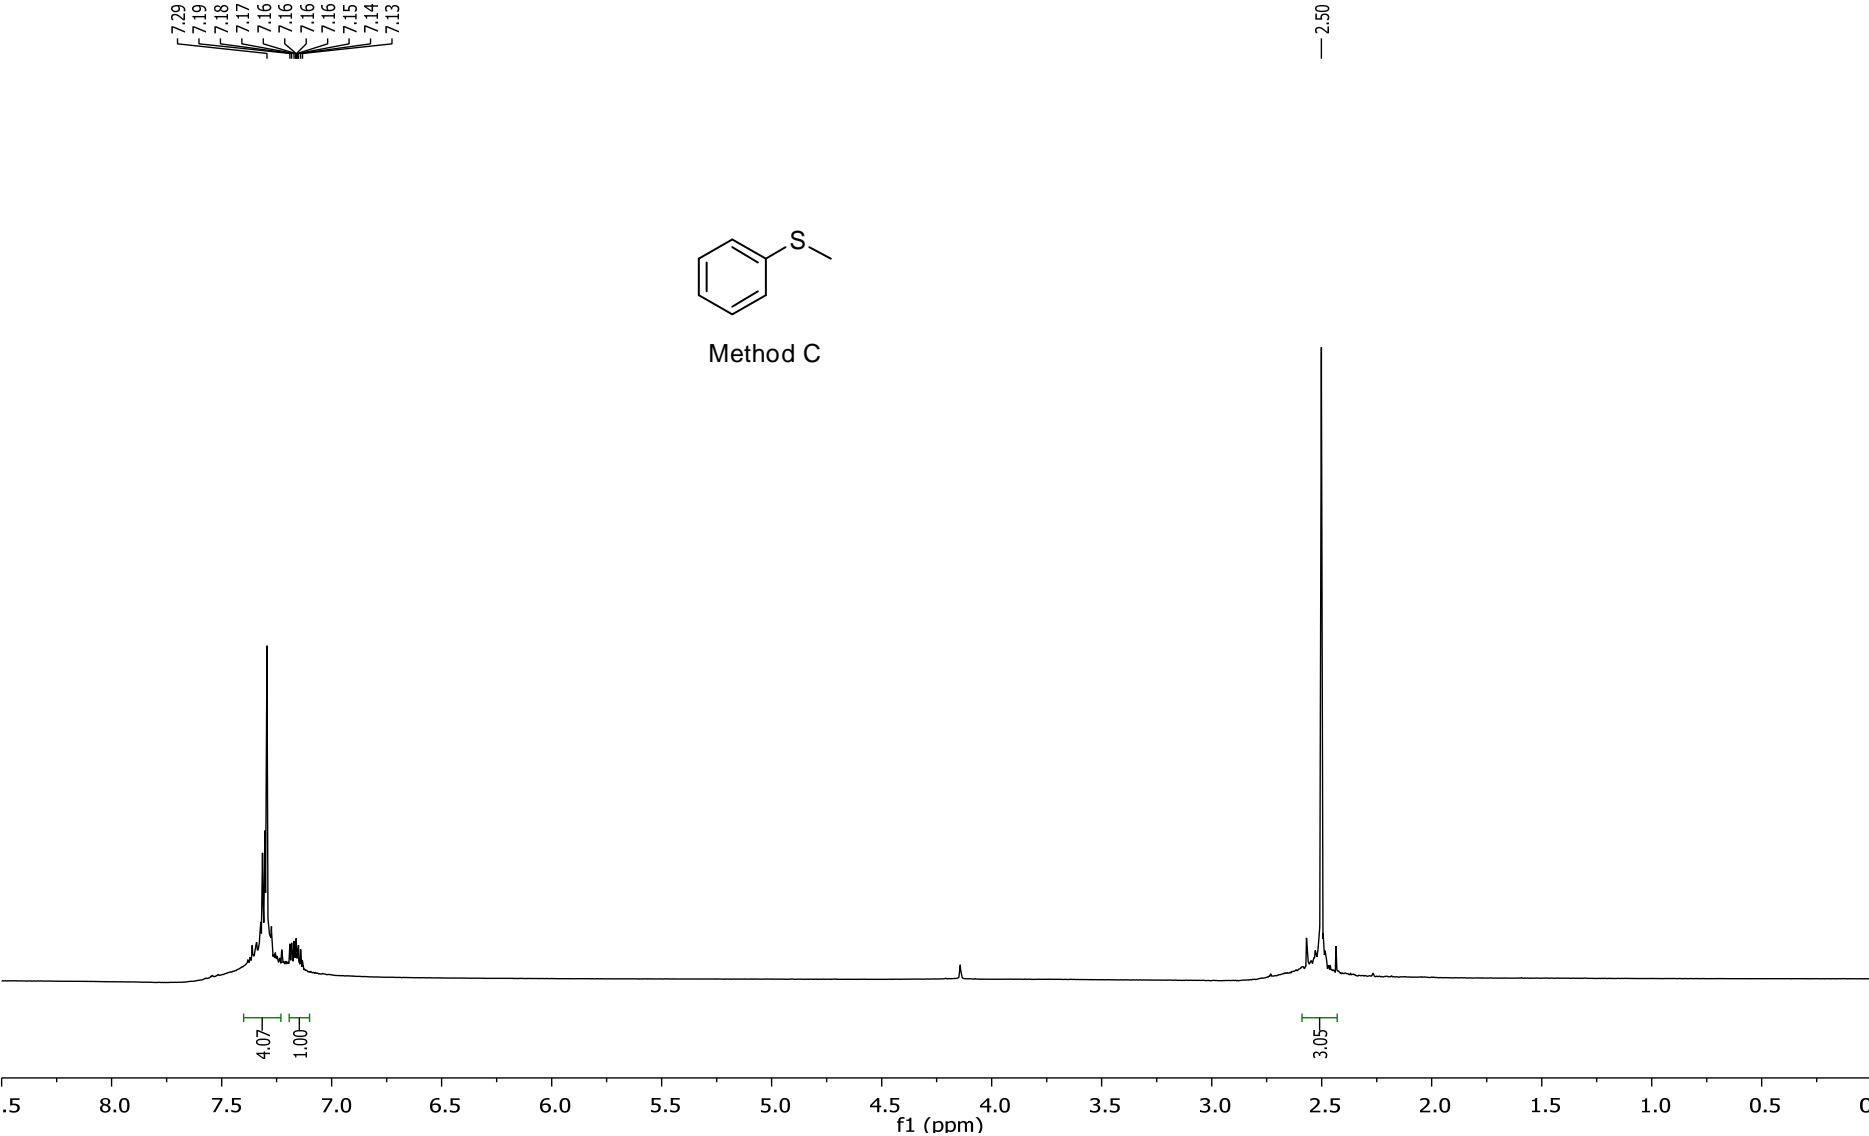

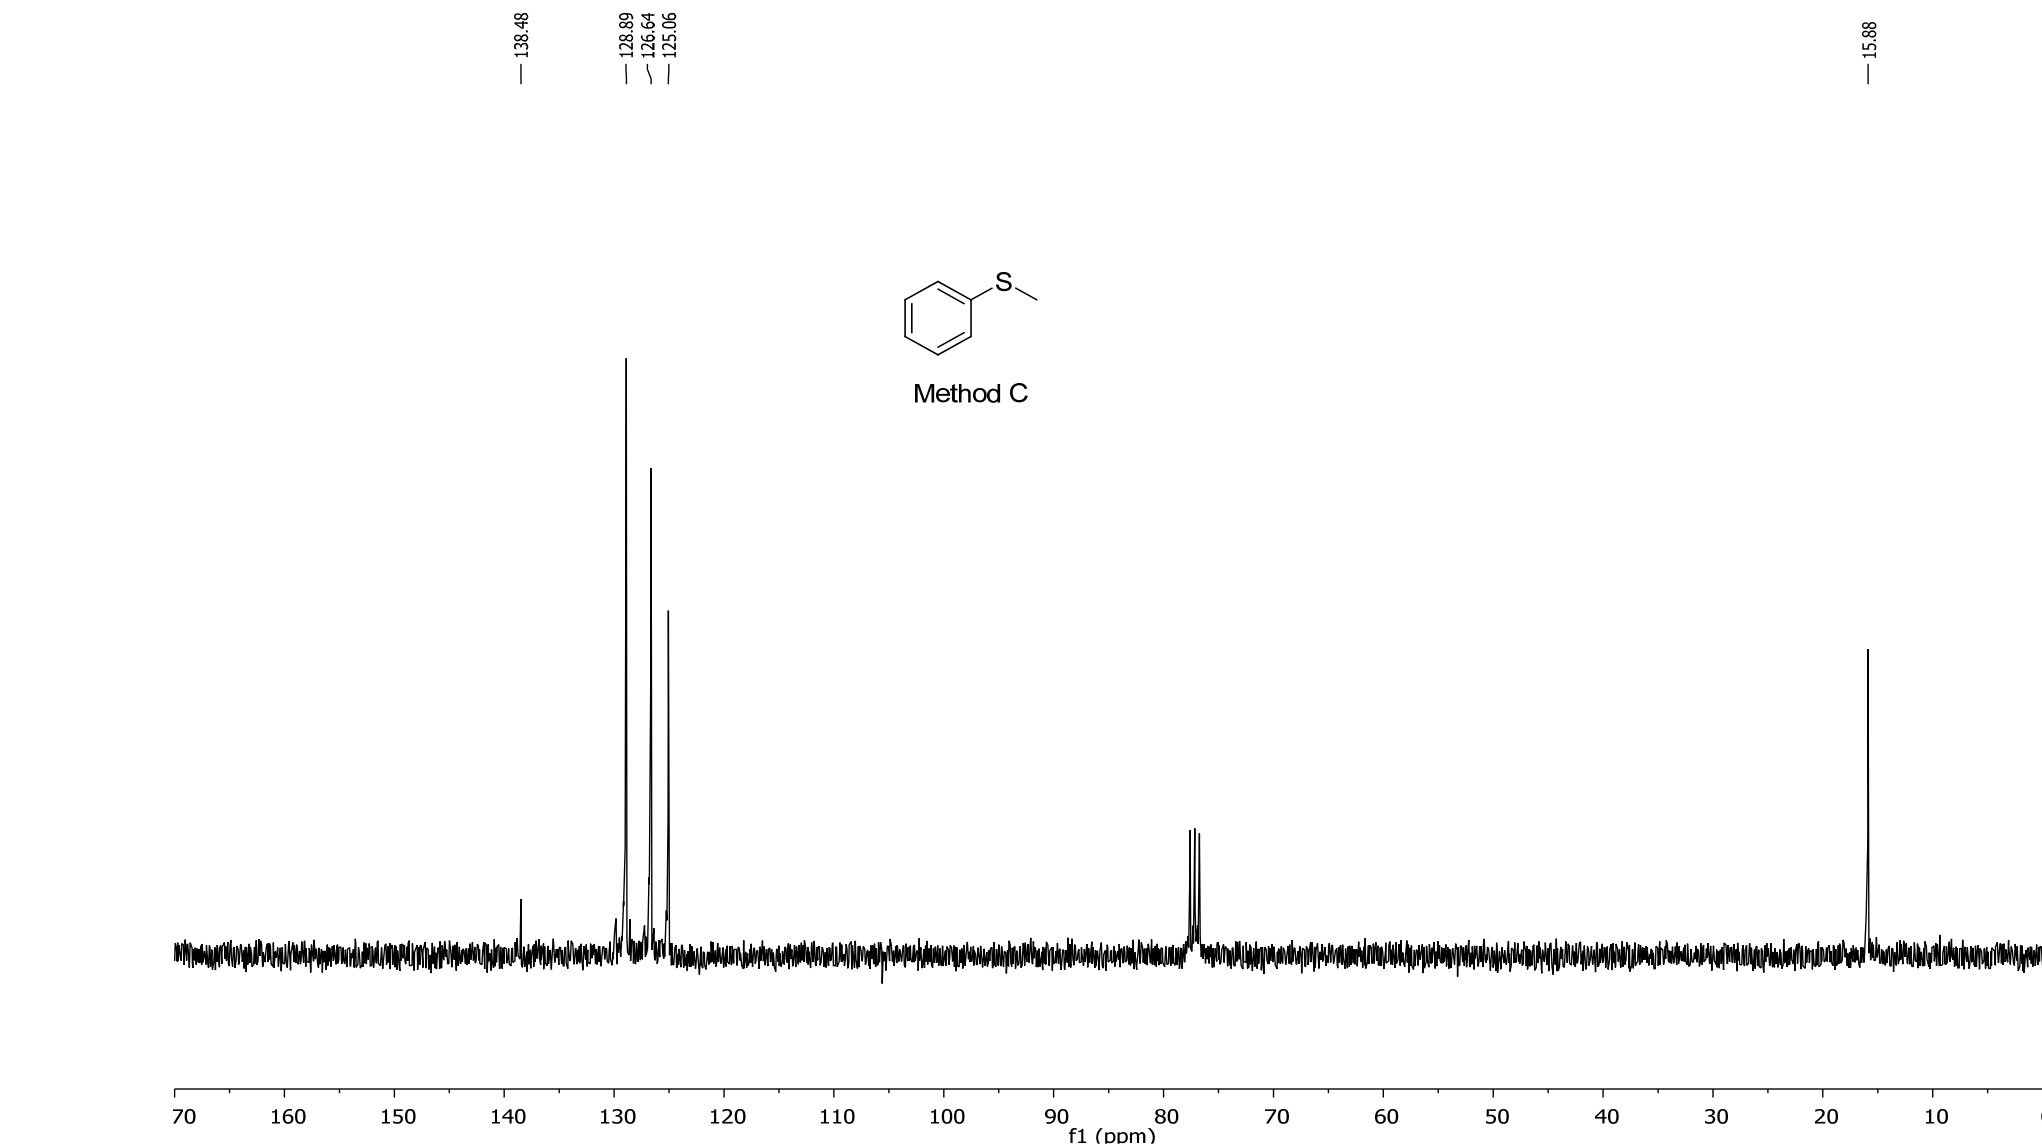

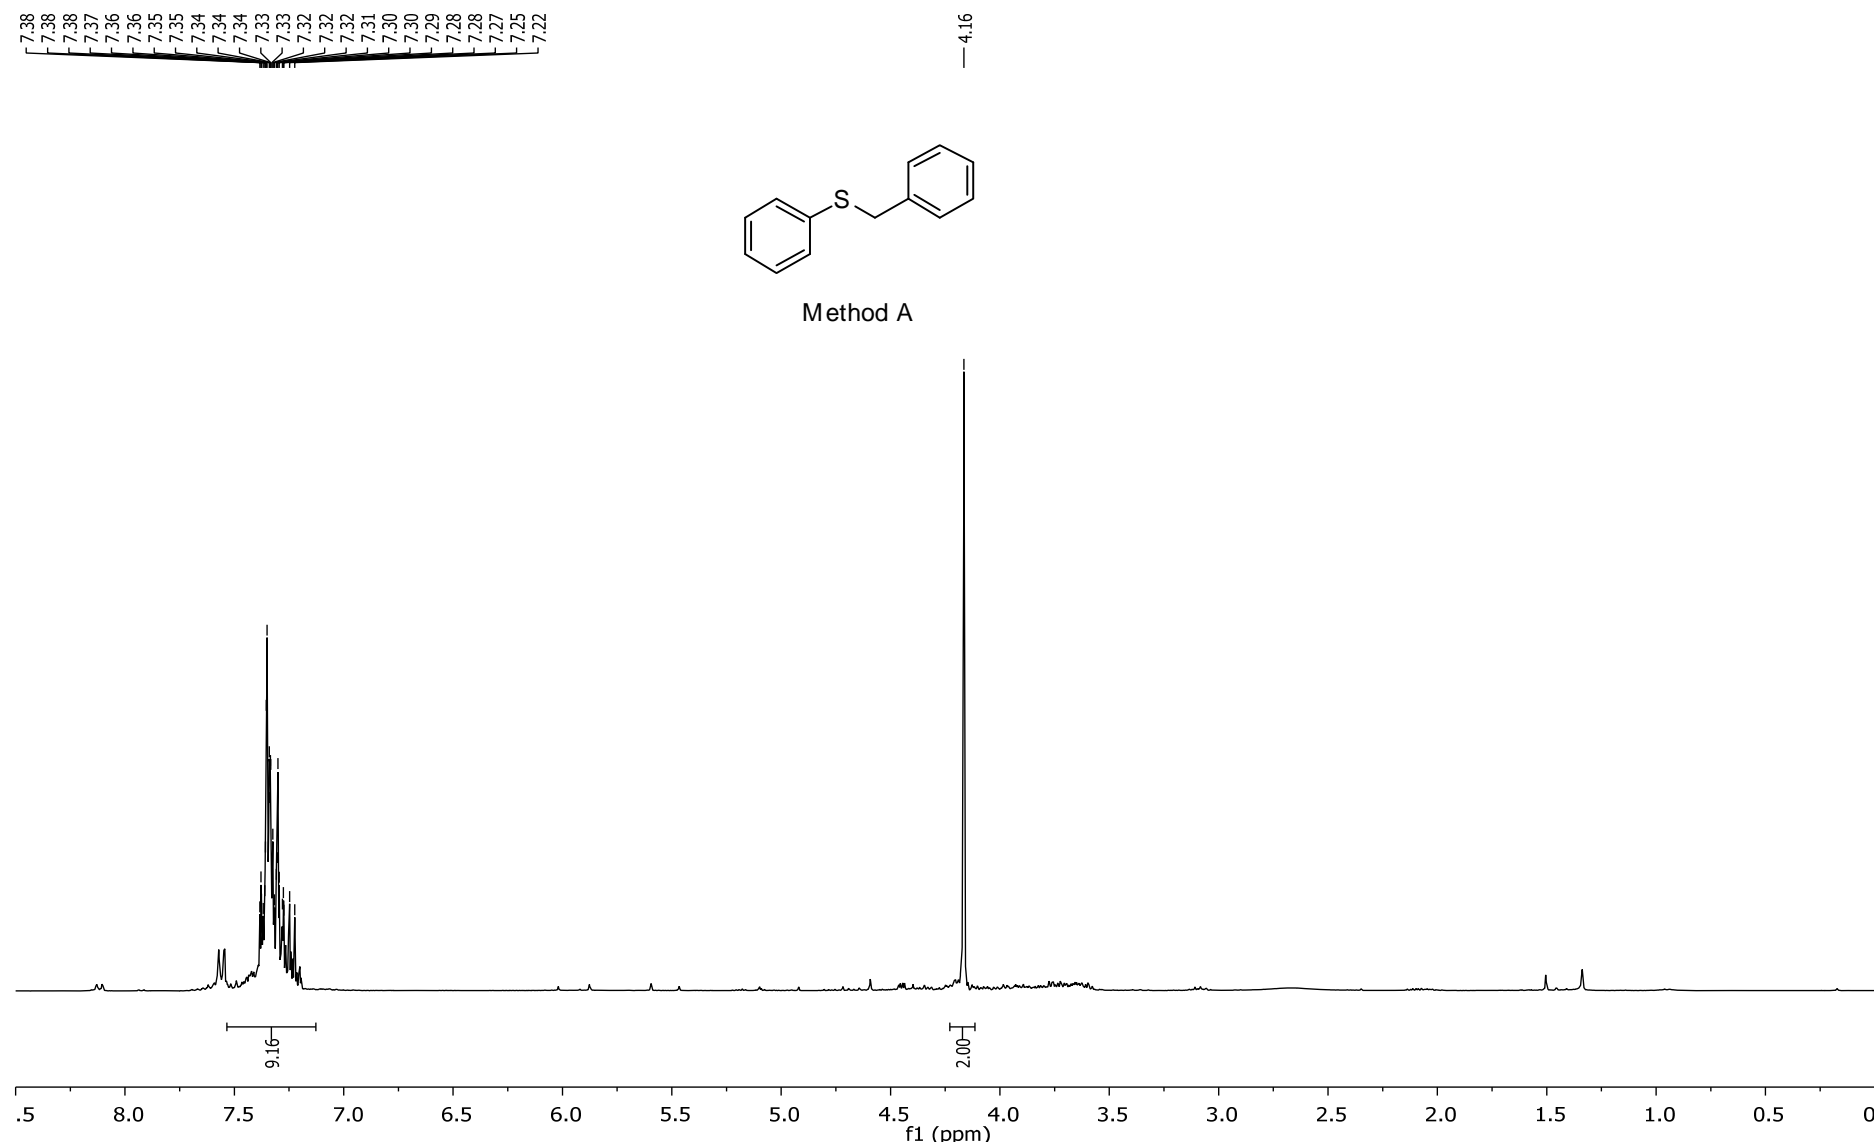

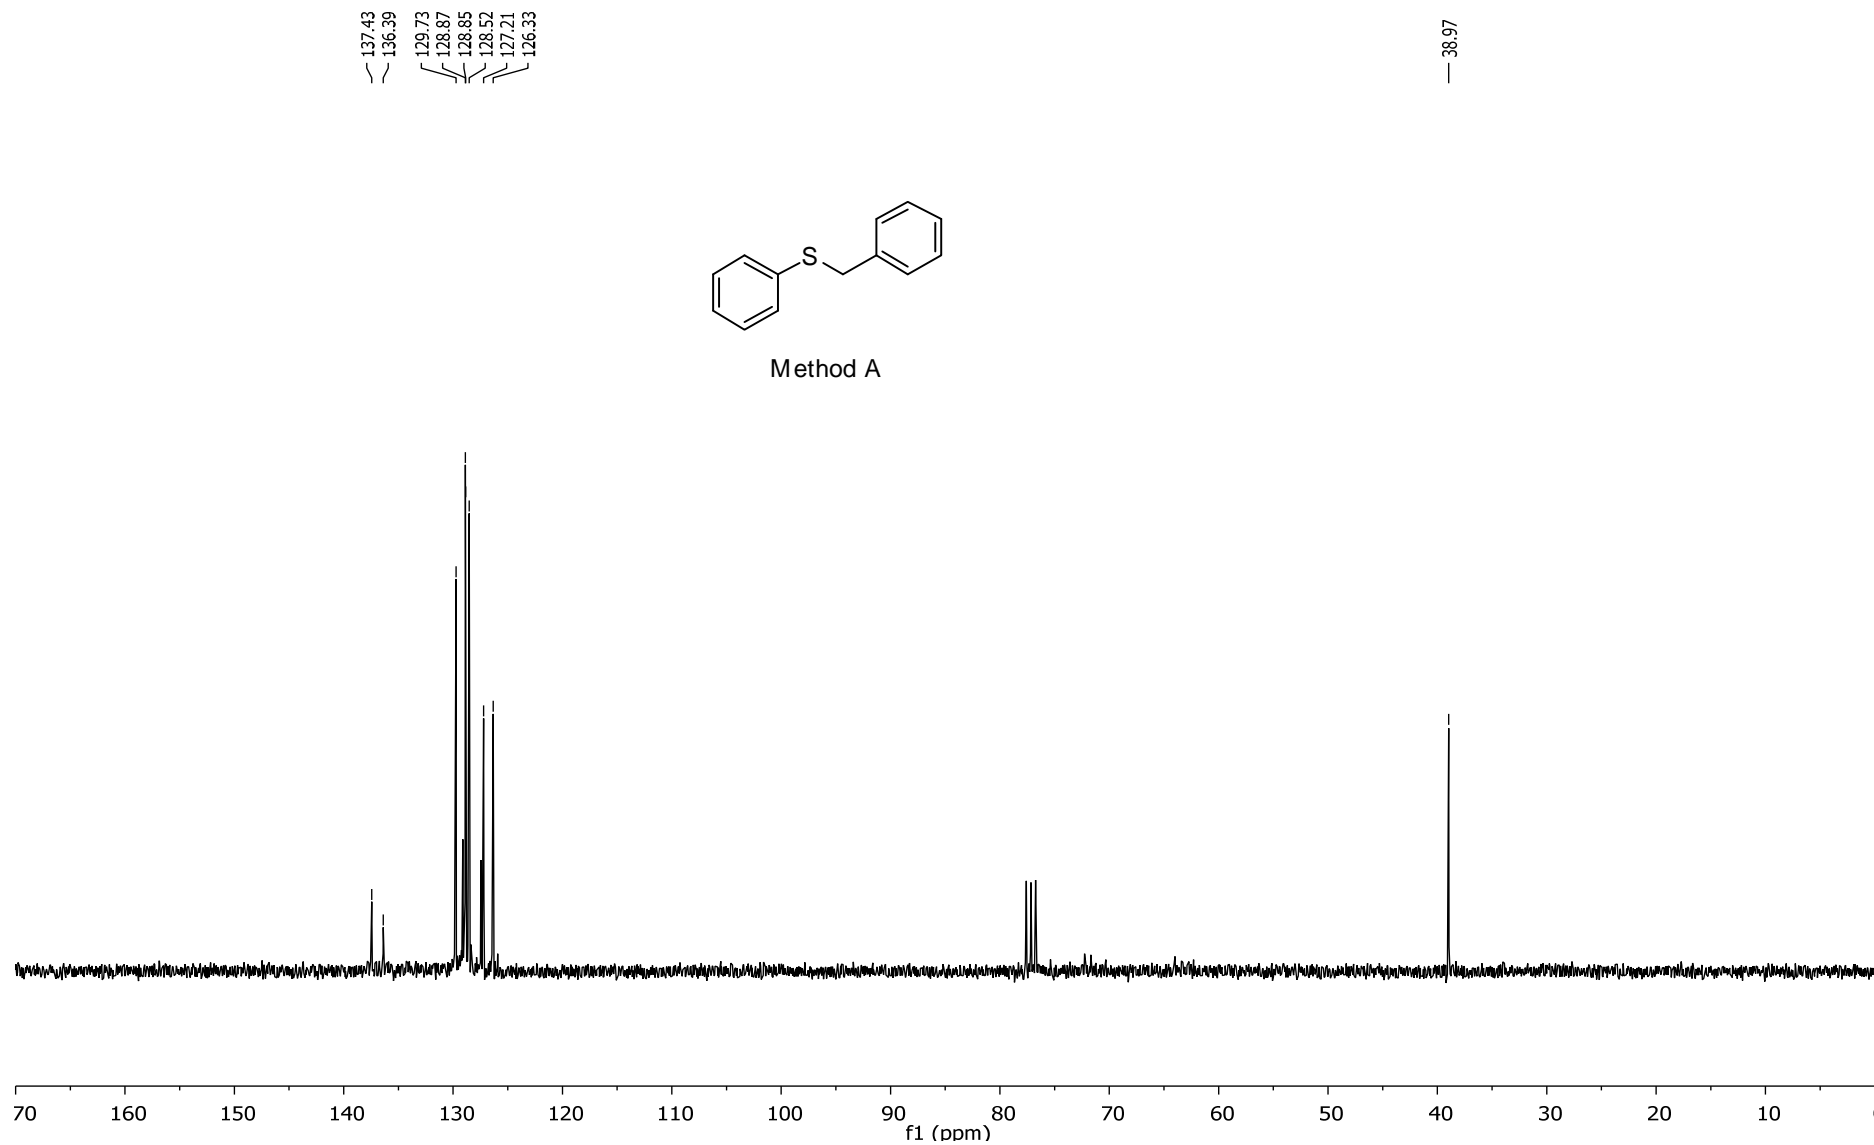

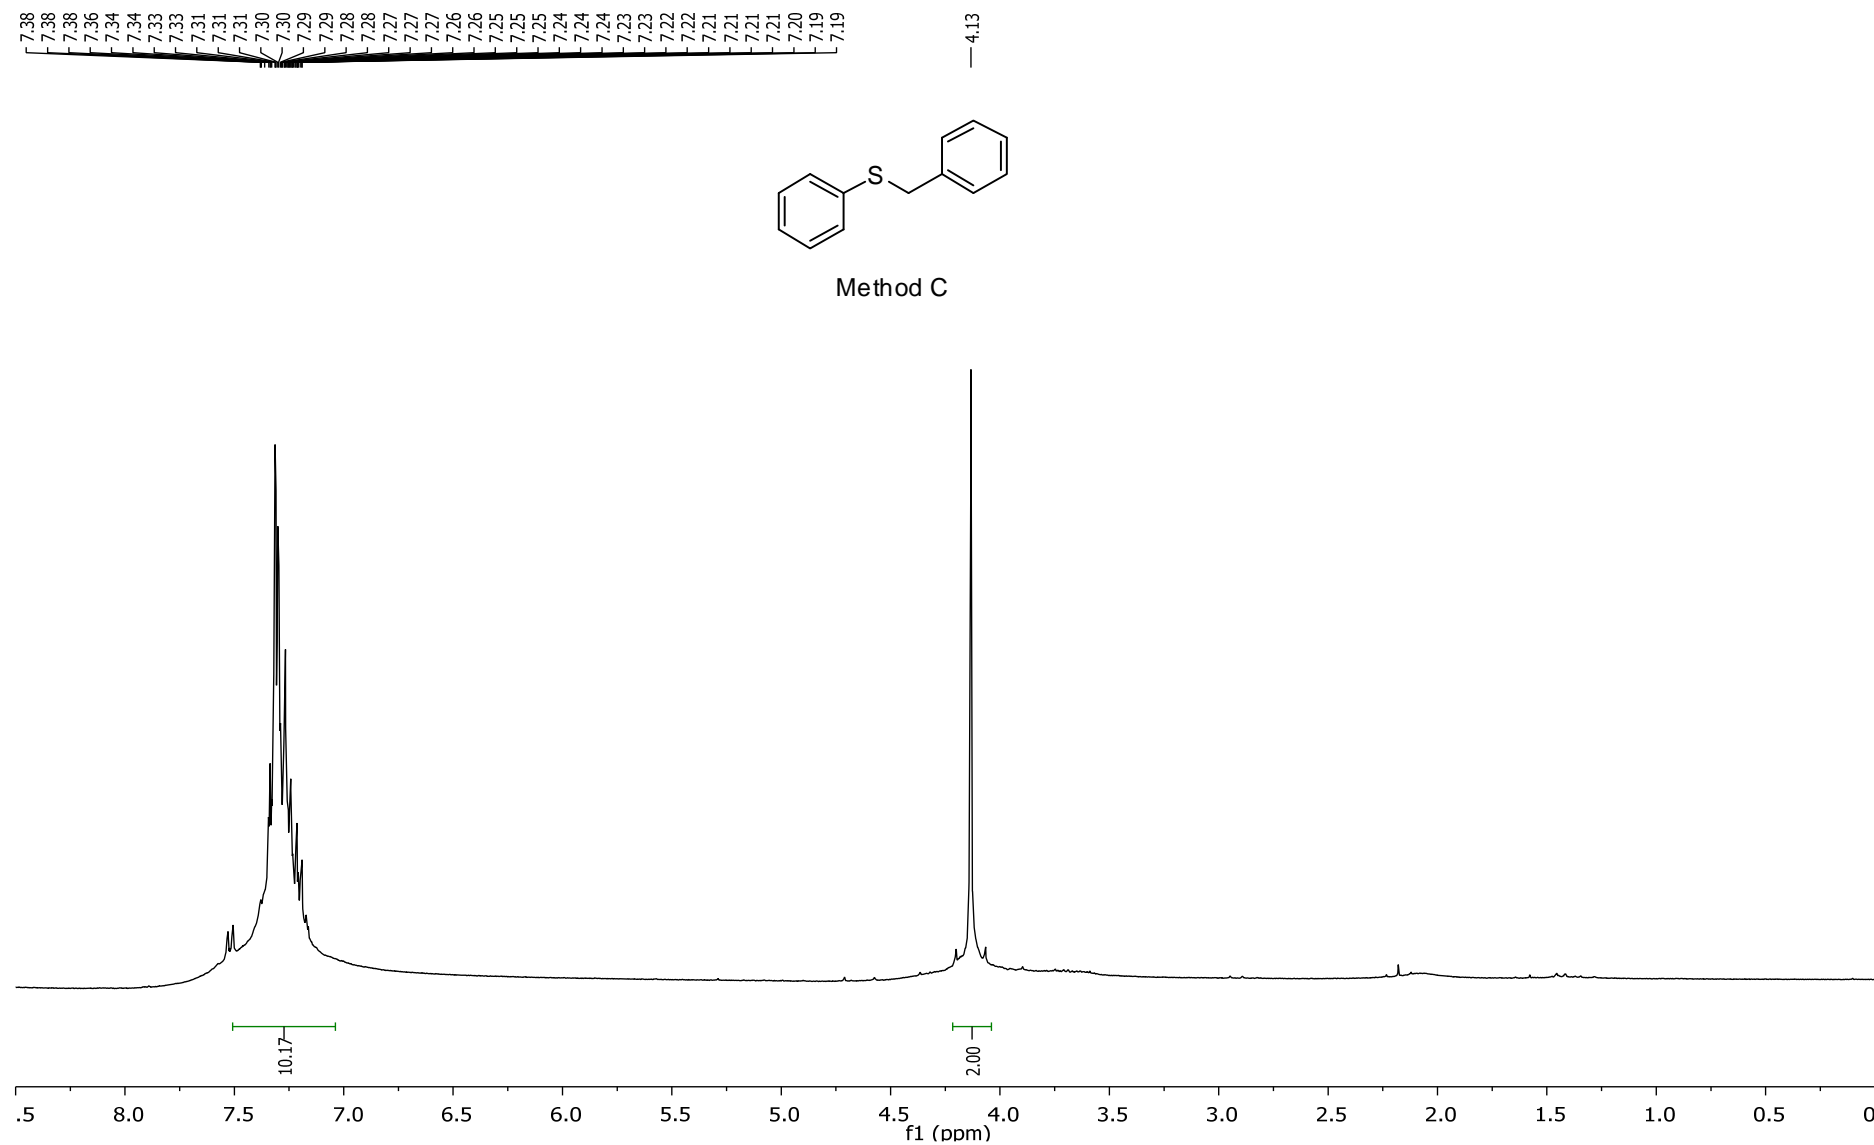

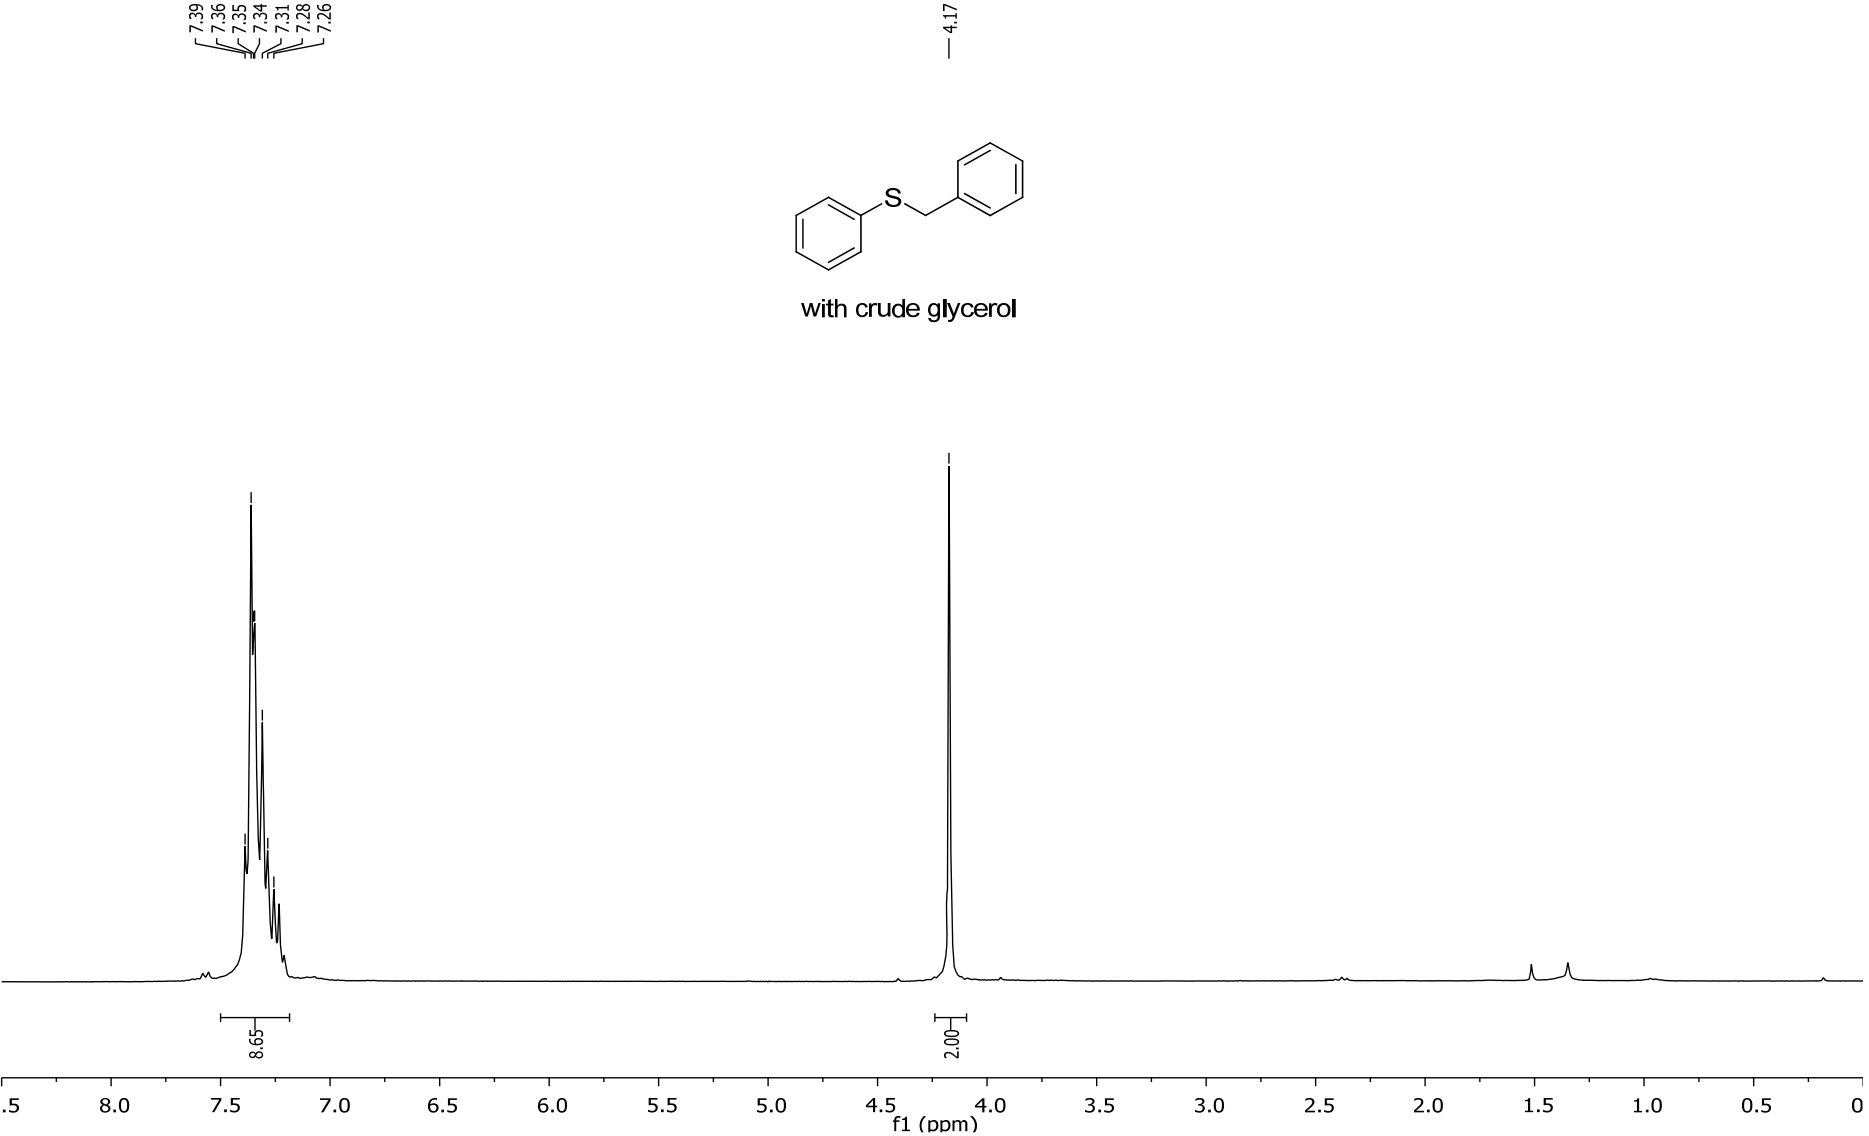

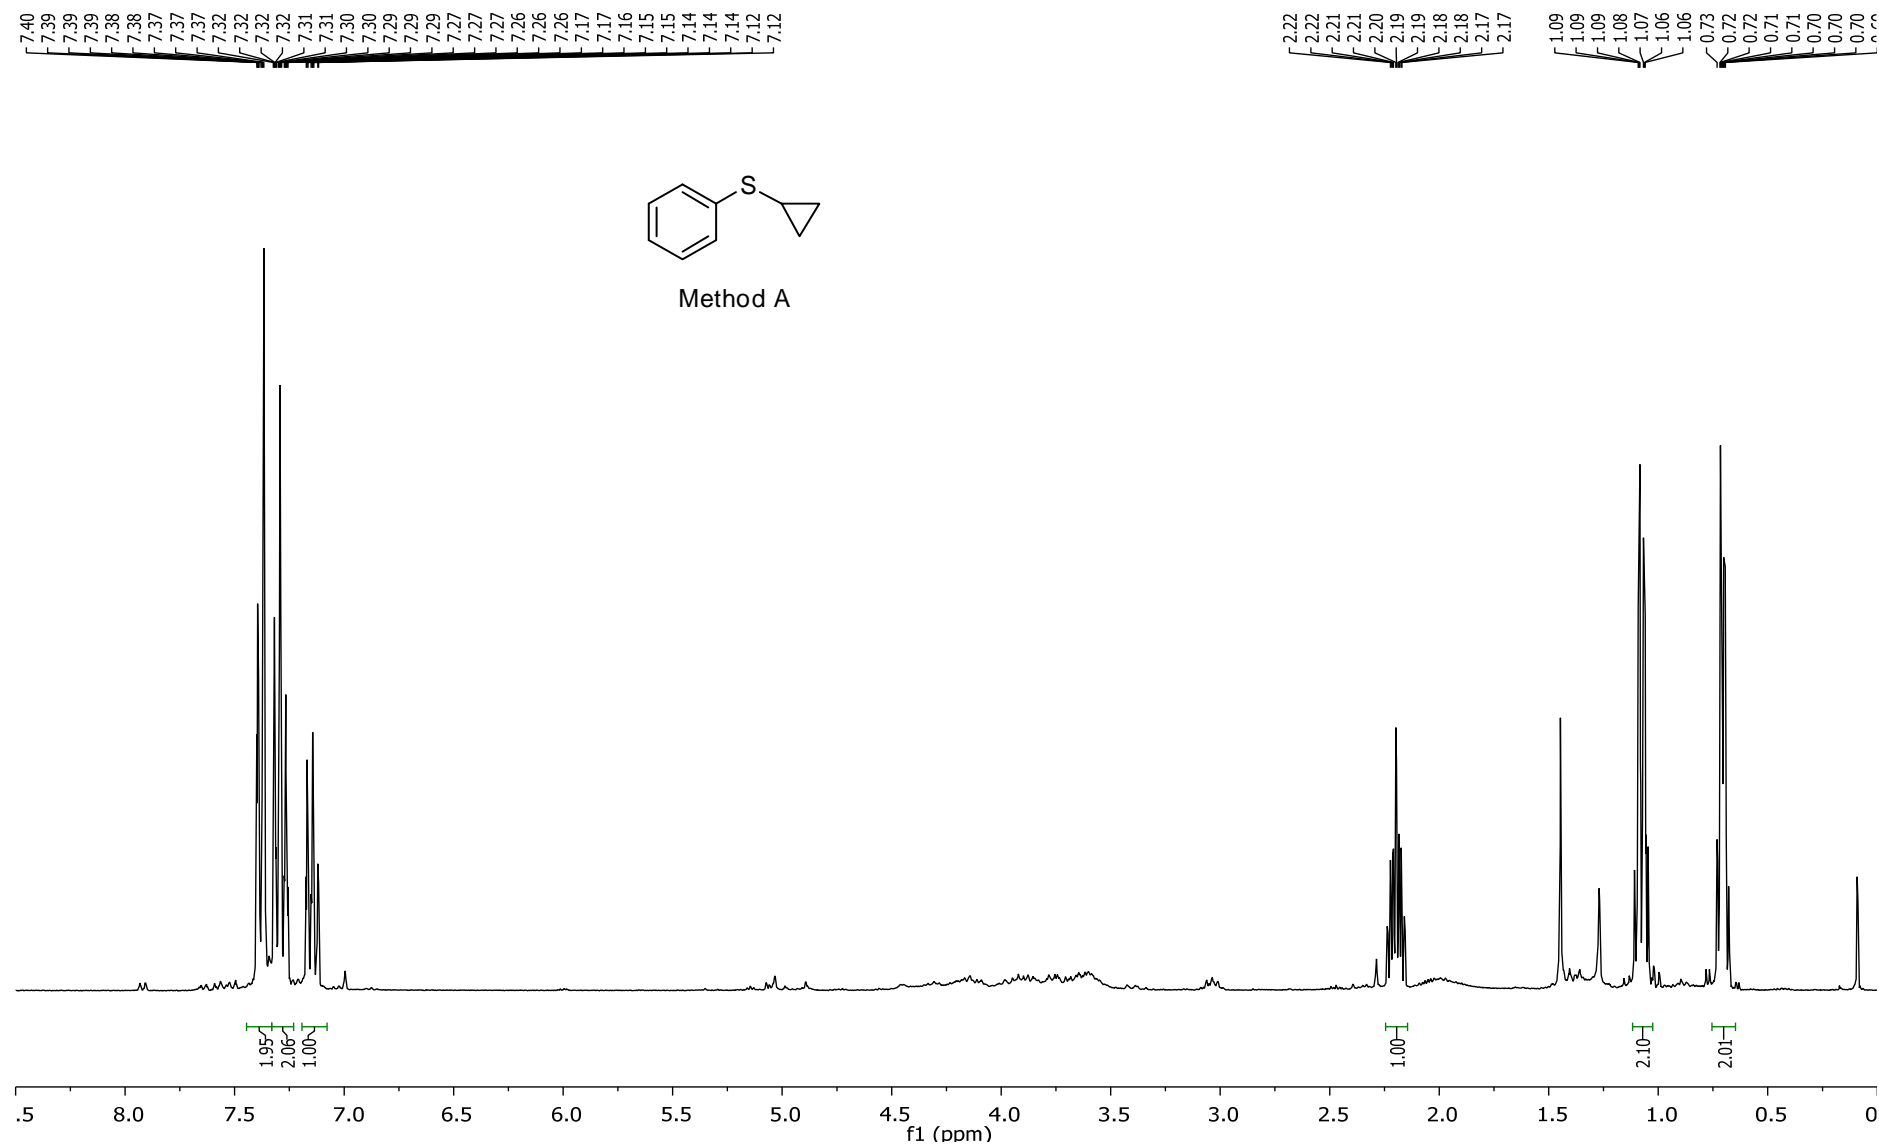



7.41  
7.41  
7.40  
7.39  
7.39  
7.38  
7.38  
7.37  
7.34  
7.33  
7.32  
7.32  
7.32  
7.31  
7.31  
7.30  
7.29  
7.28  
7.27  
7.26  
7.19  
7.18  
7.18  
7.17  
7.16  
7.16  
7.15  
7.14  
7.13

2.25  
2.23  
2.22  
2.22  
2.21  
2.20  
2.19  
2.18  
2.17  
  
1.12  
1.10  
1.10  
1.09  
1.08  
1.07  
1.07  
1.06  
0.74  
0.73  
0.72  
0.72  
0.71  
0.69

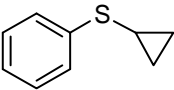

Method B

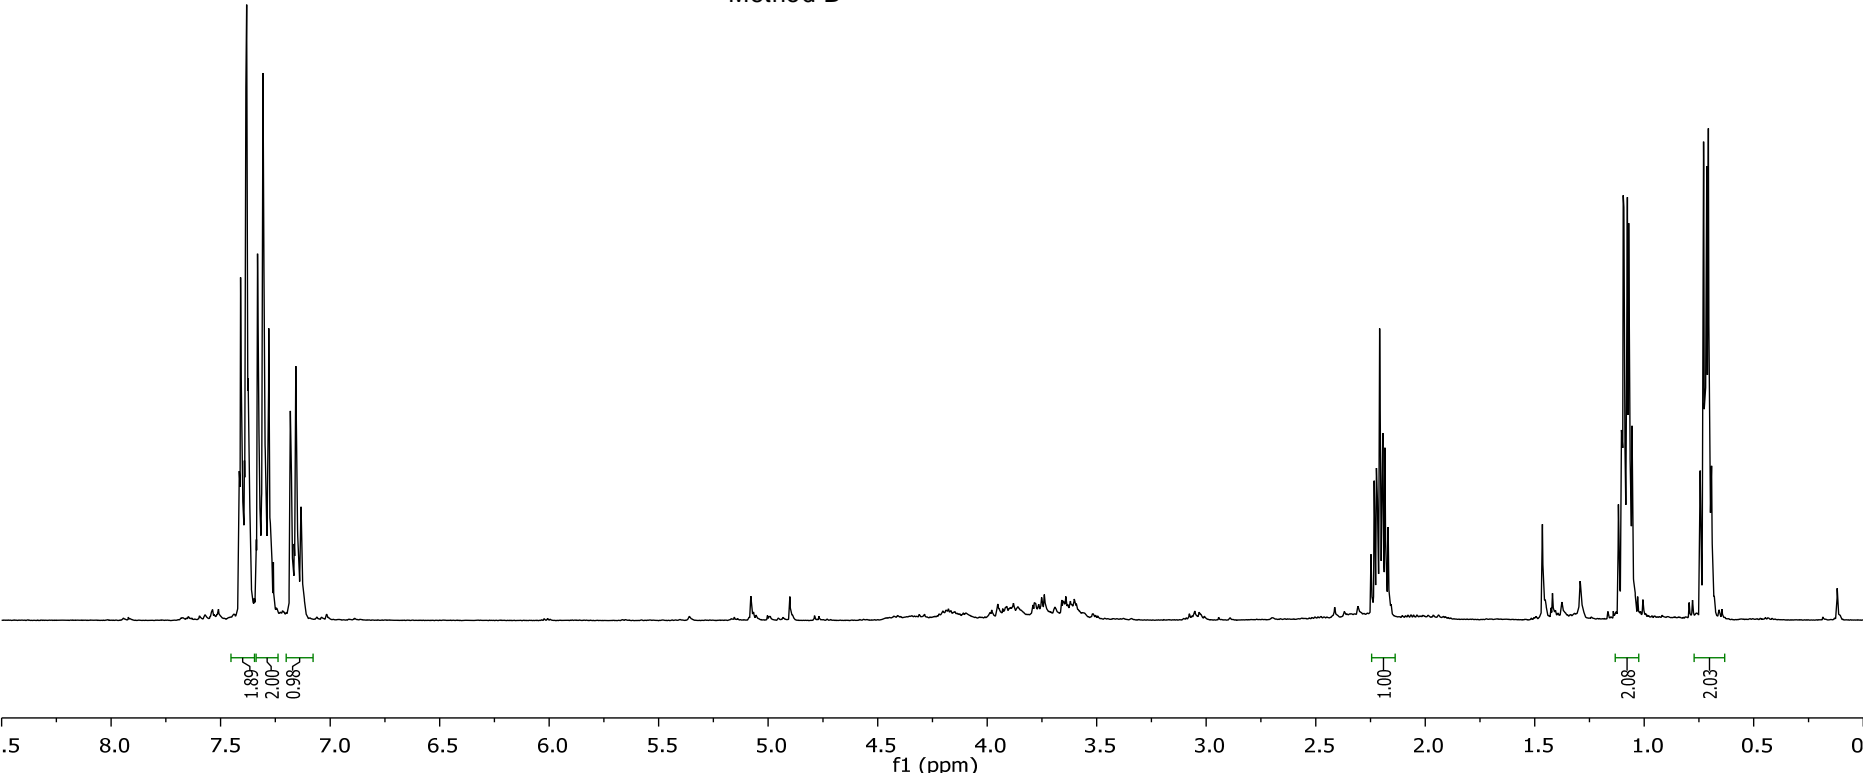

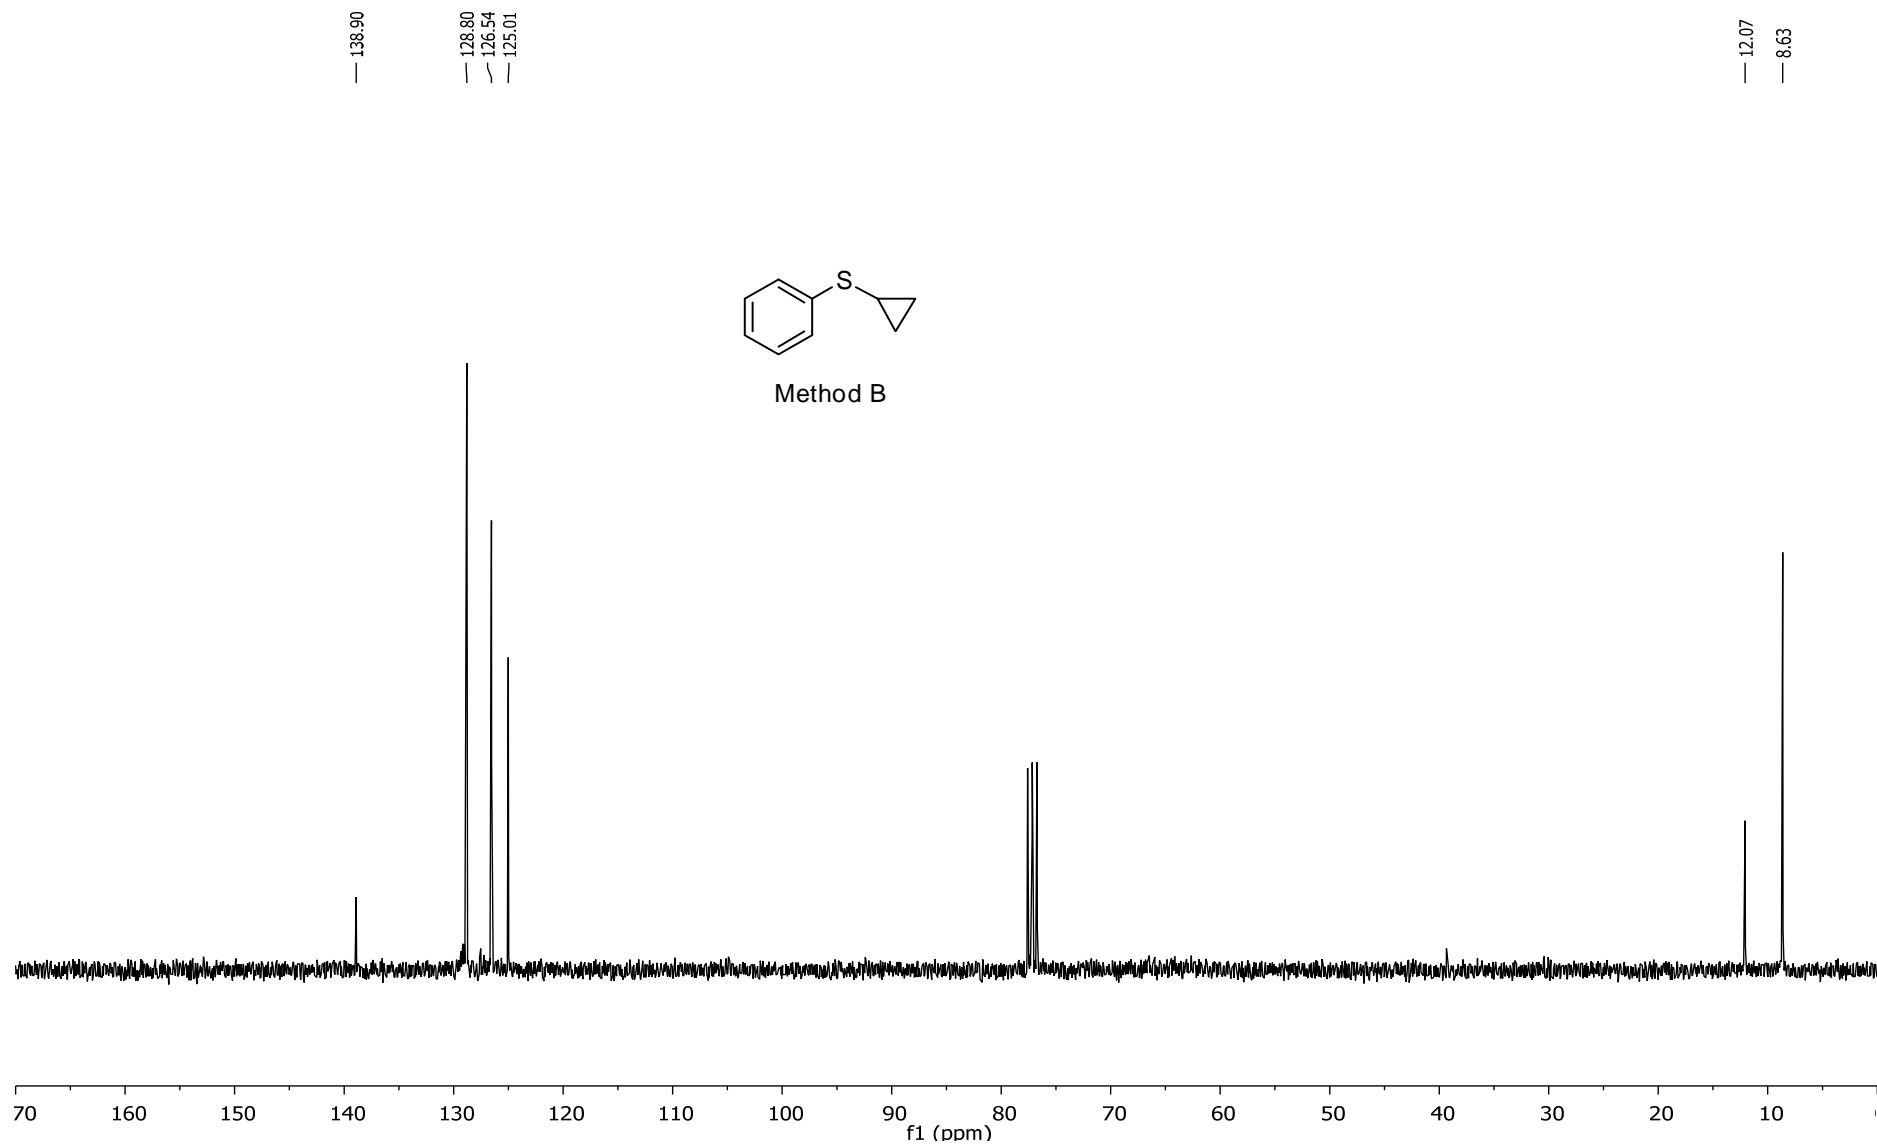

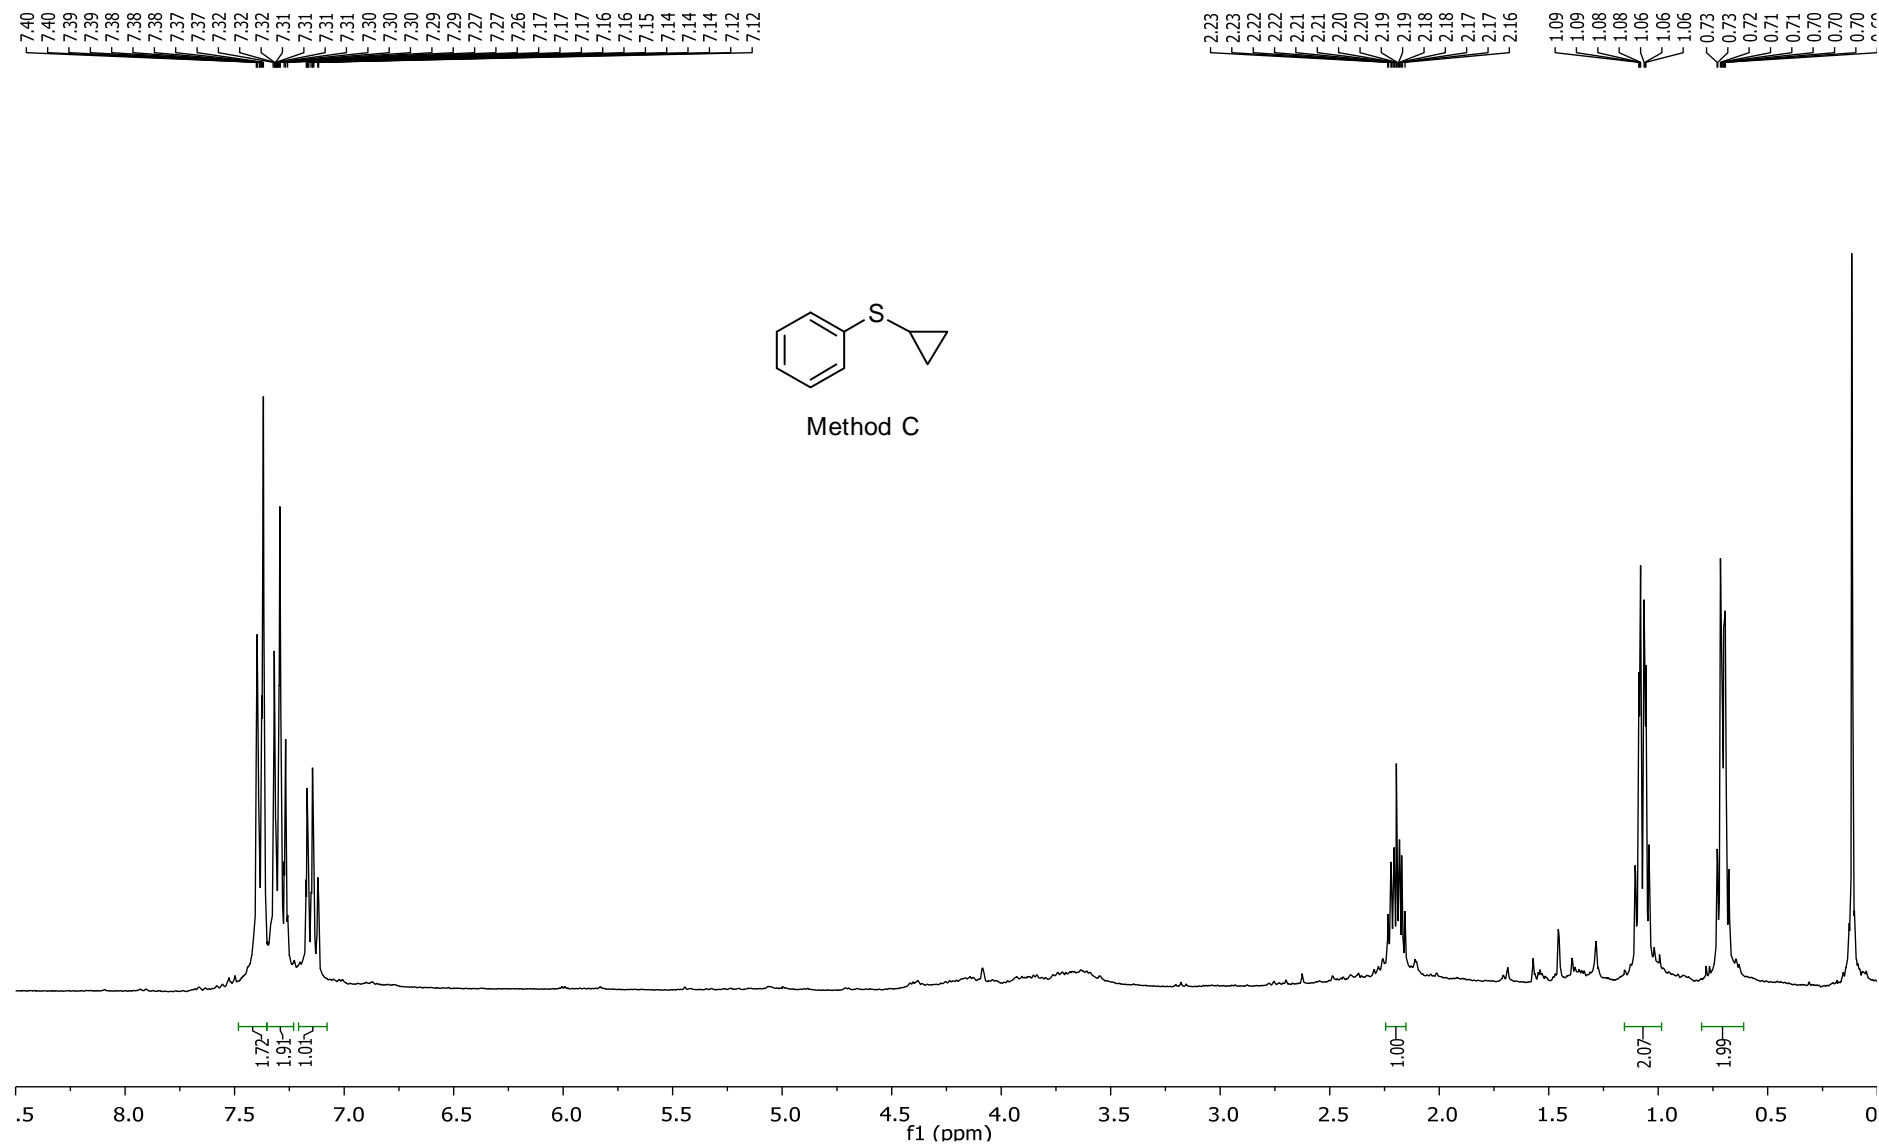

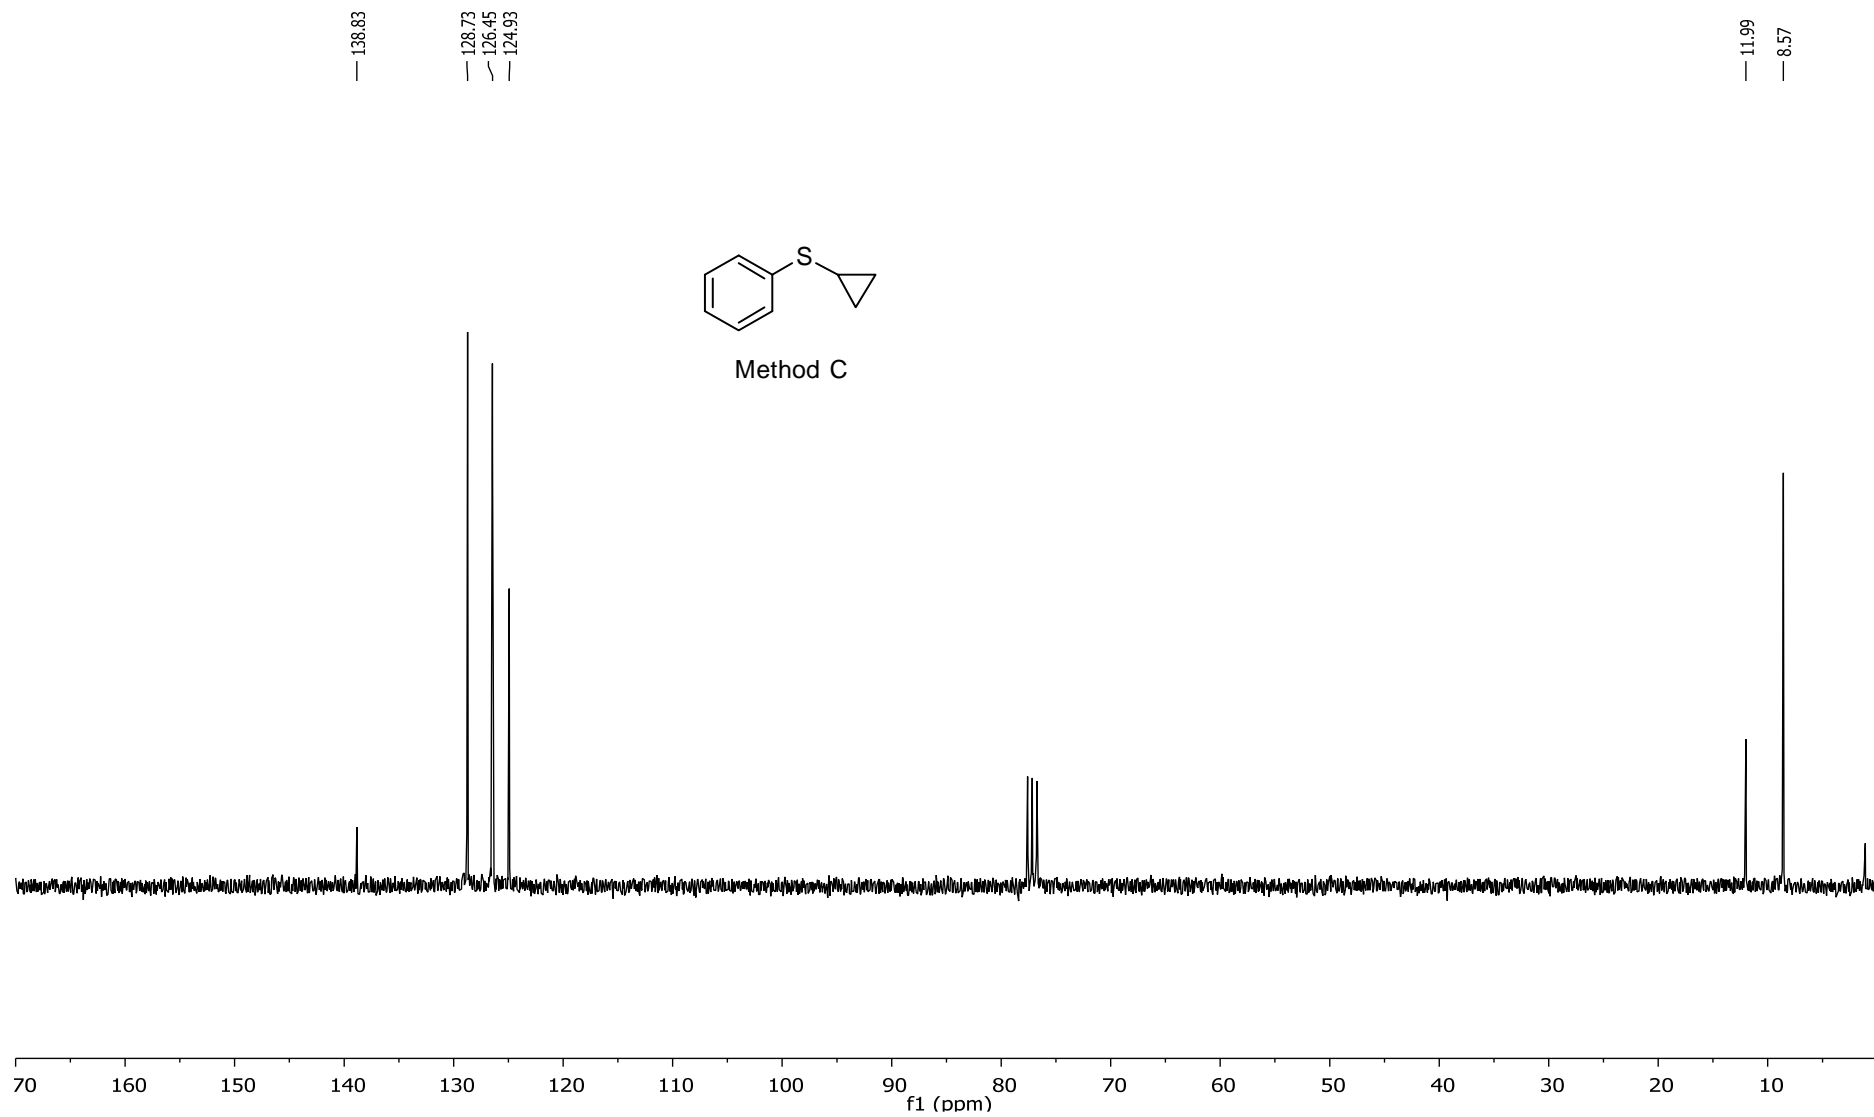

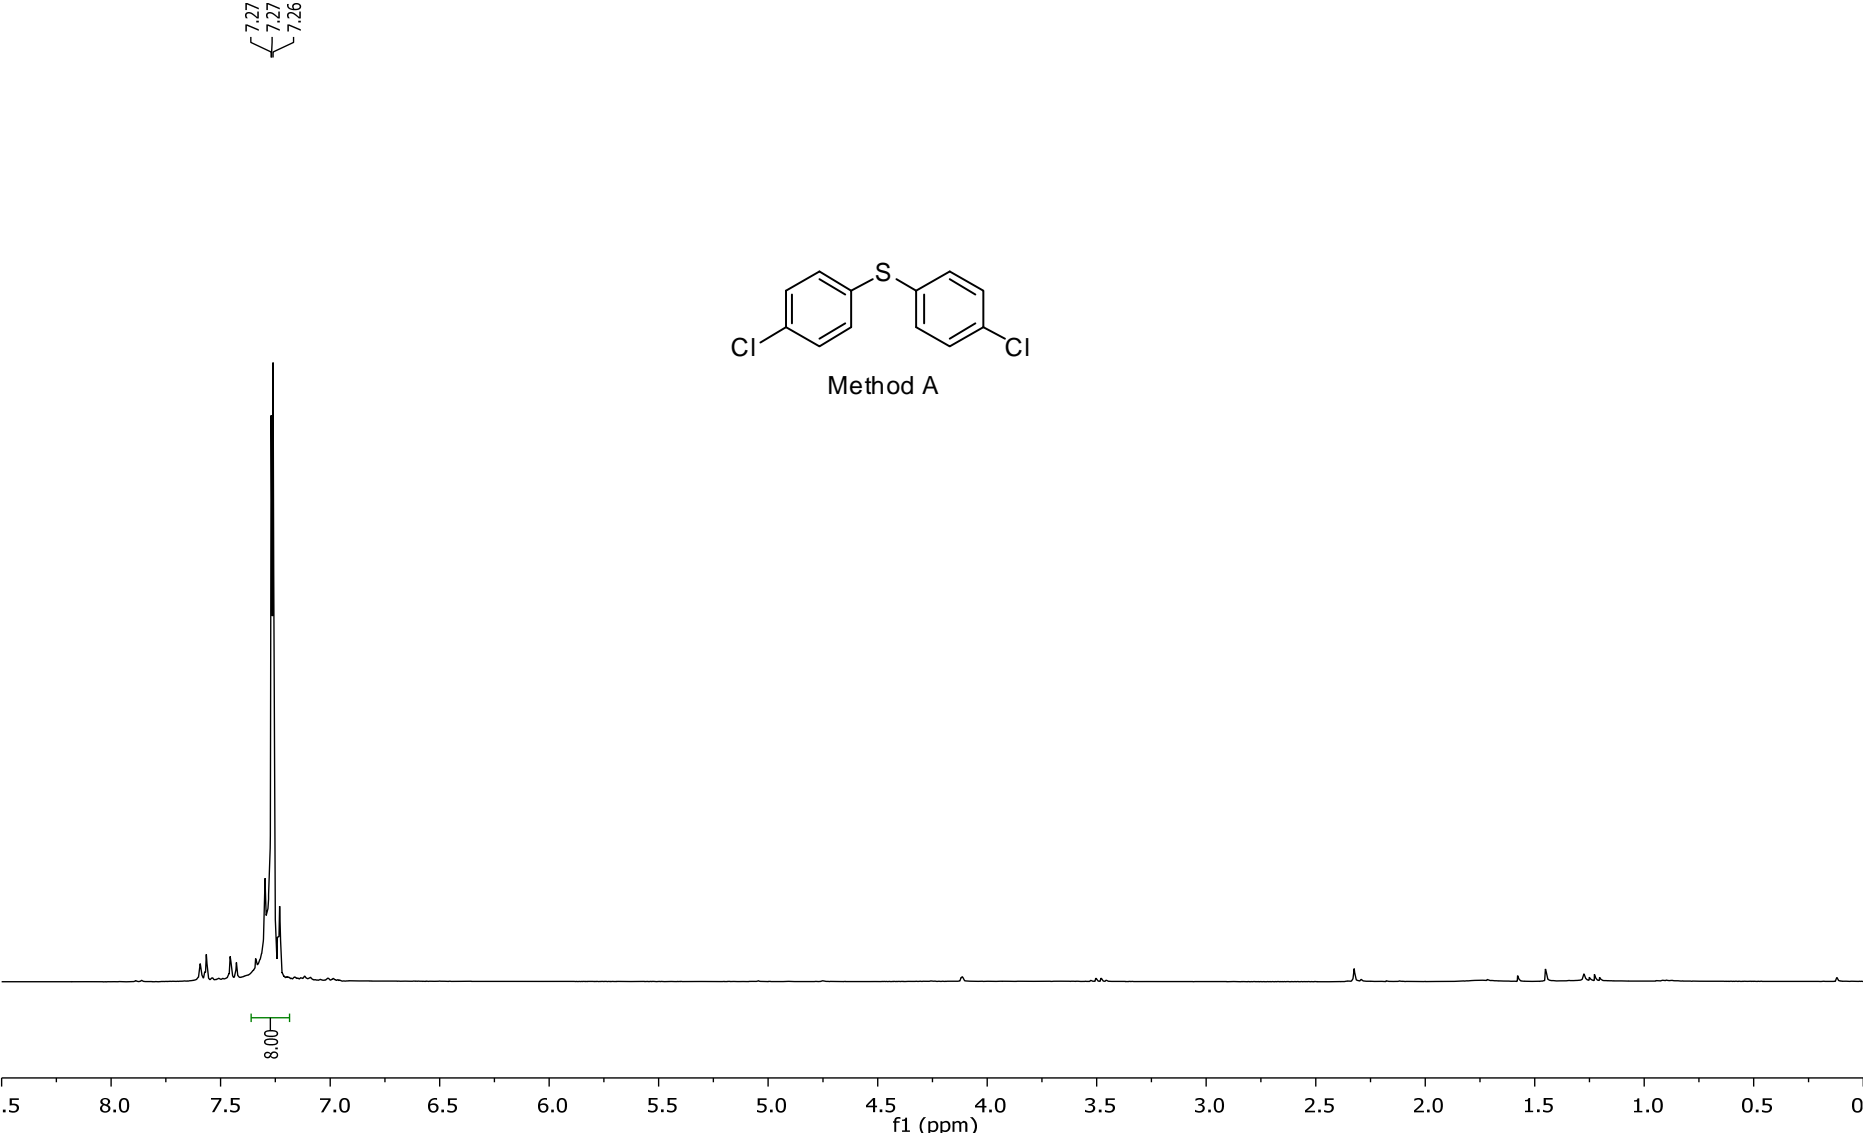

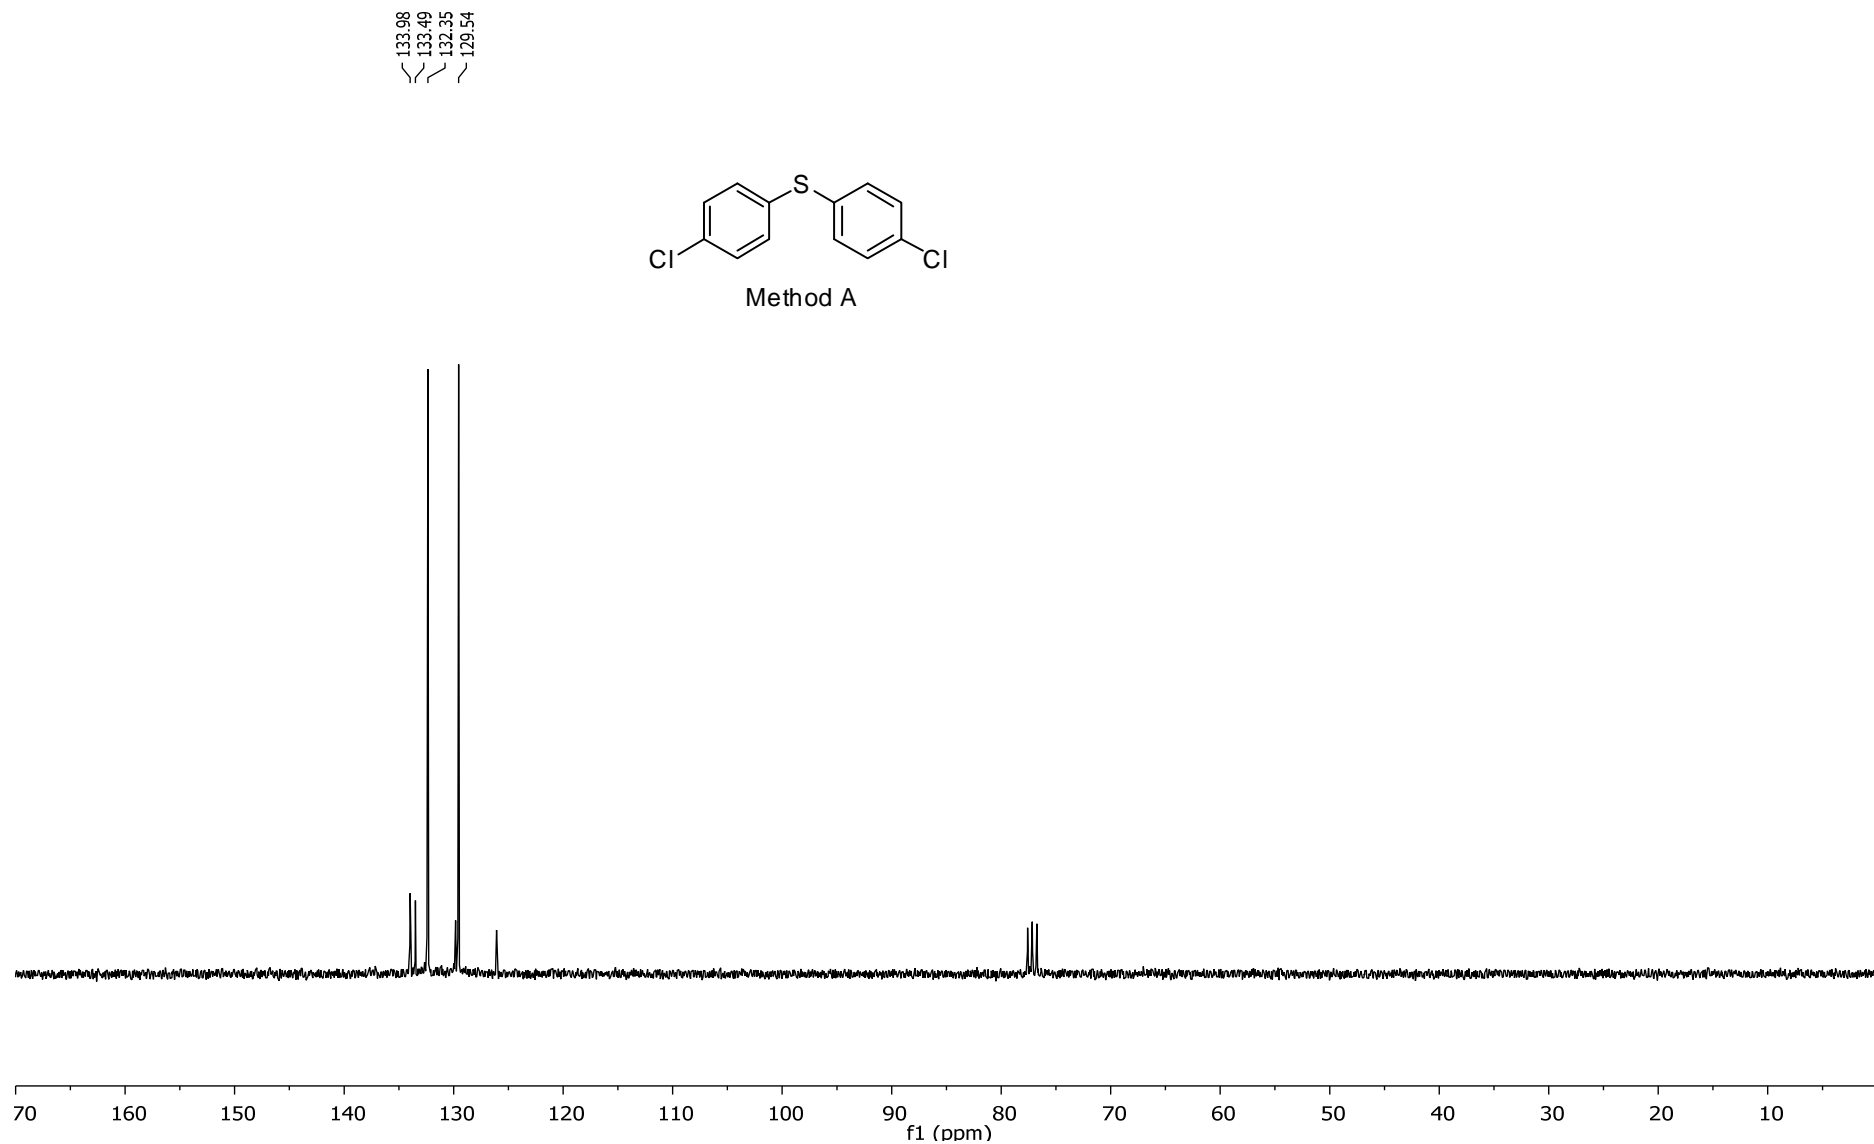

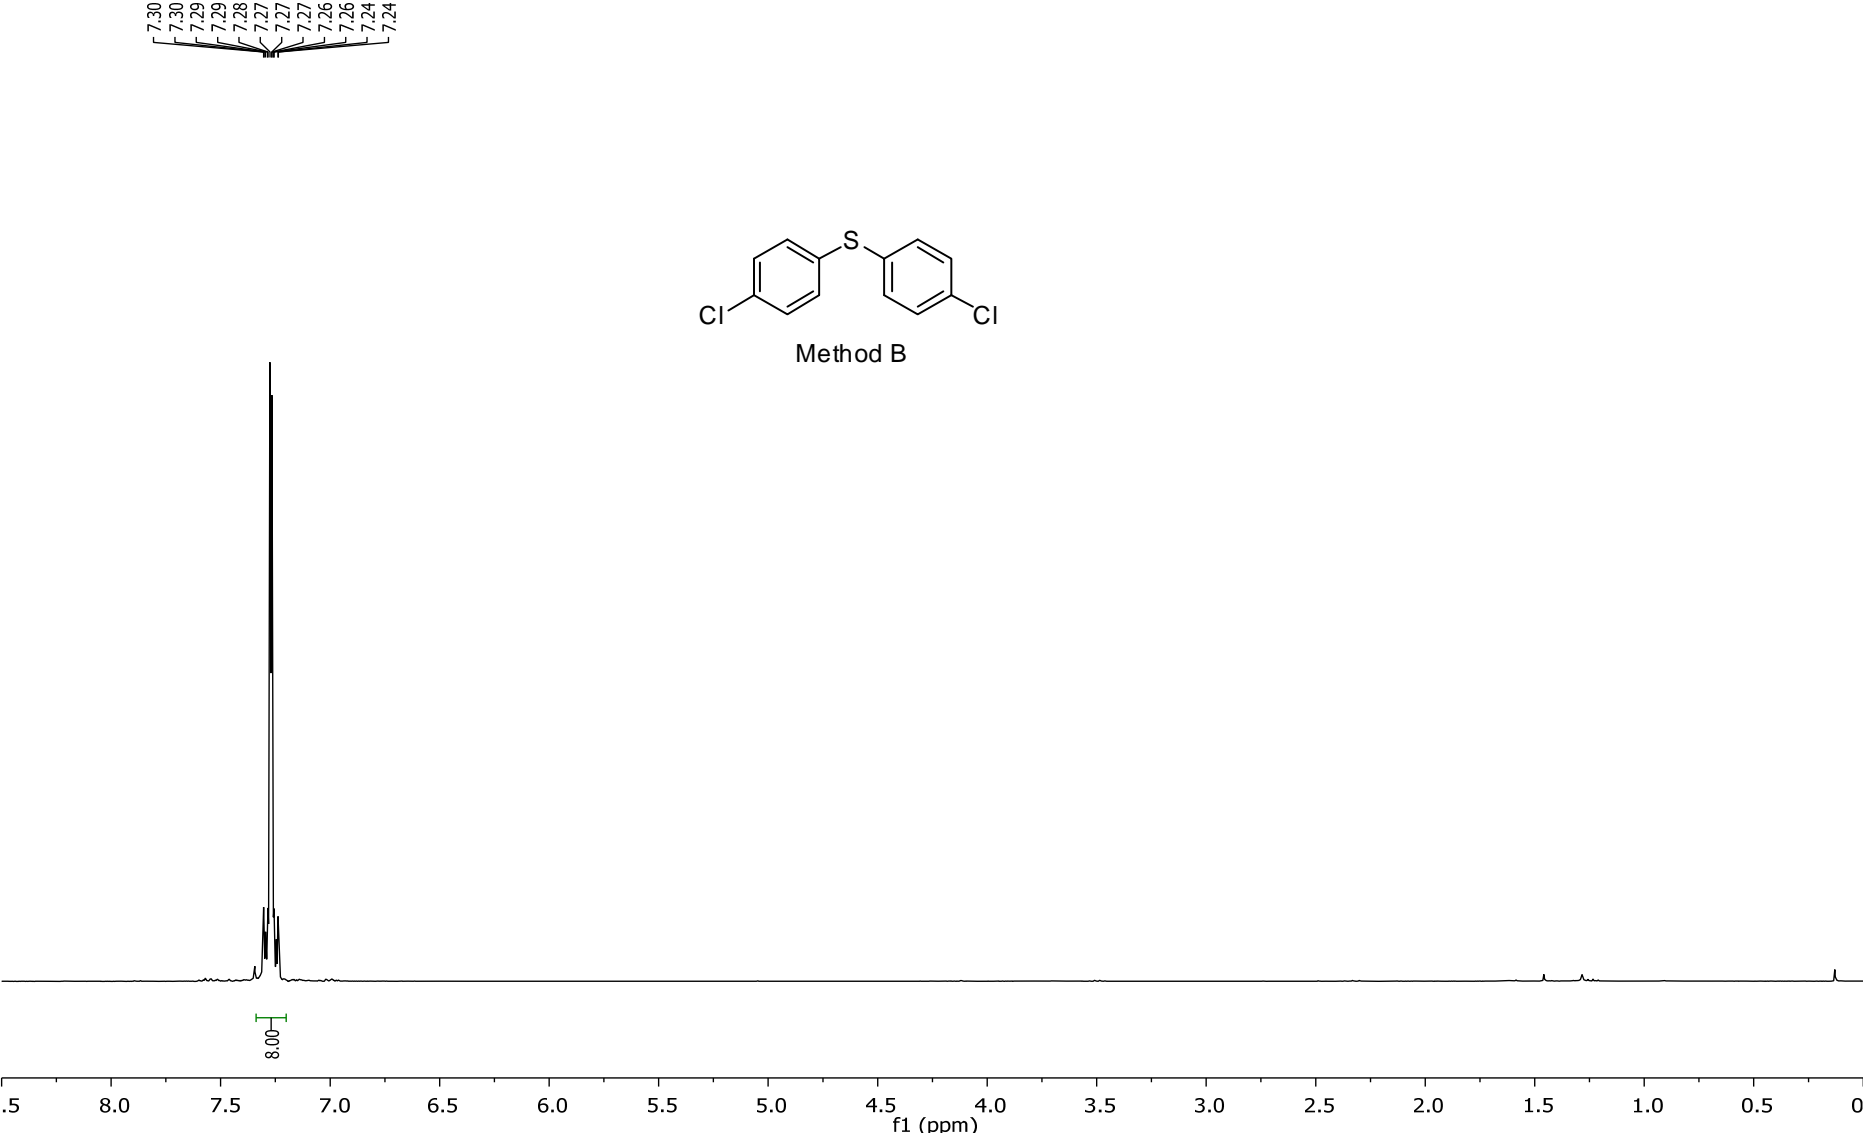

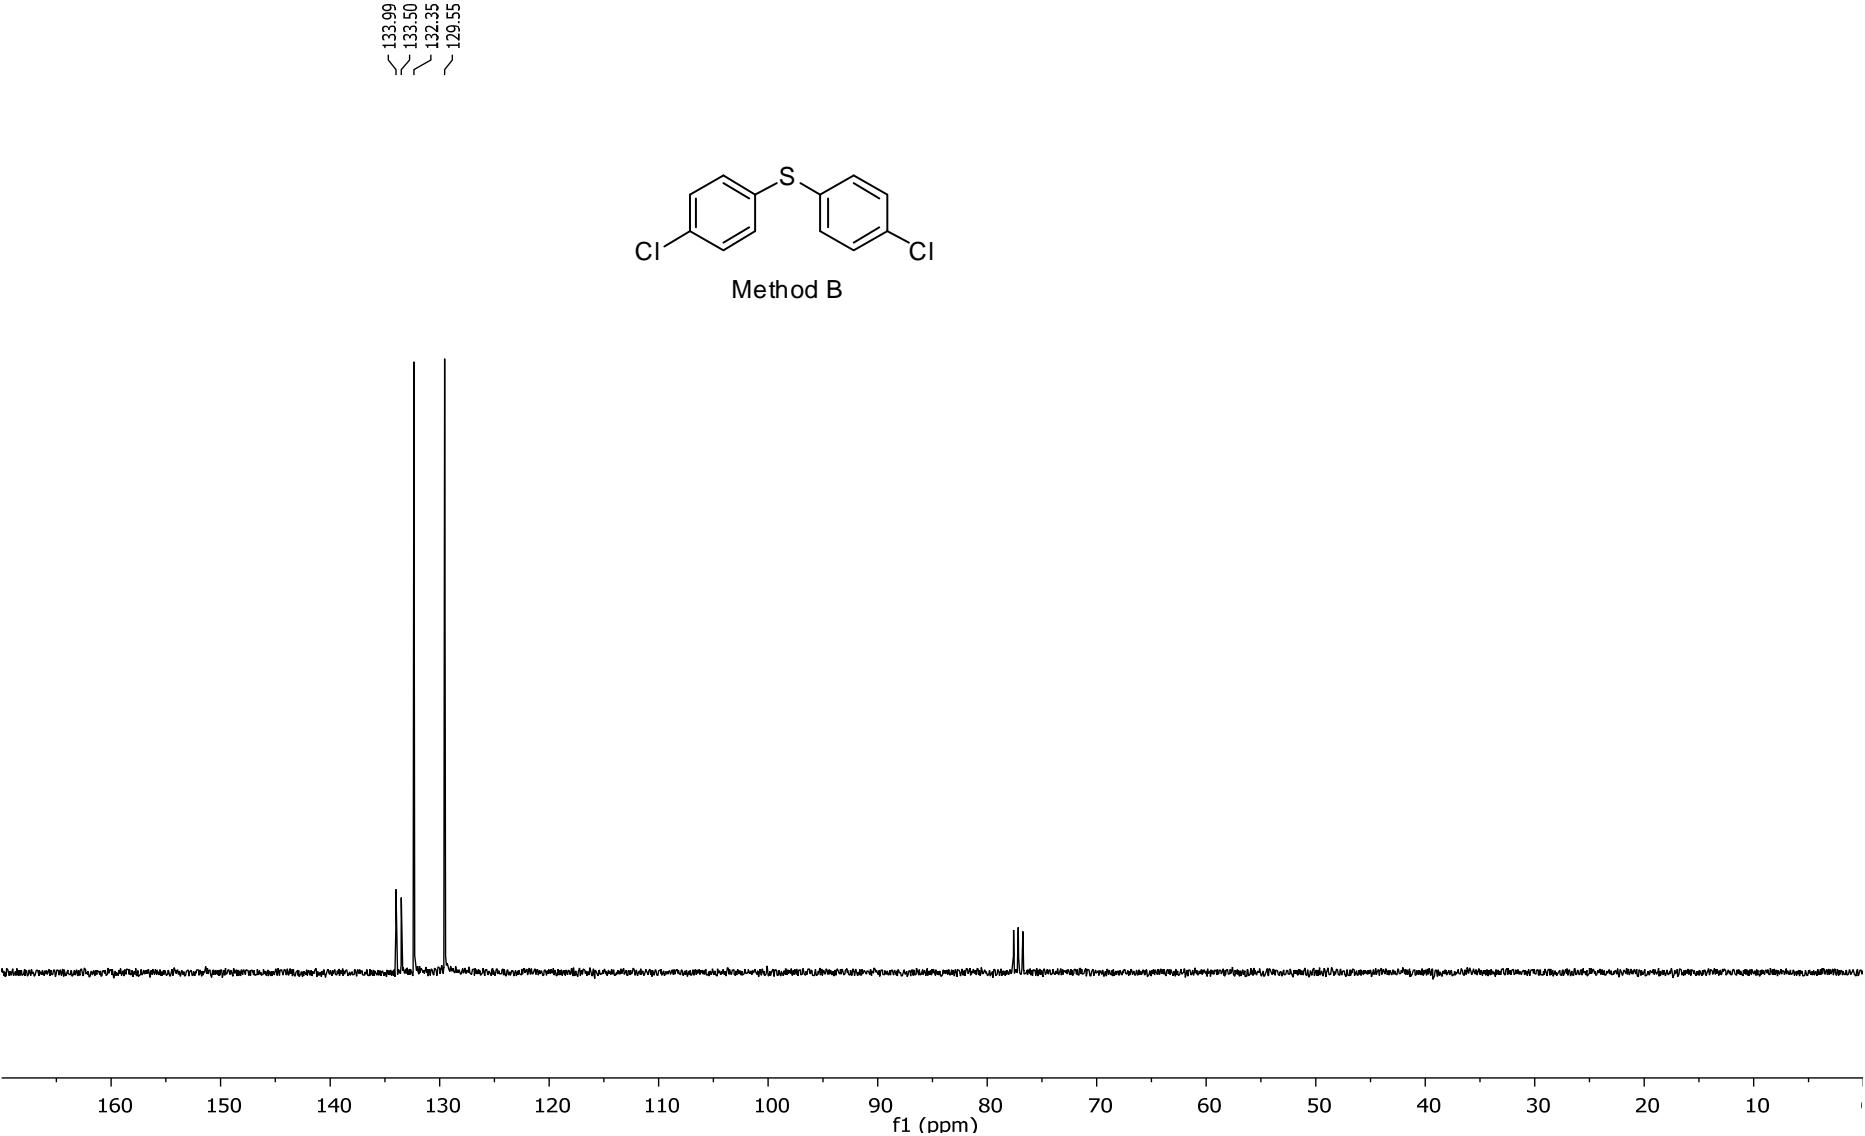



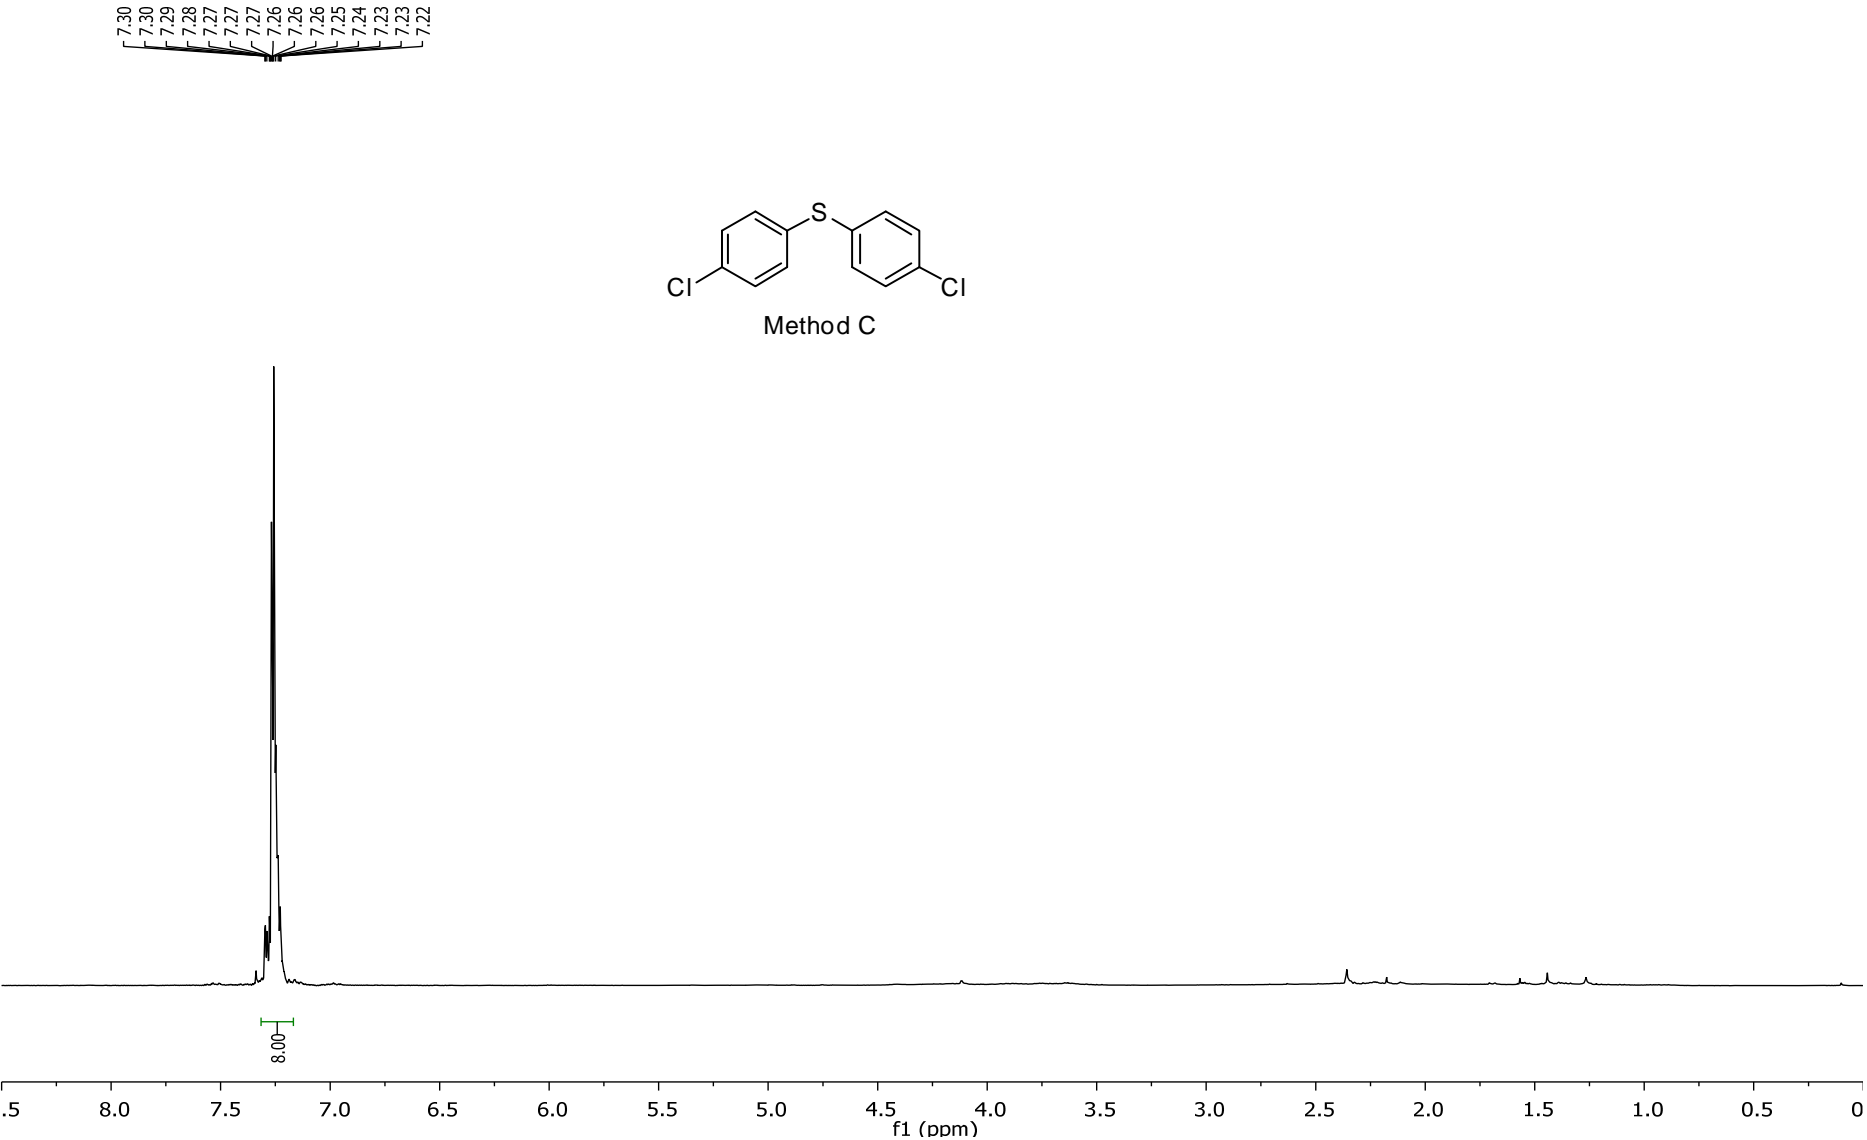

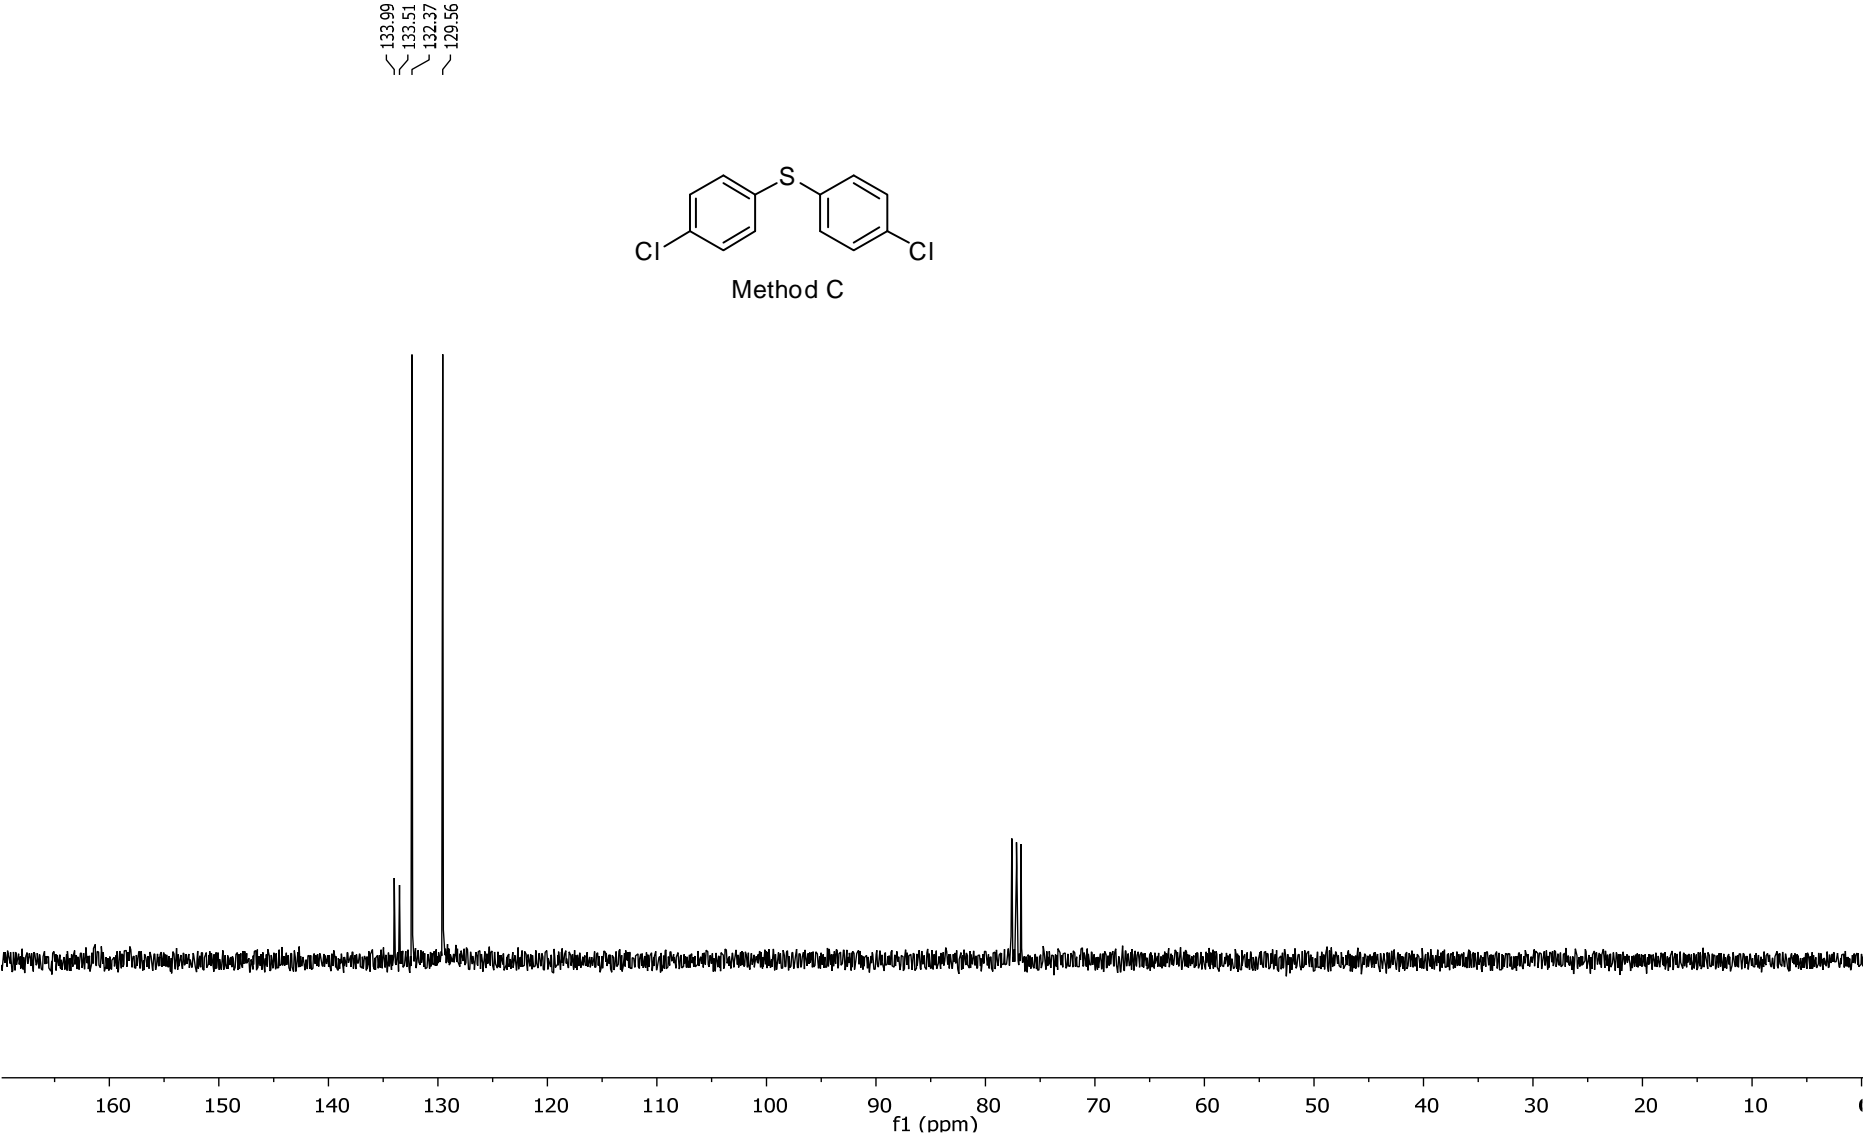

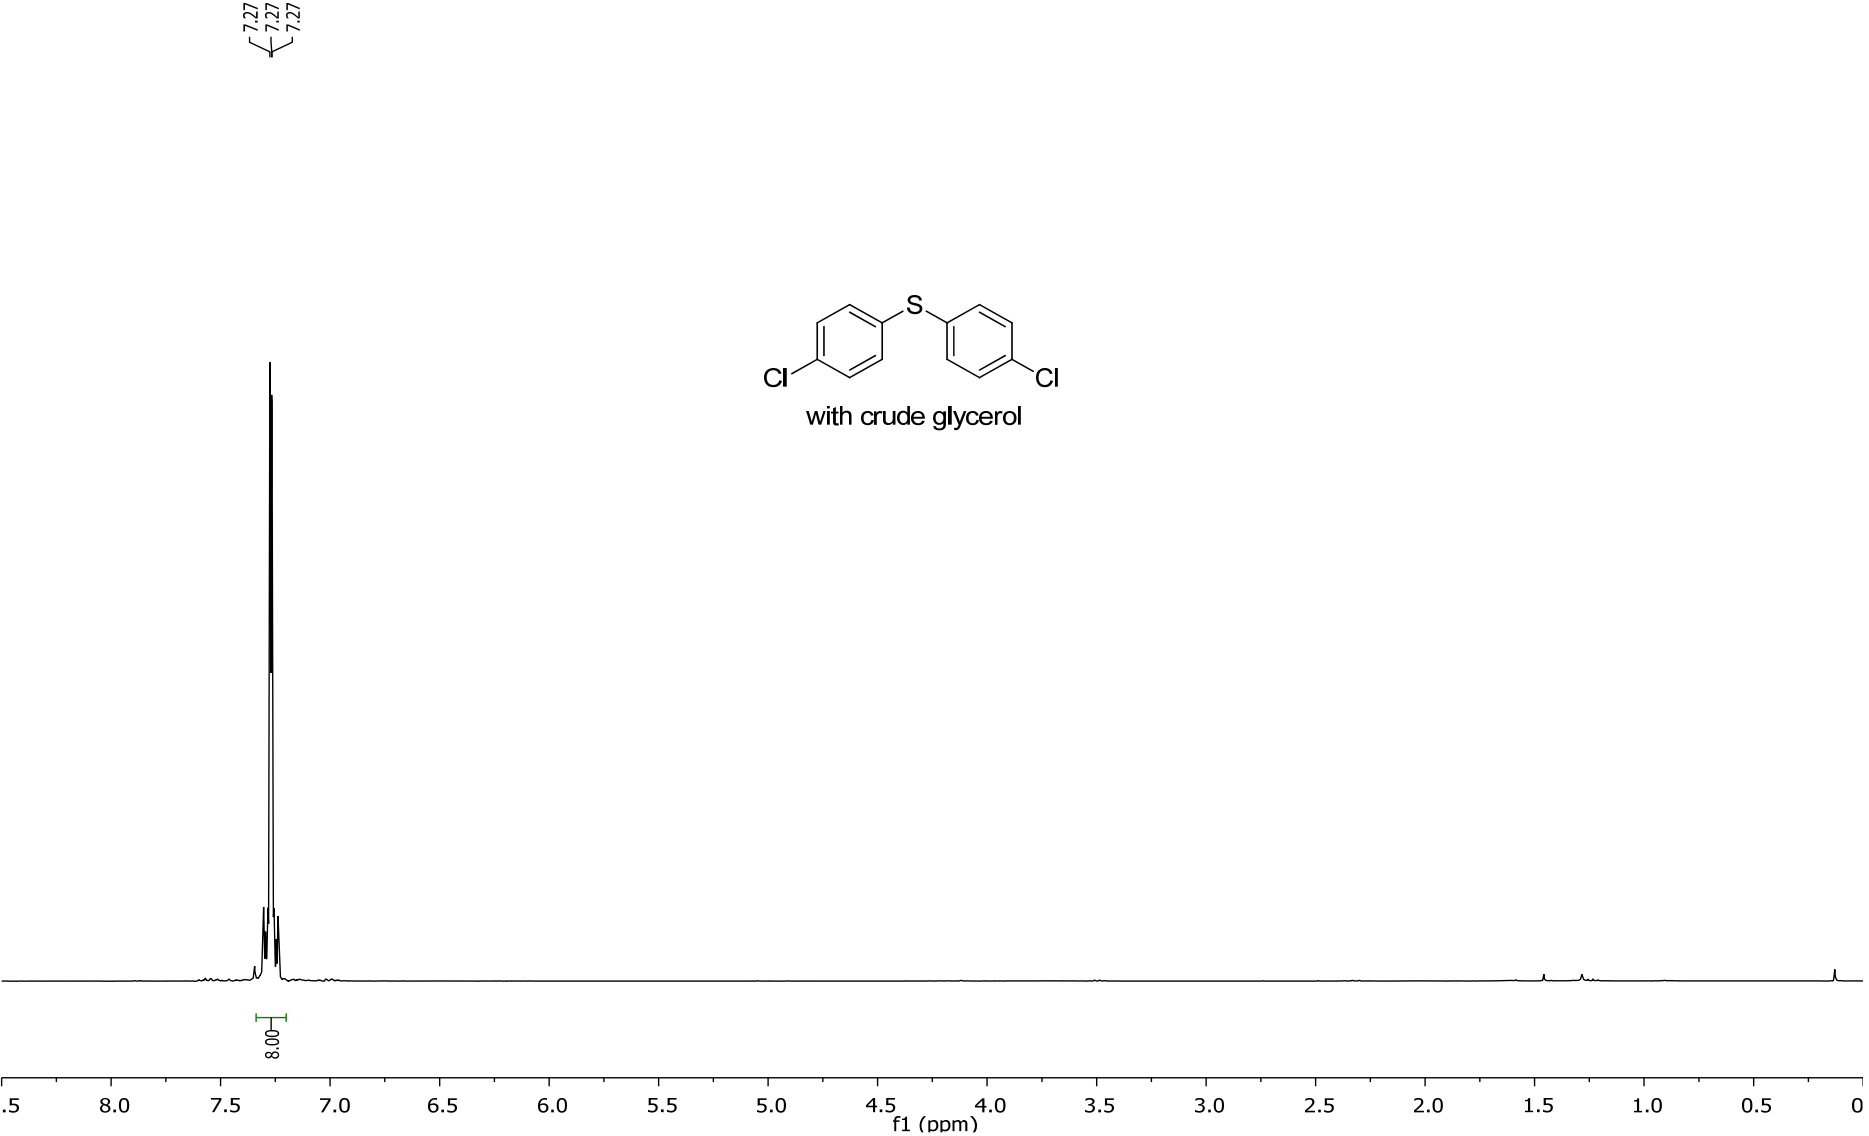

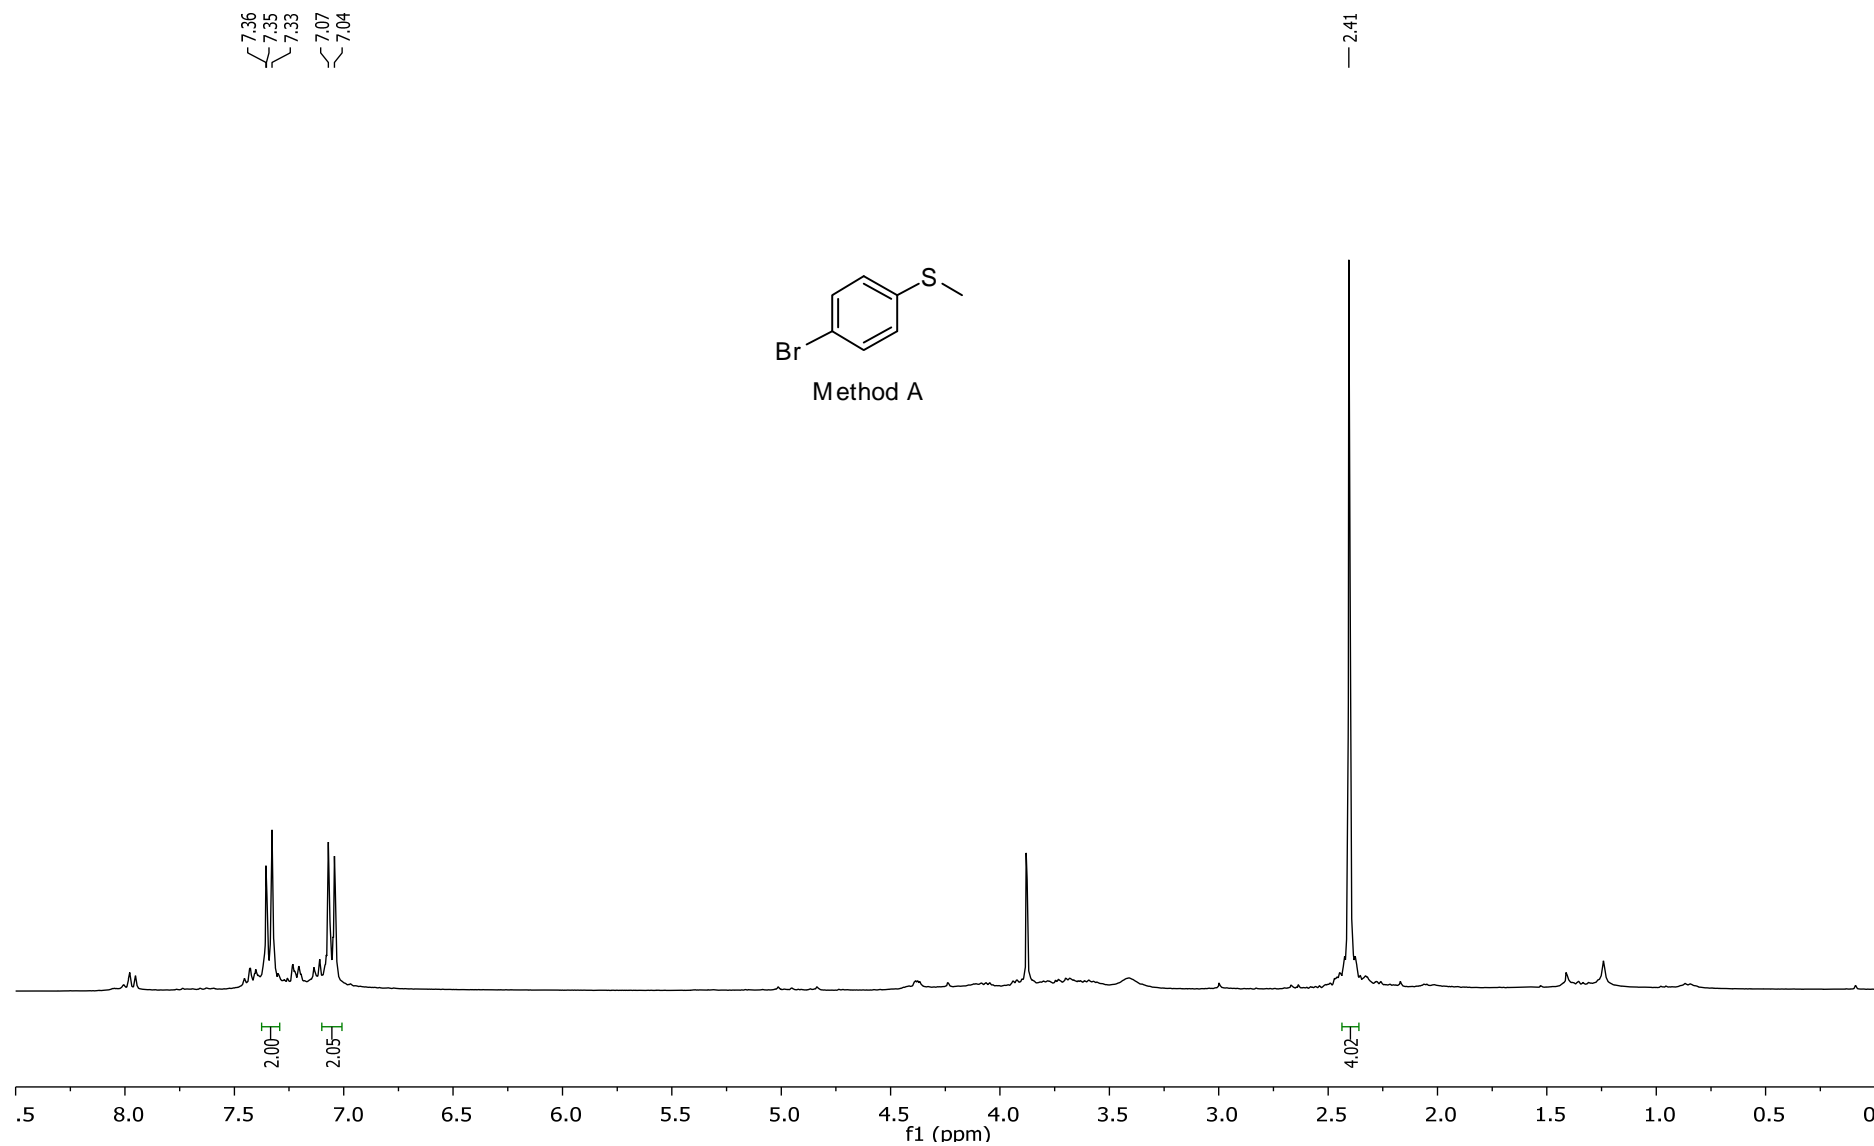

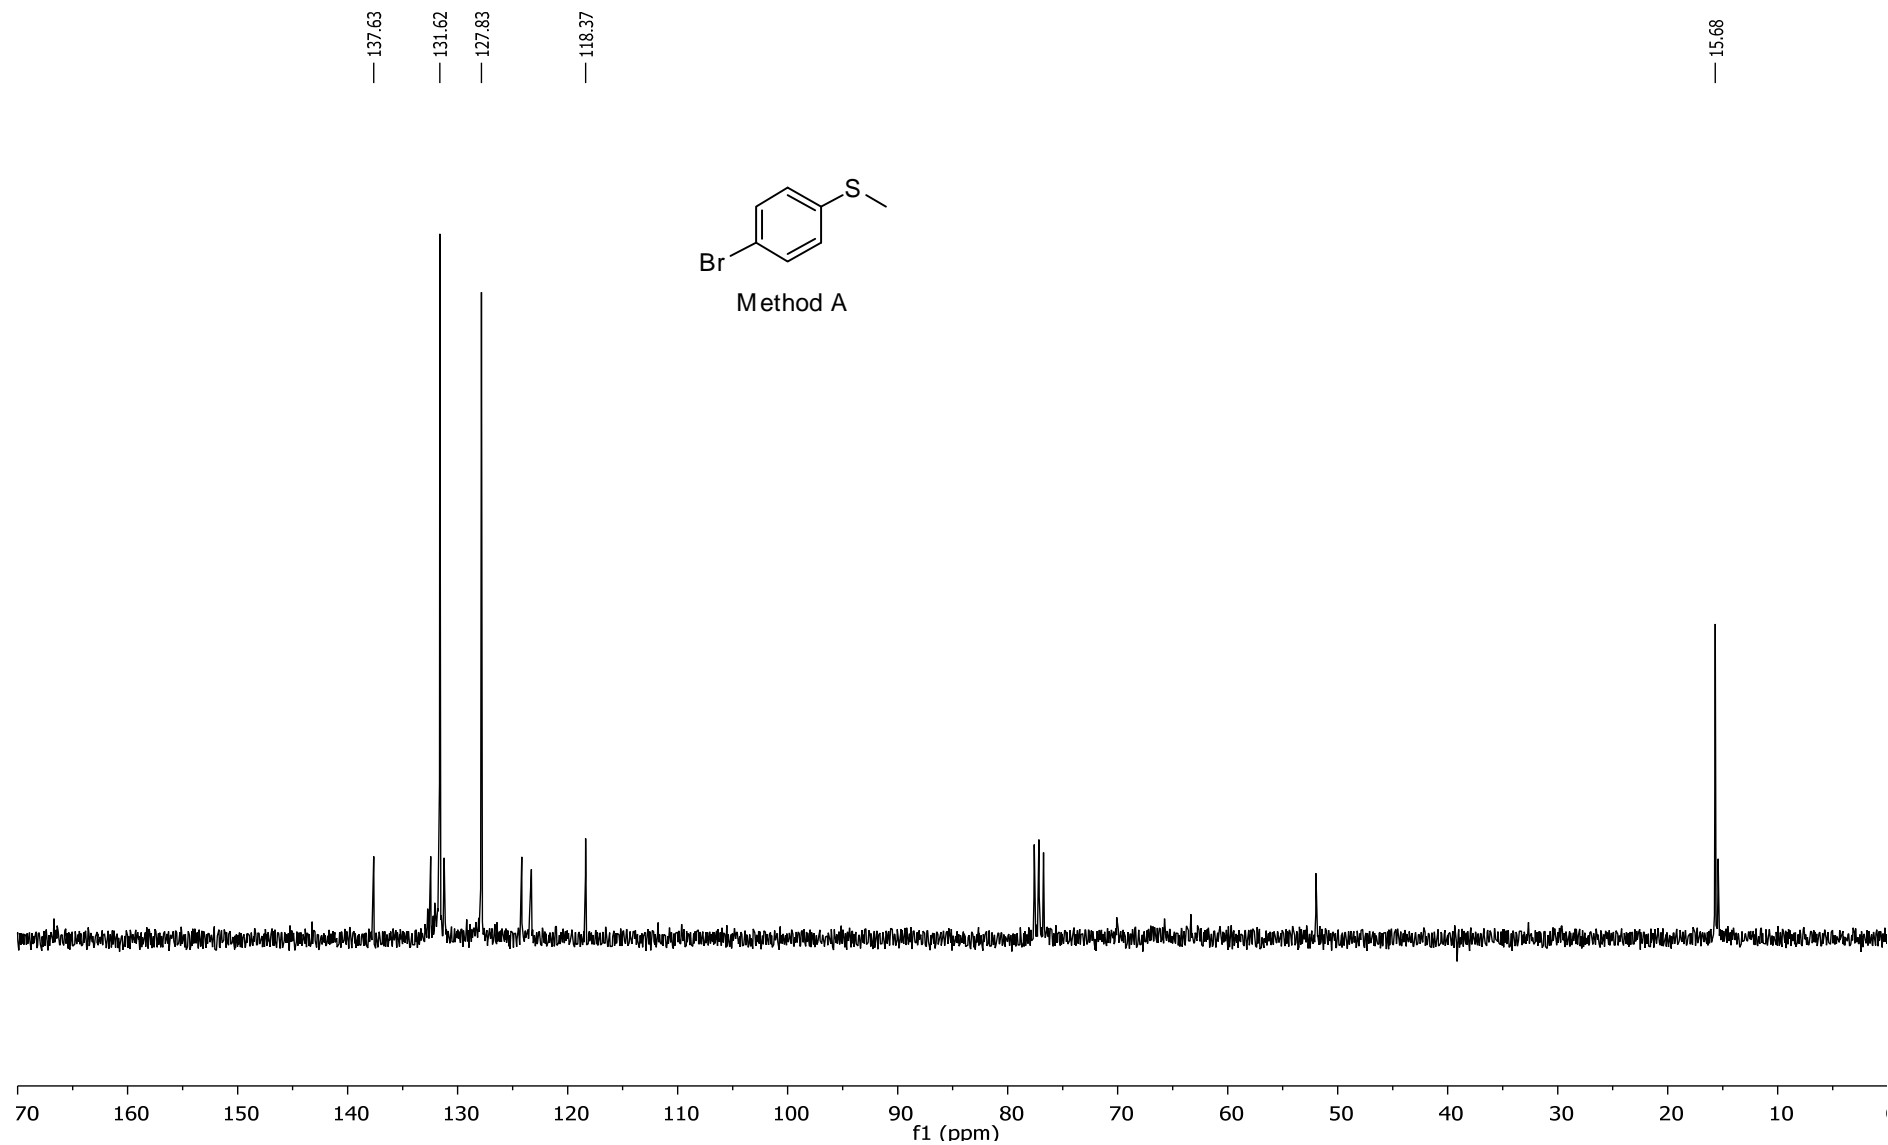

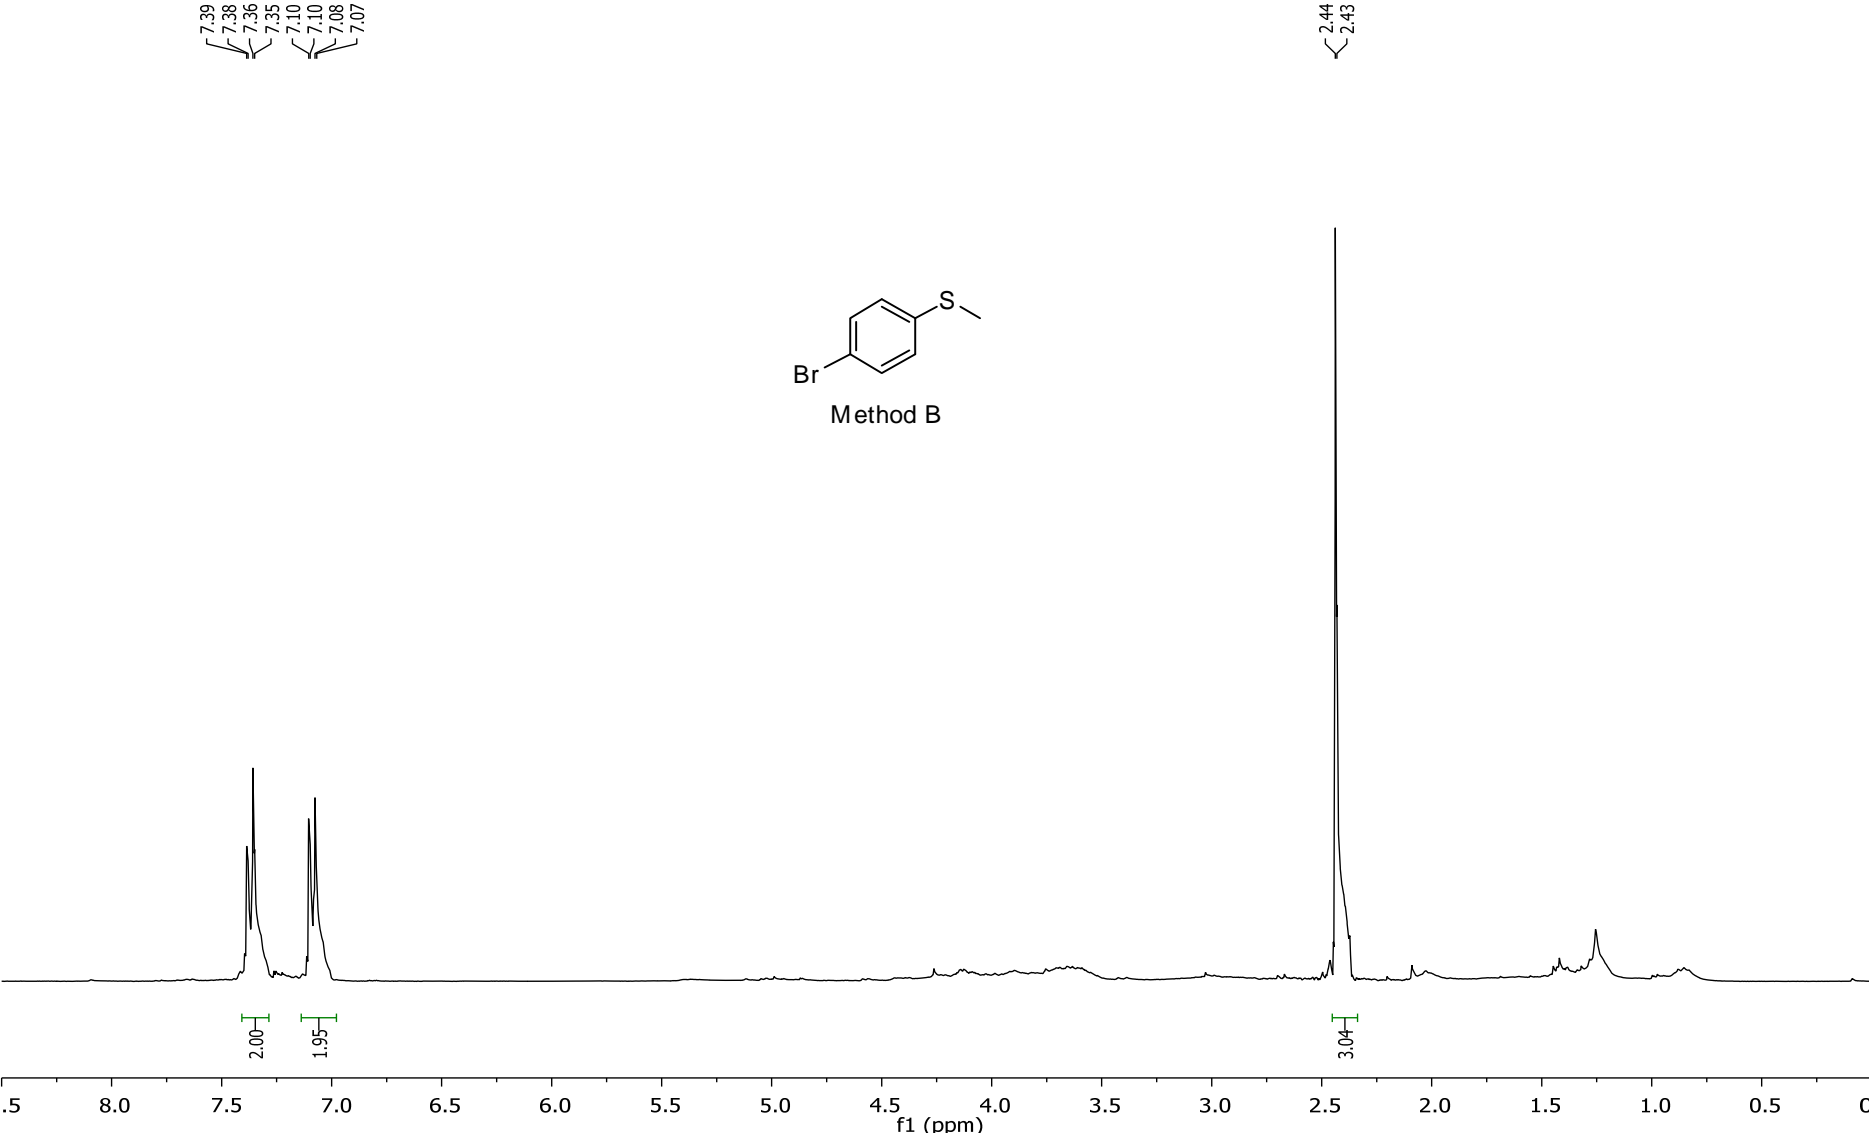

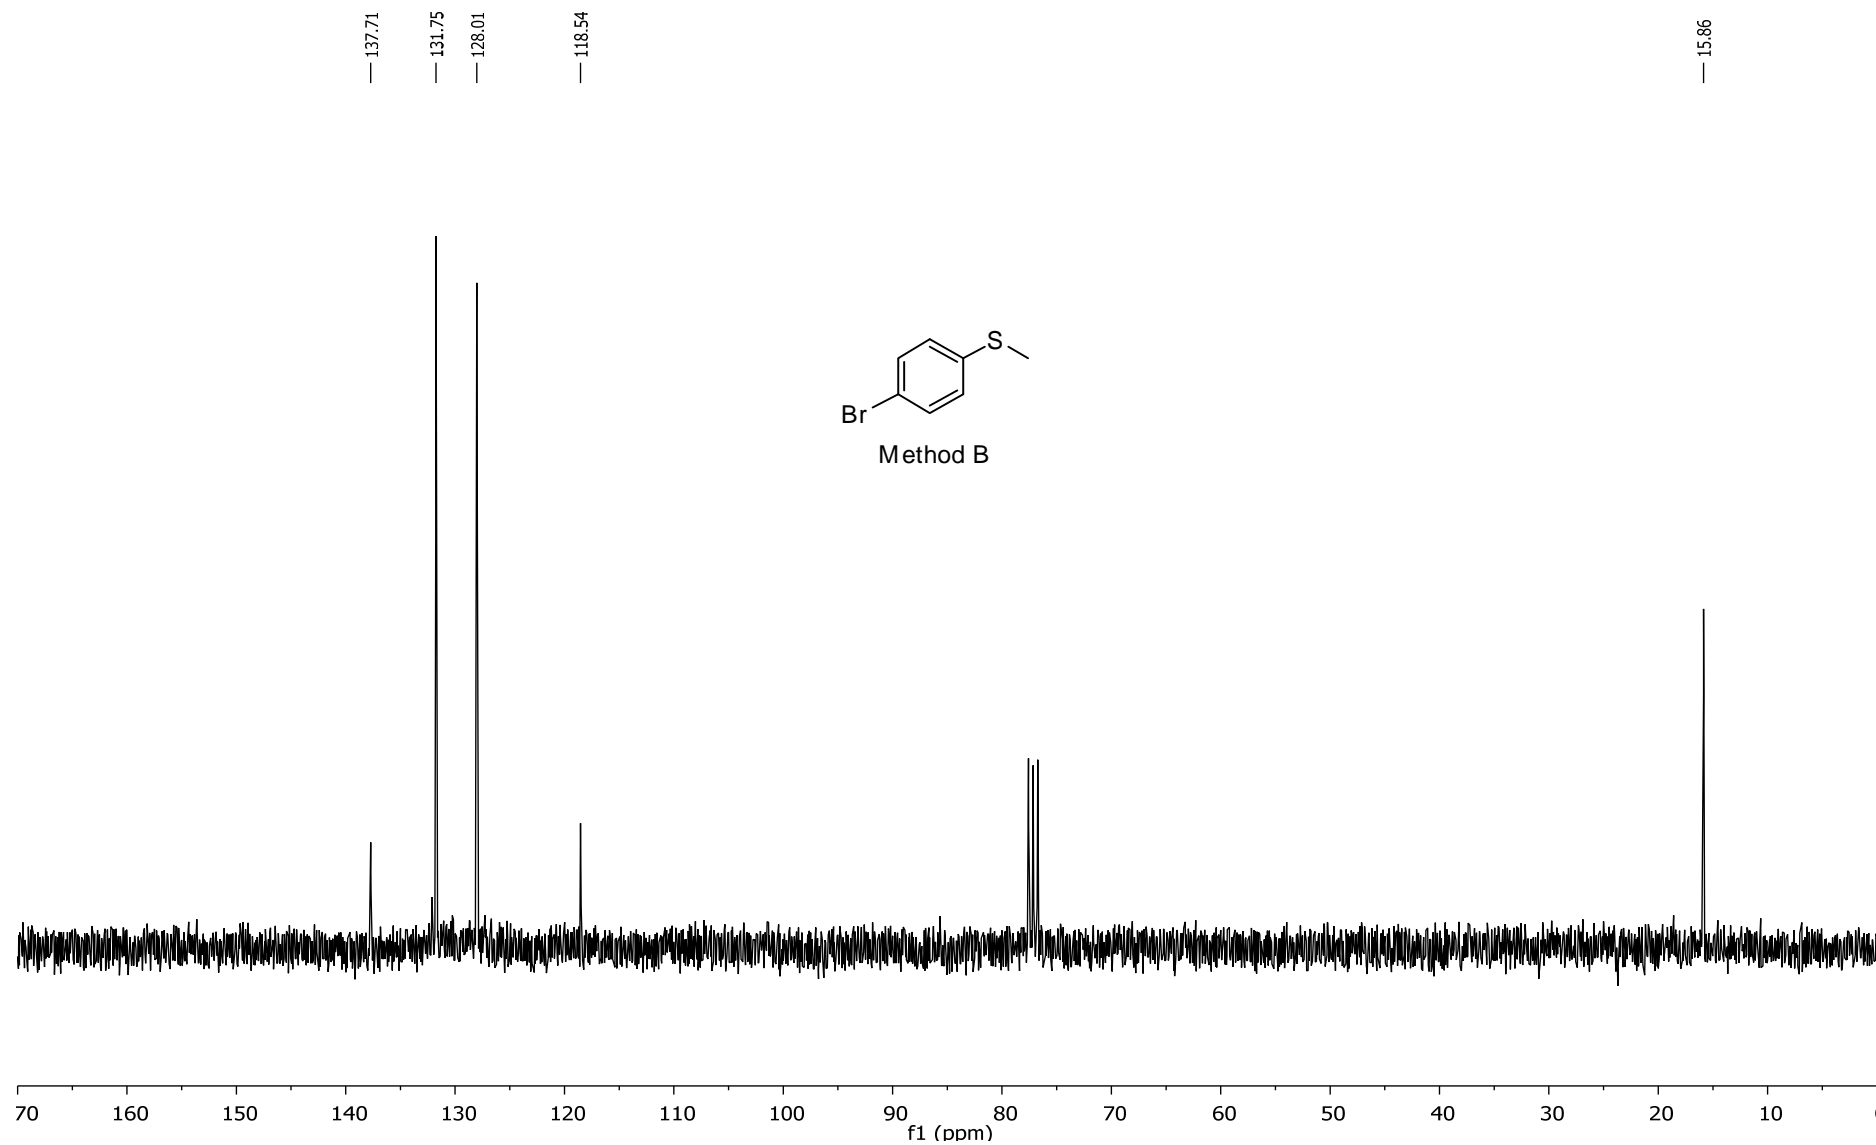

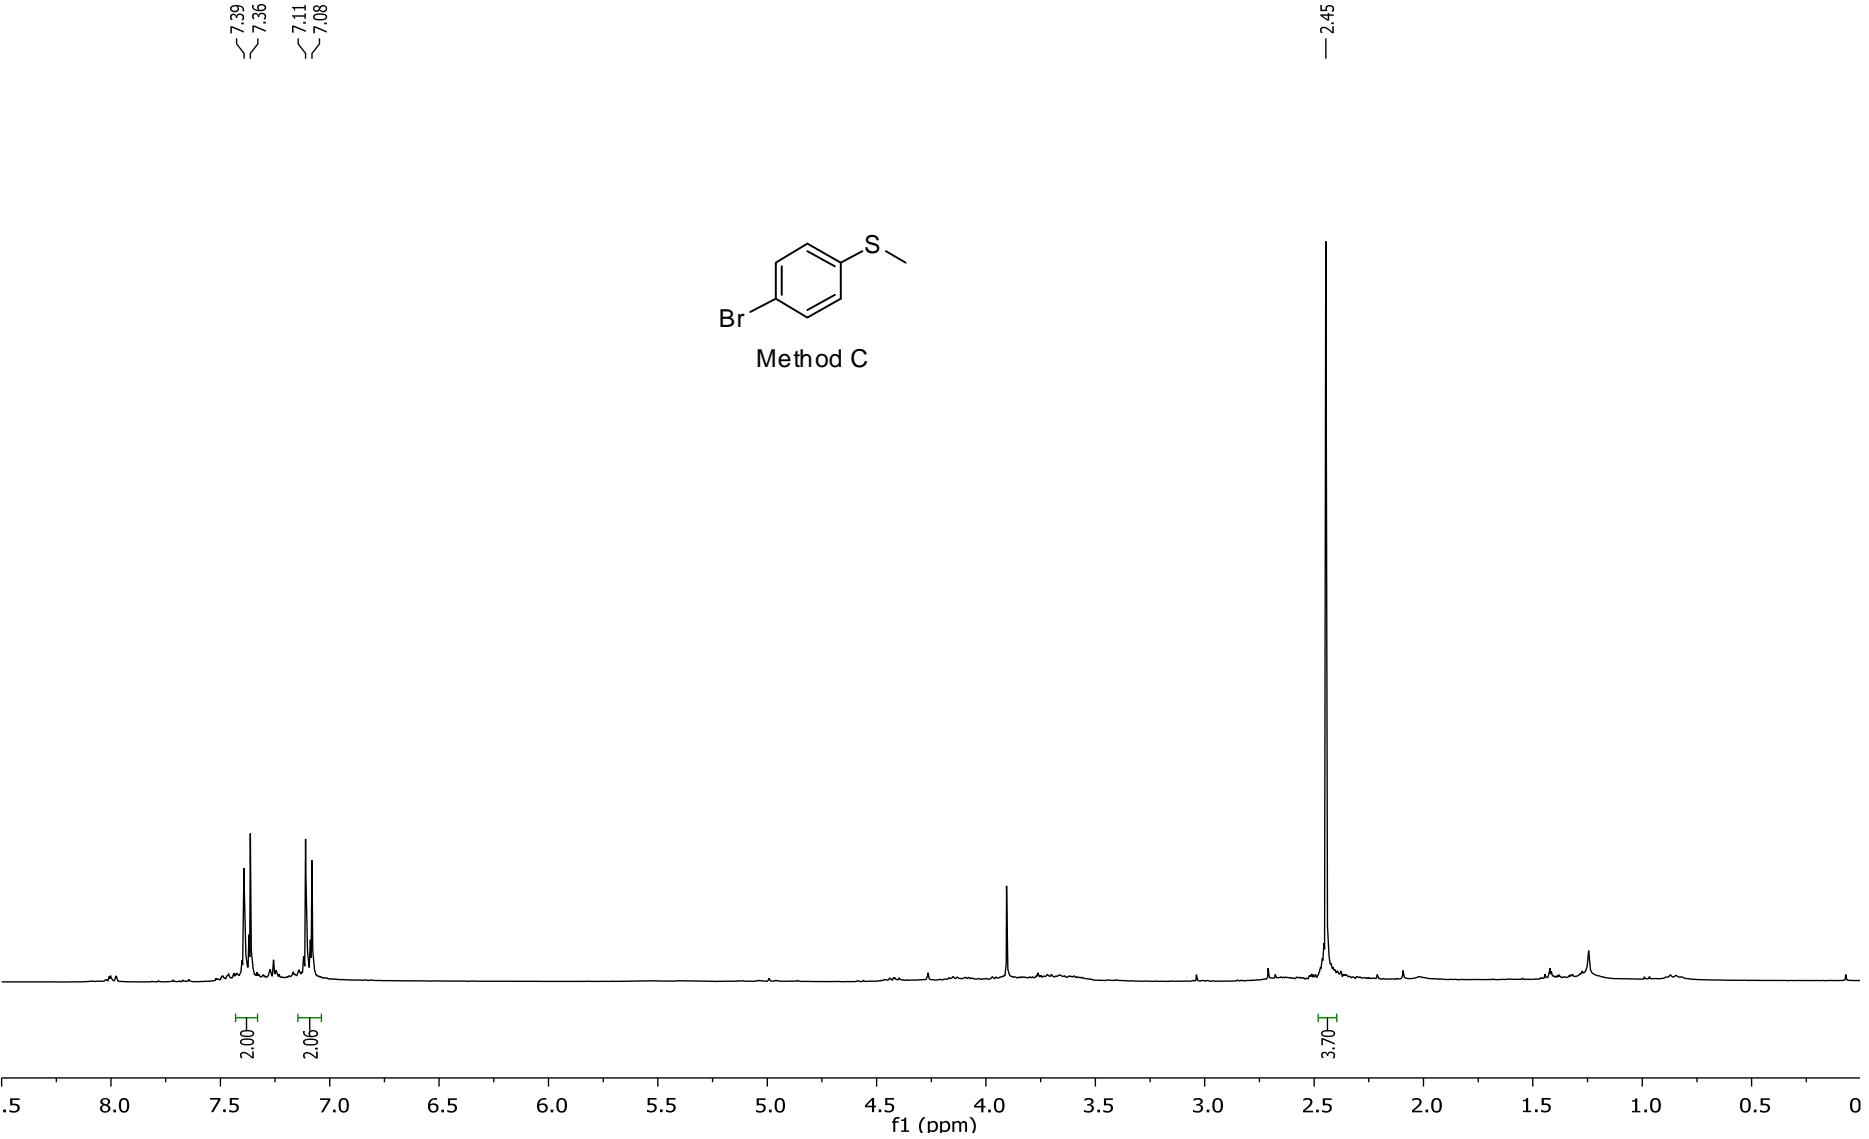



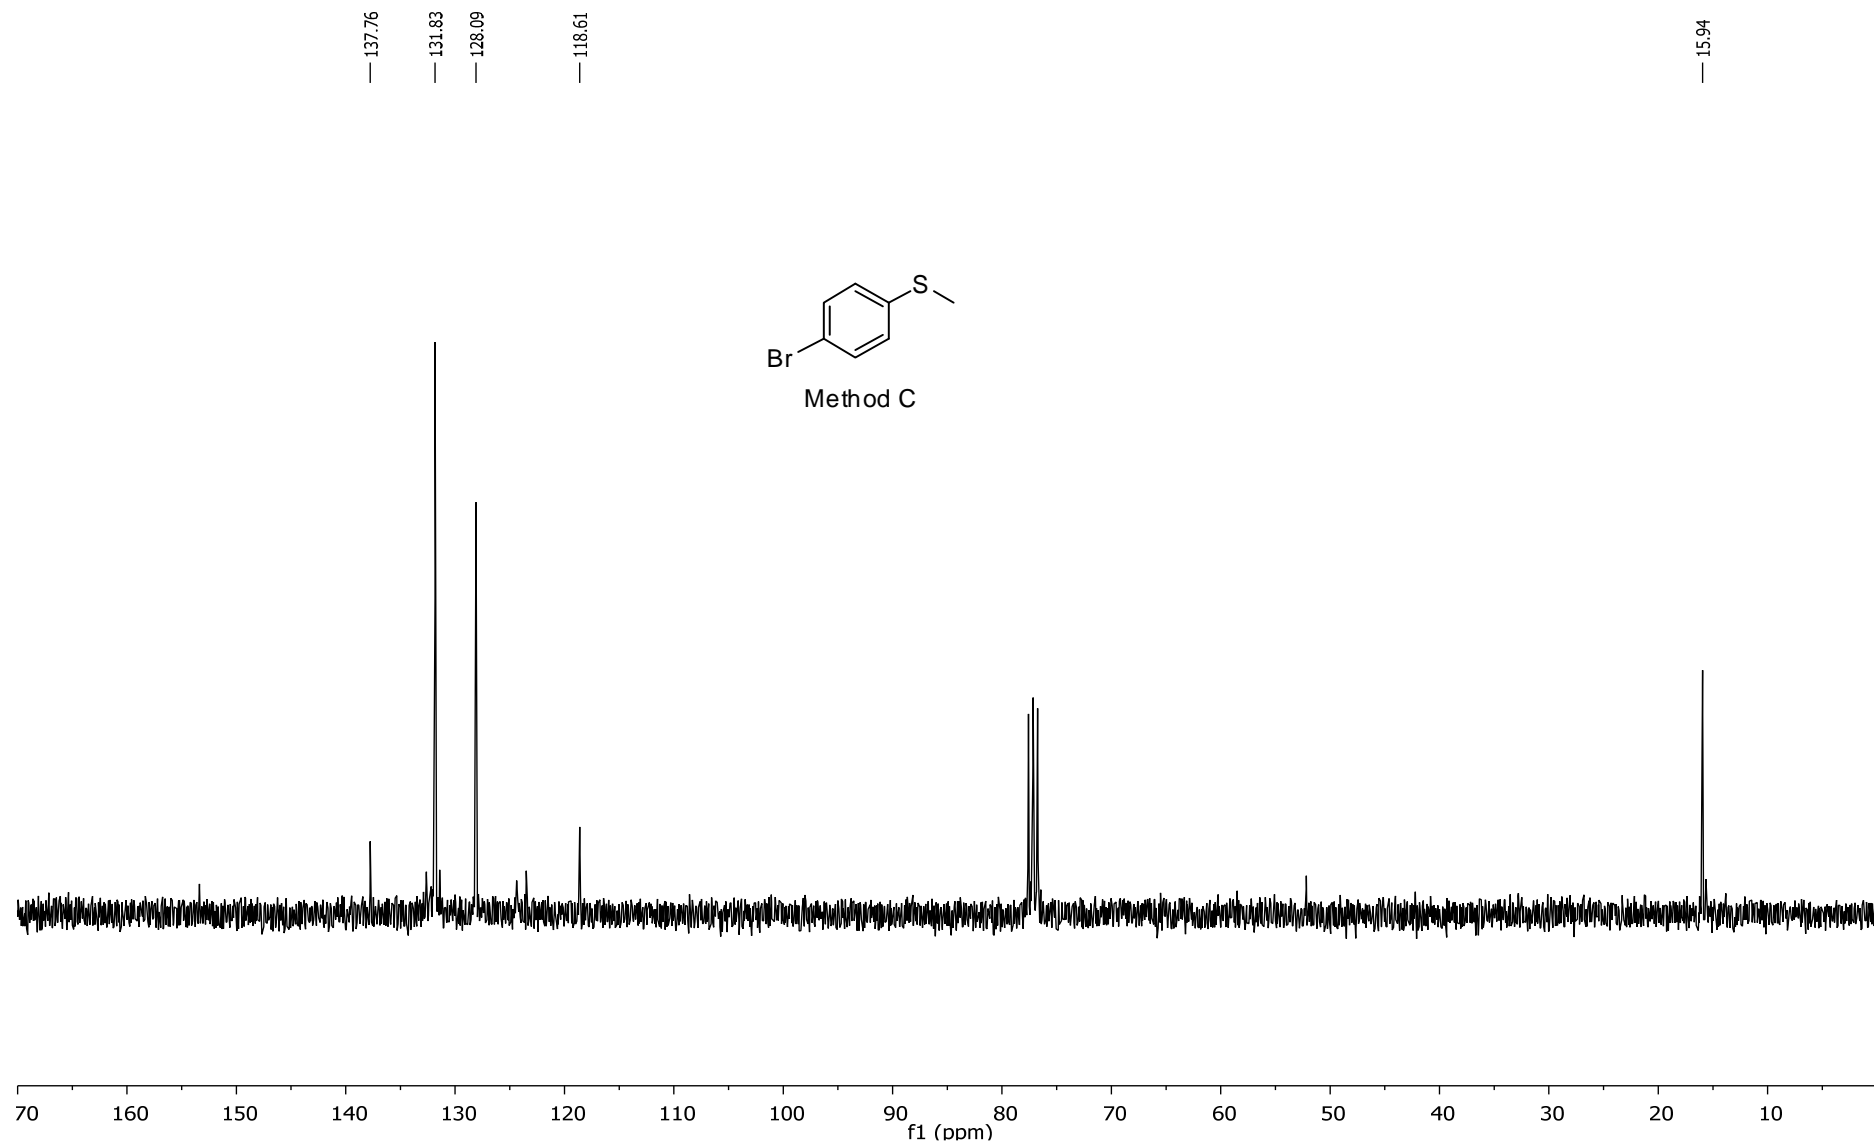

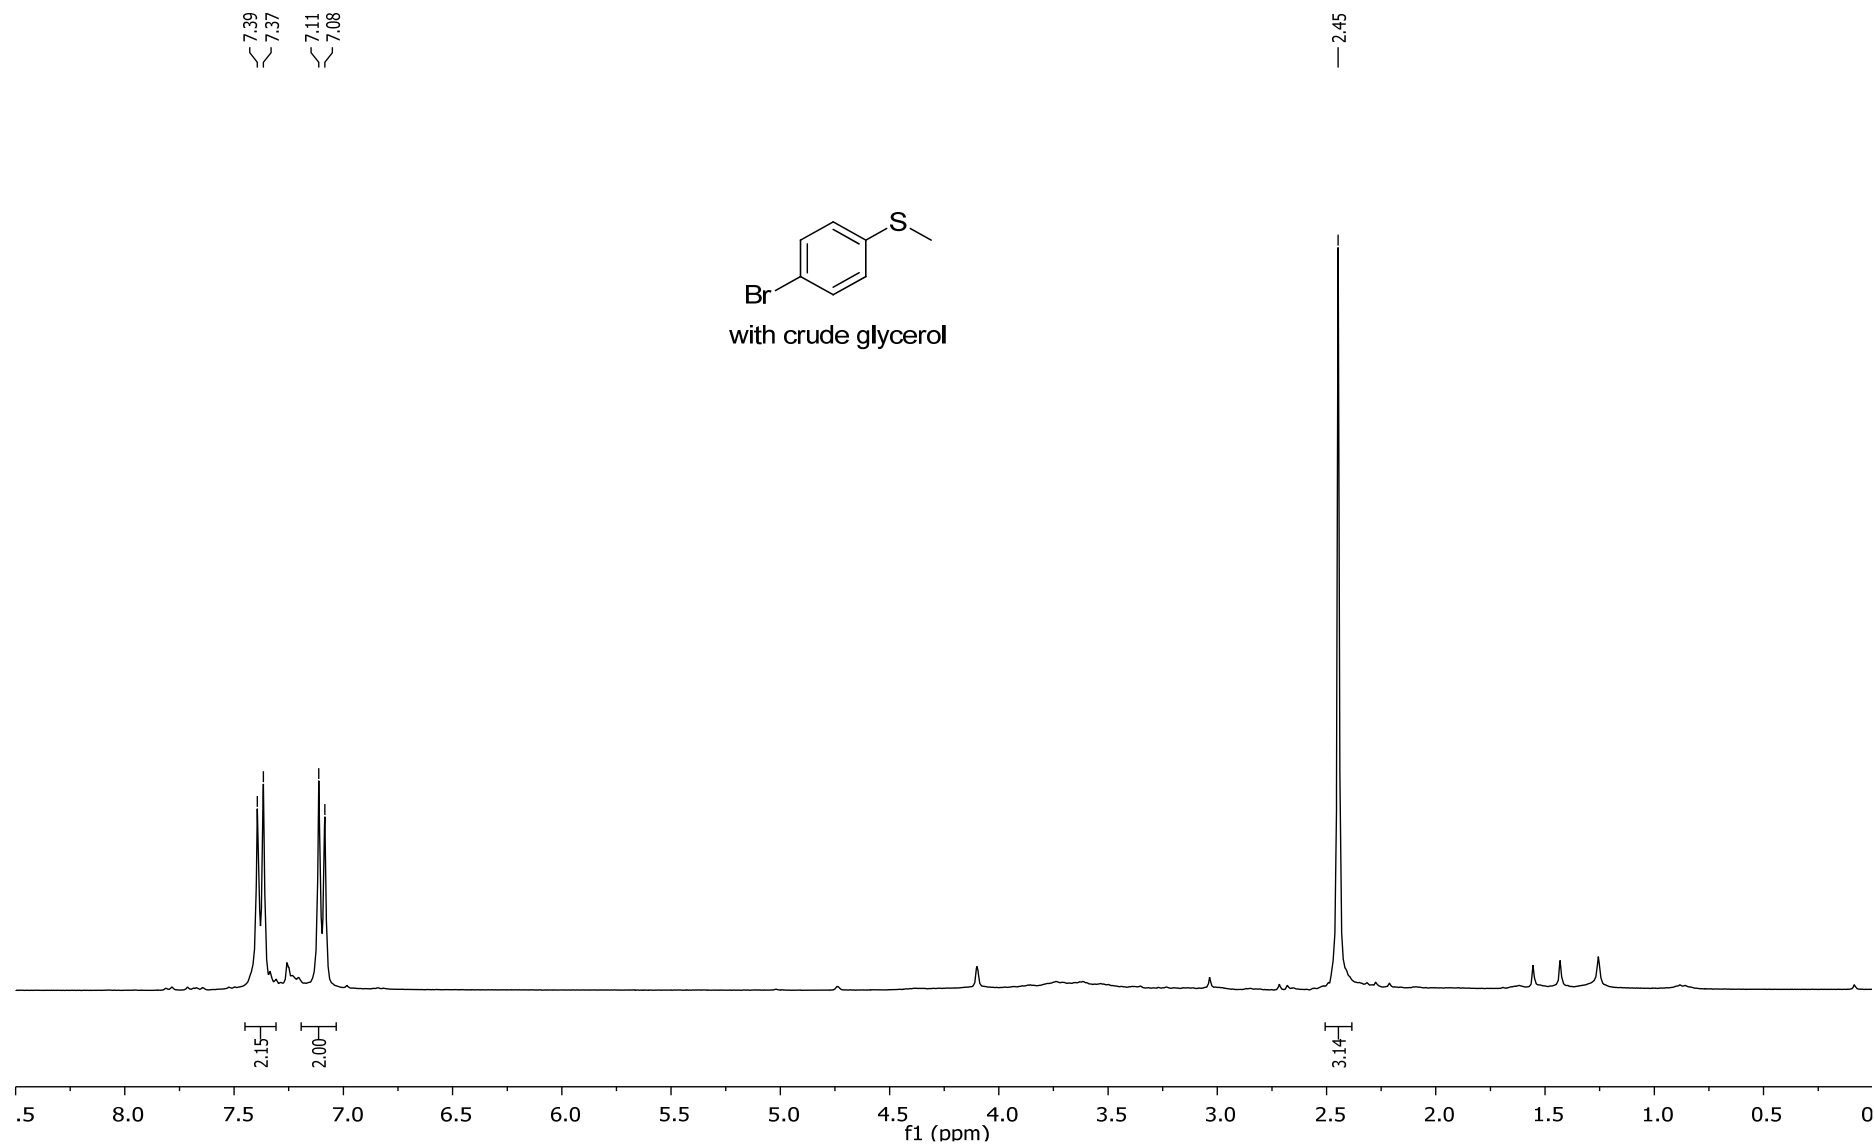

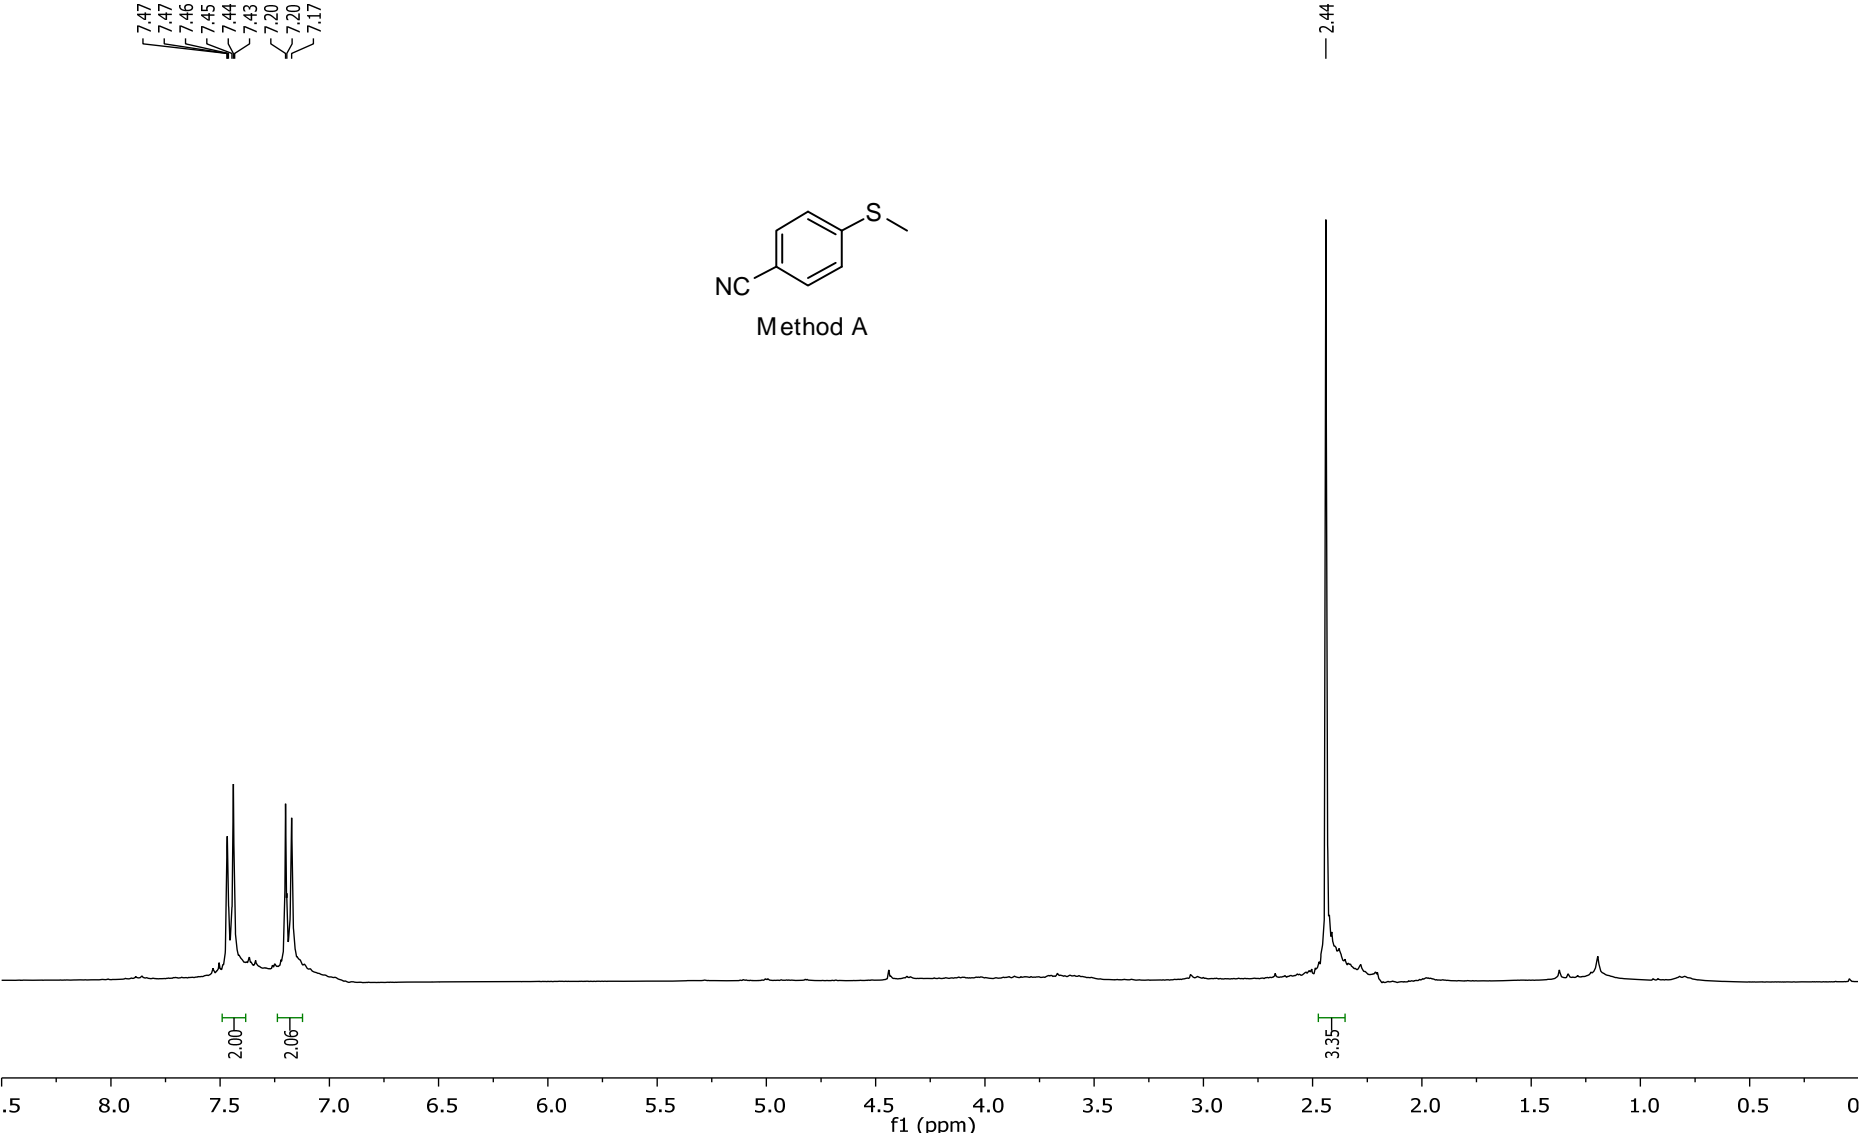

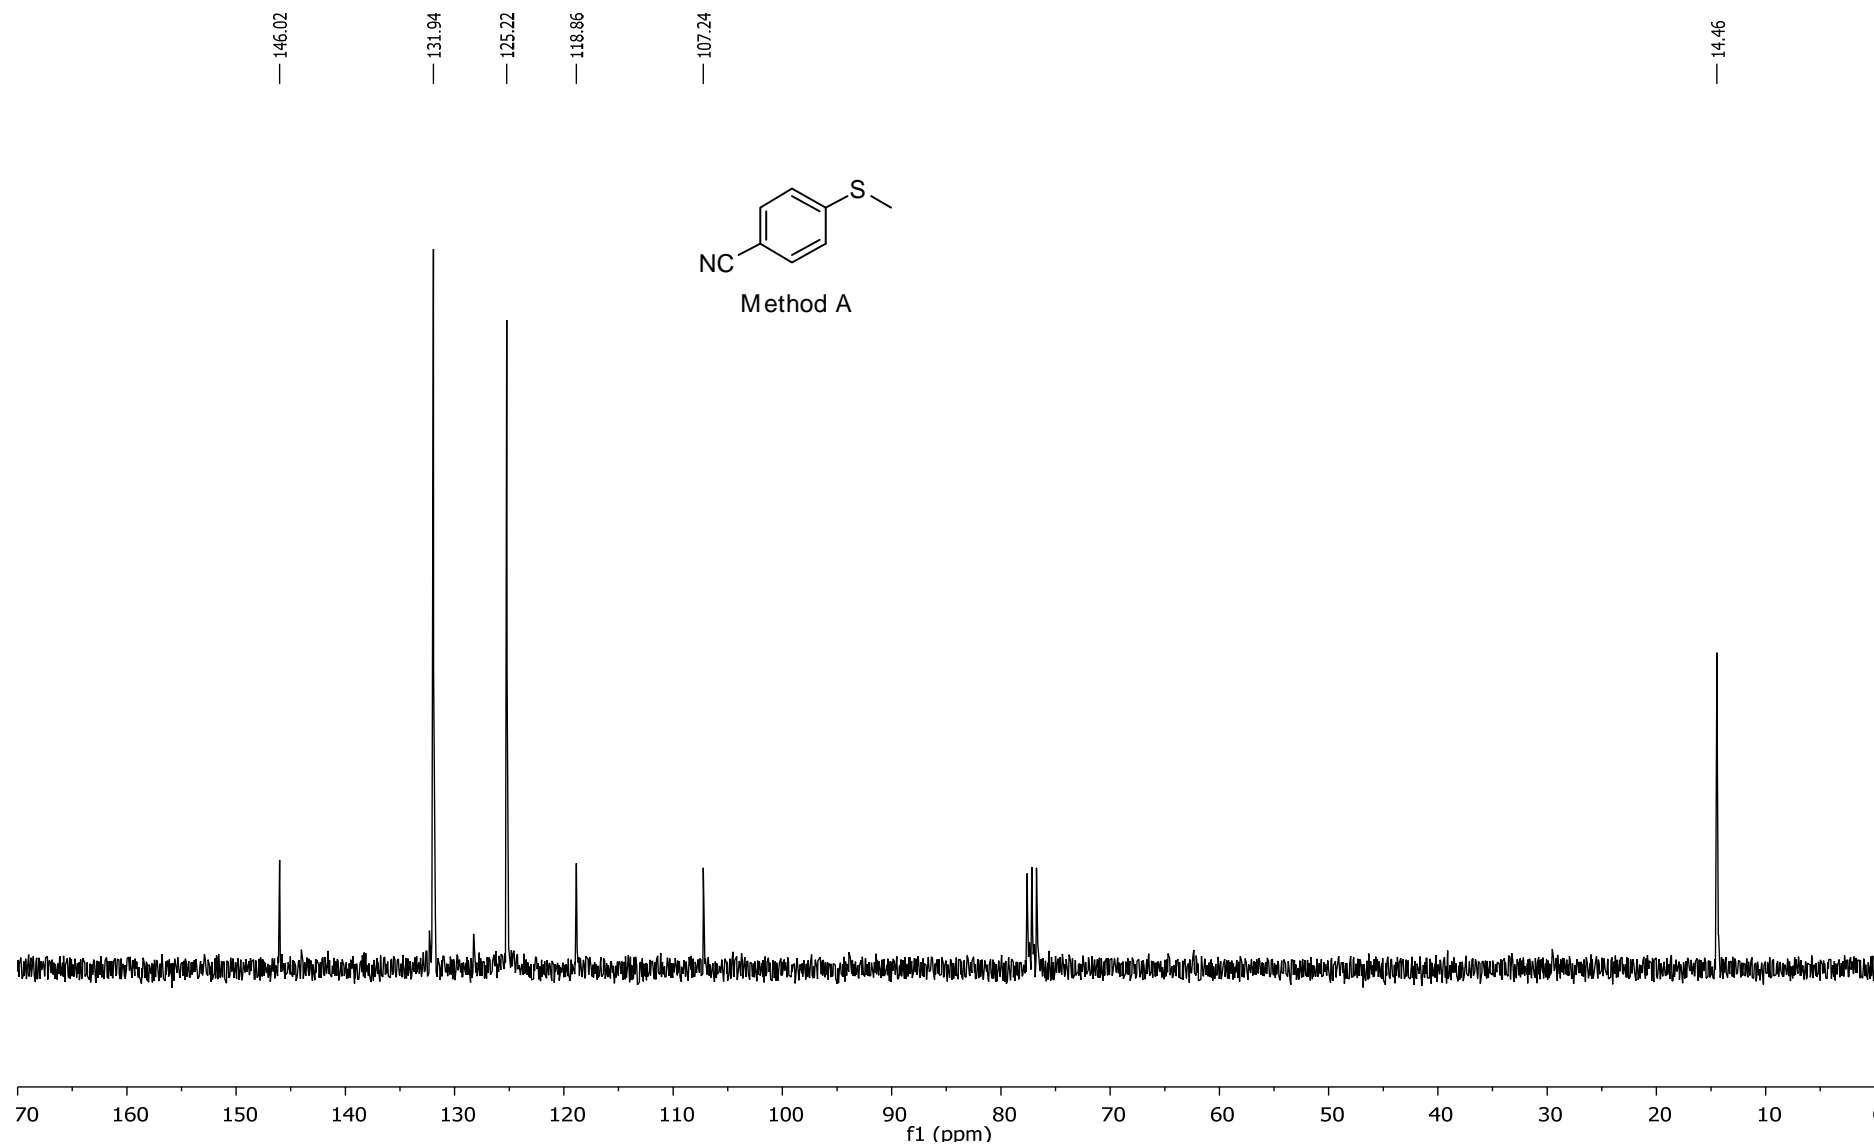

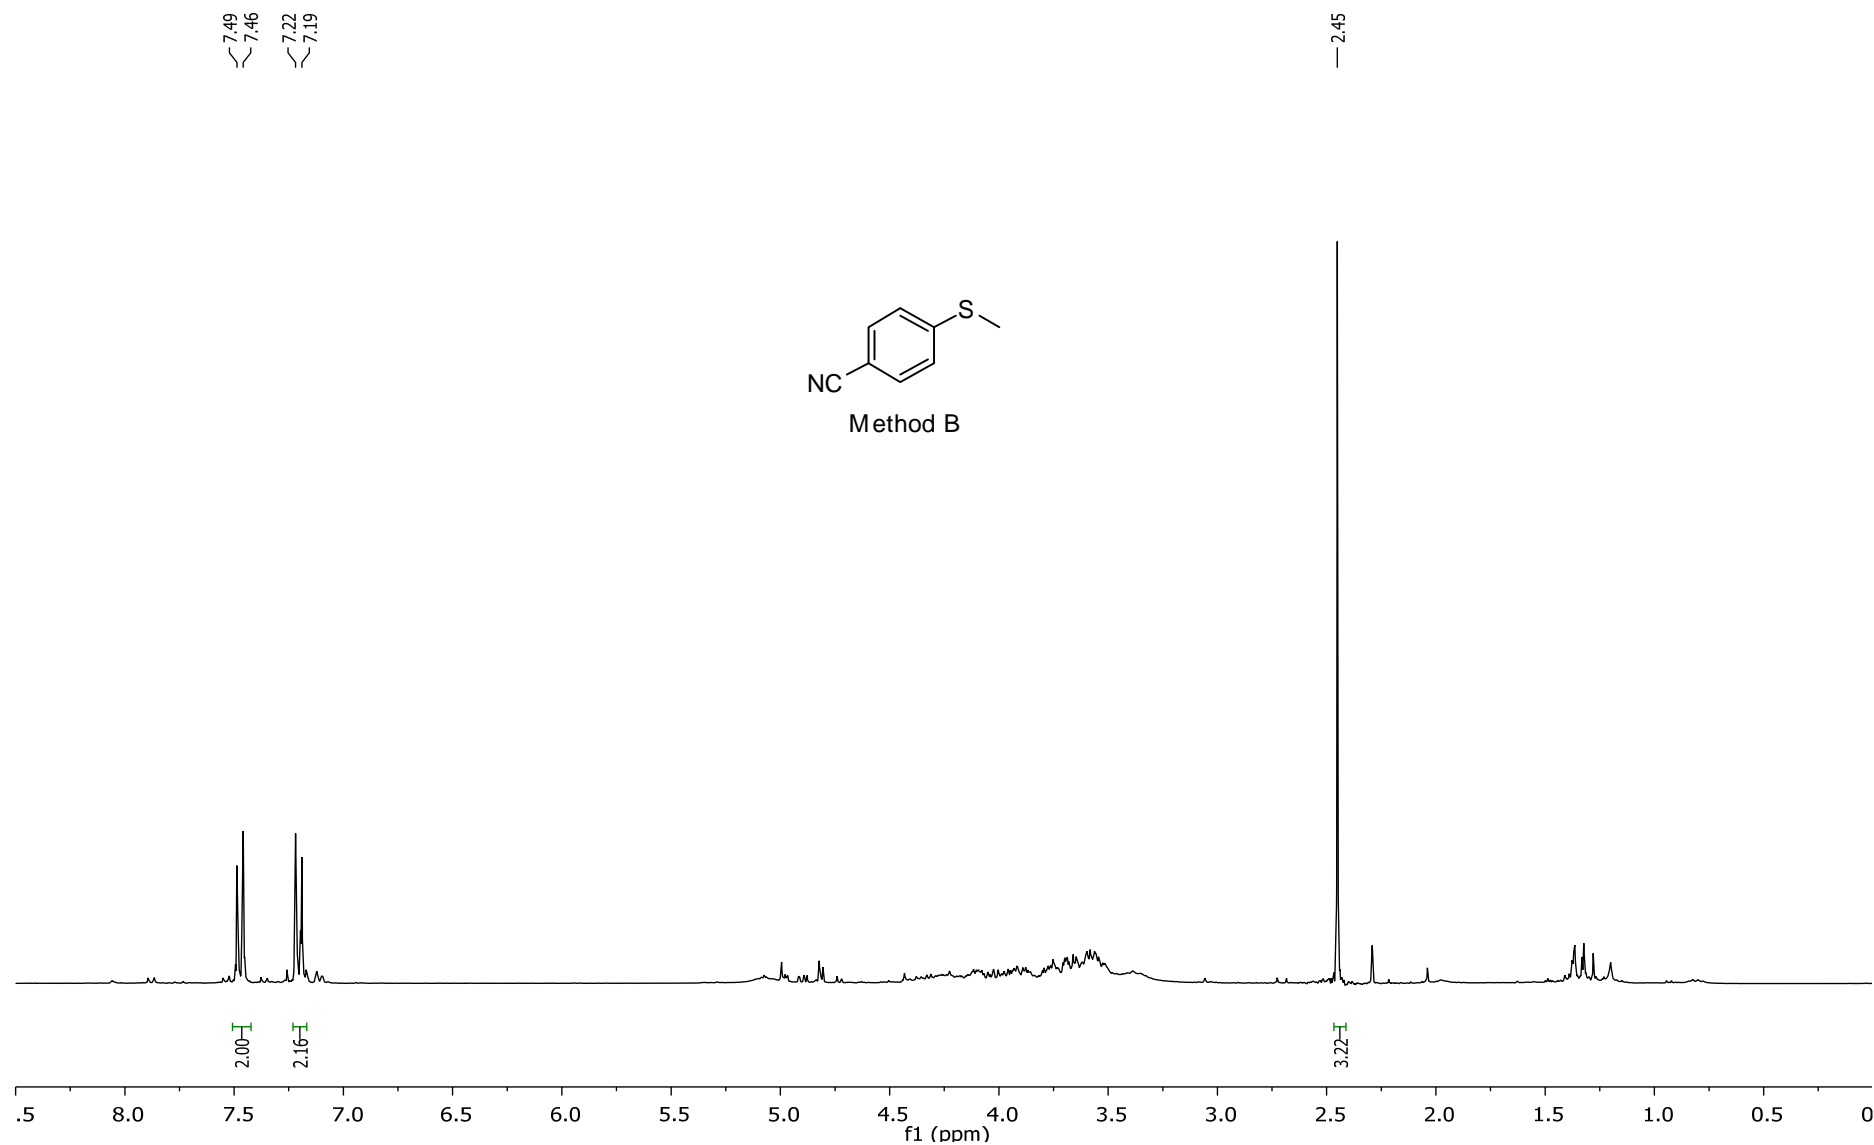

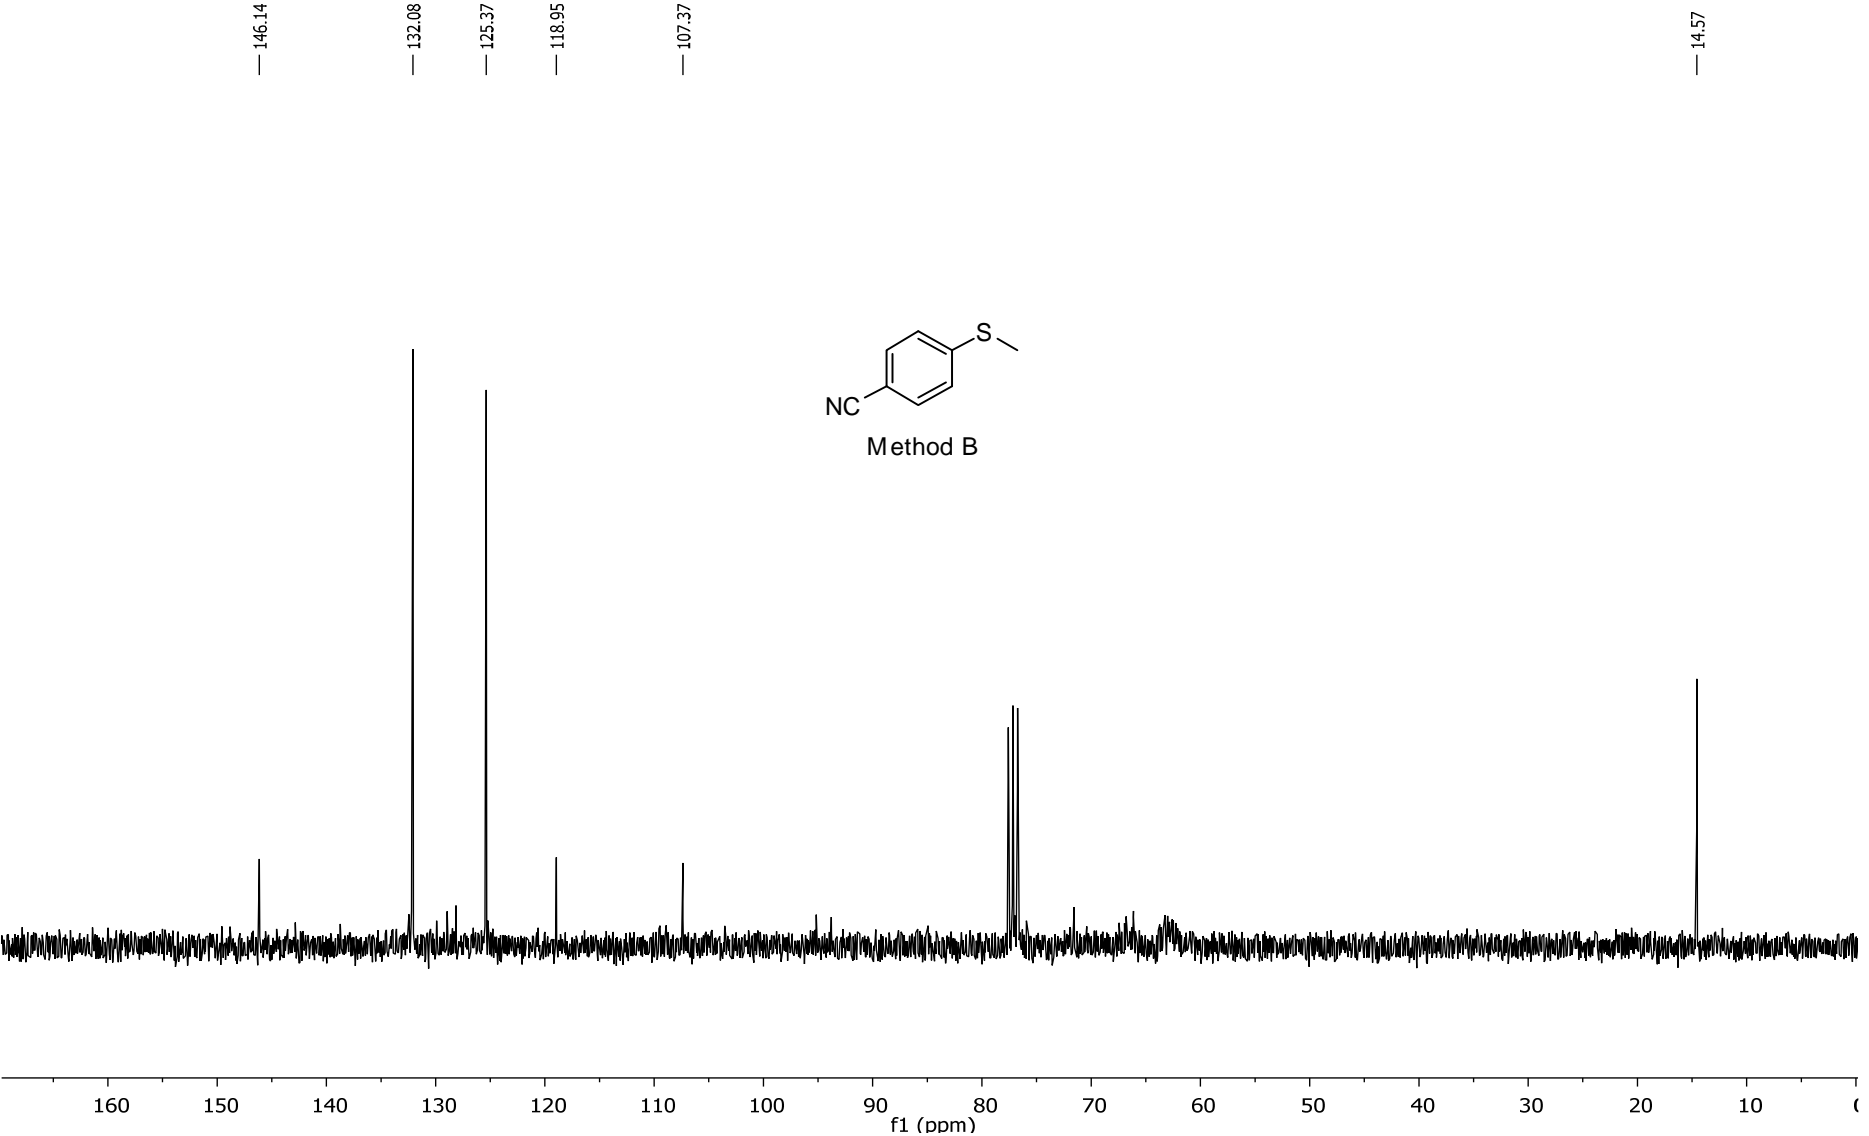

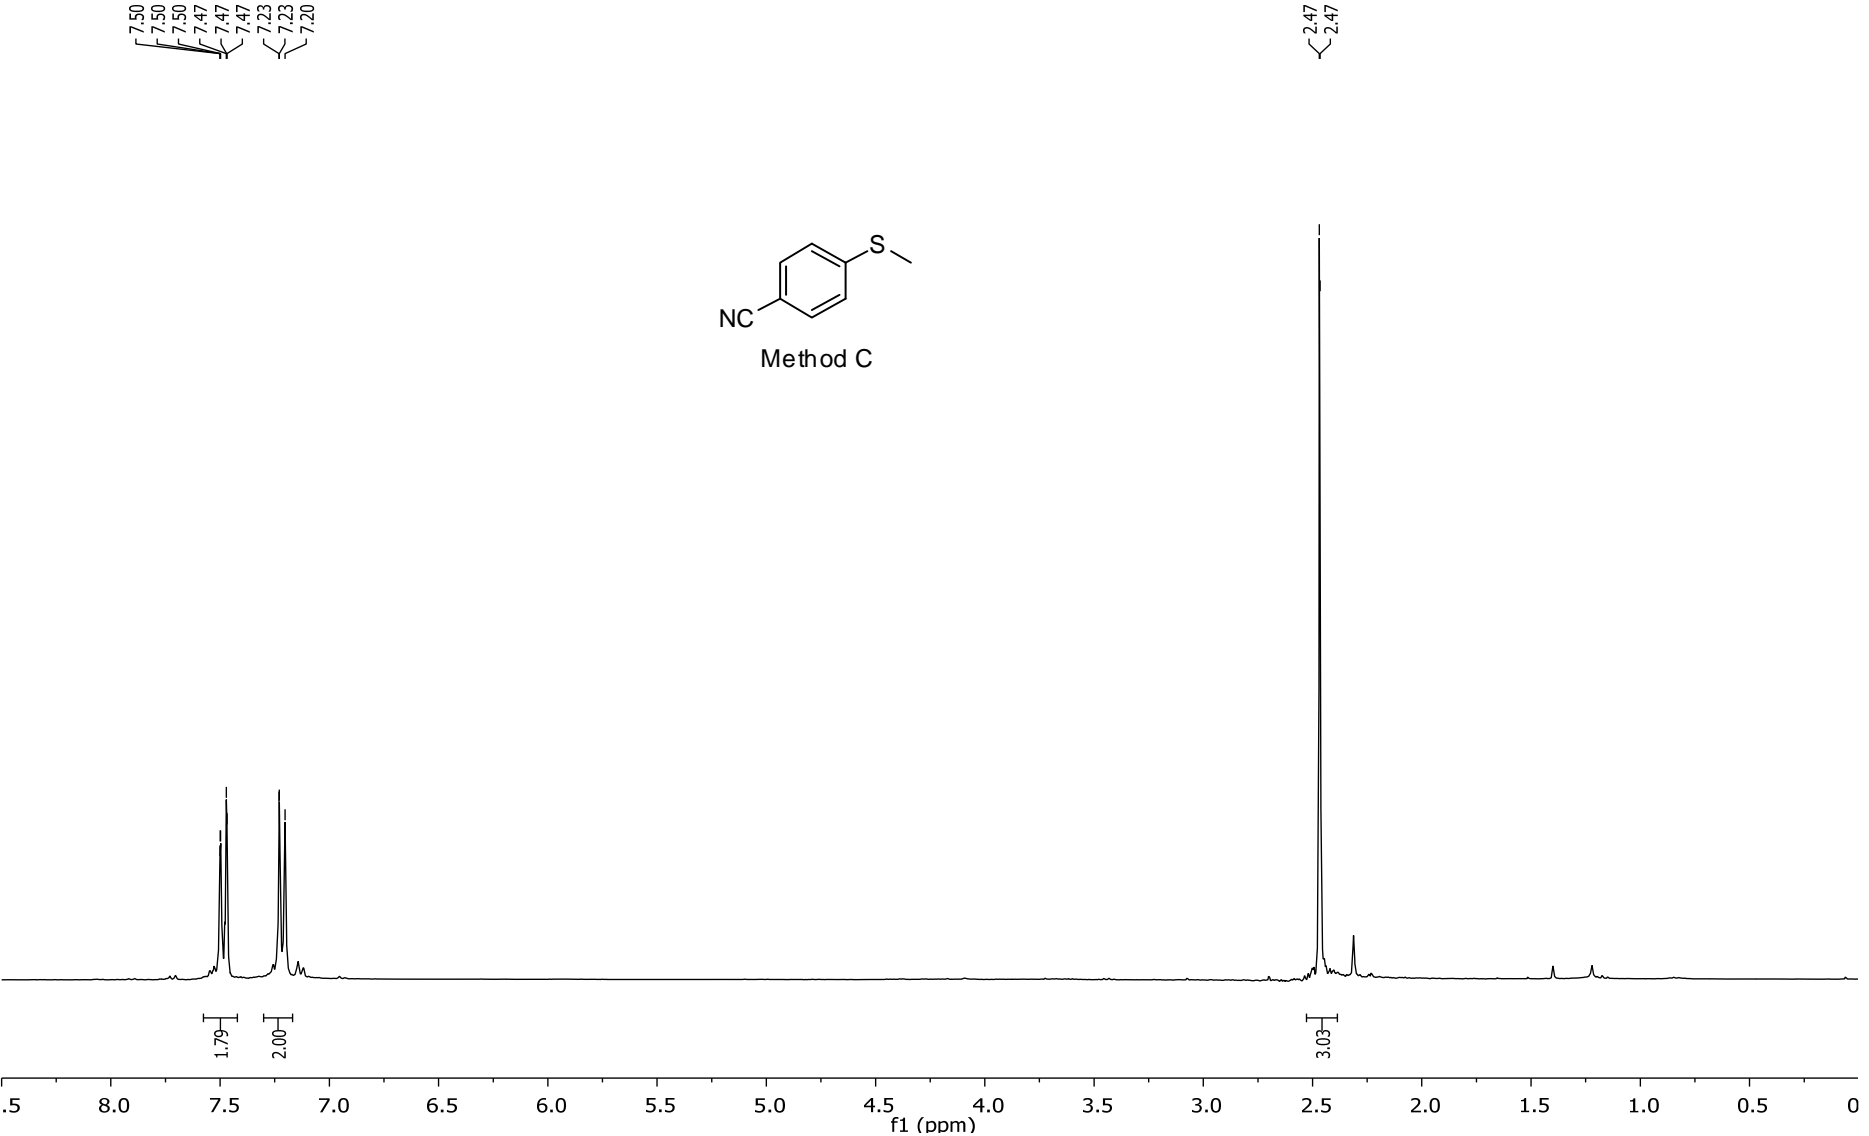

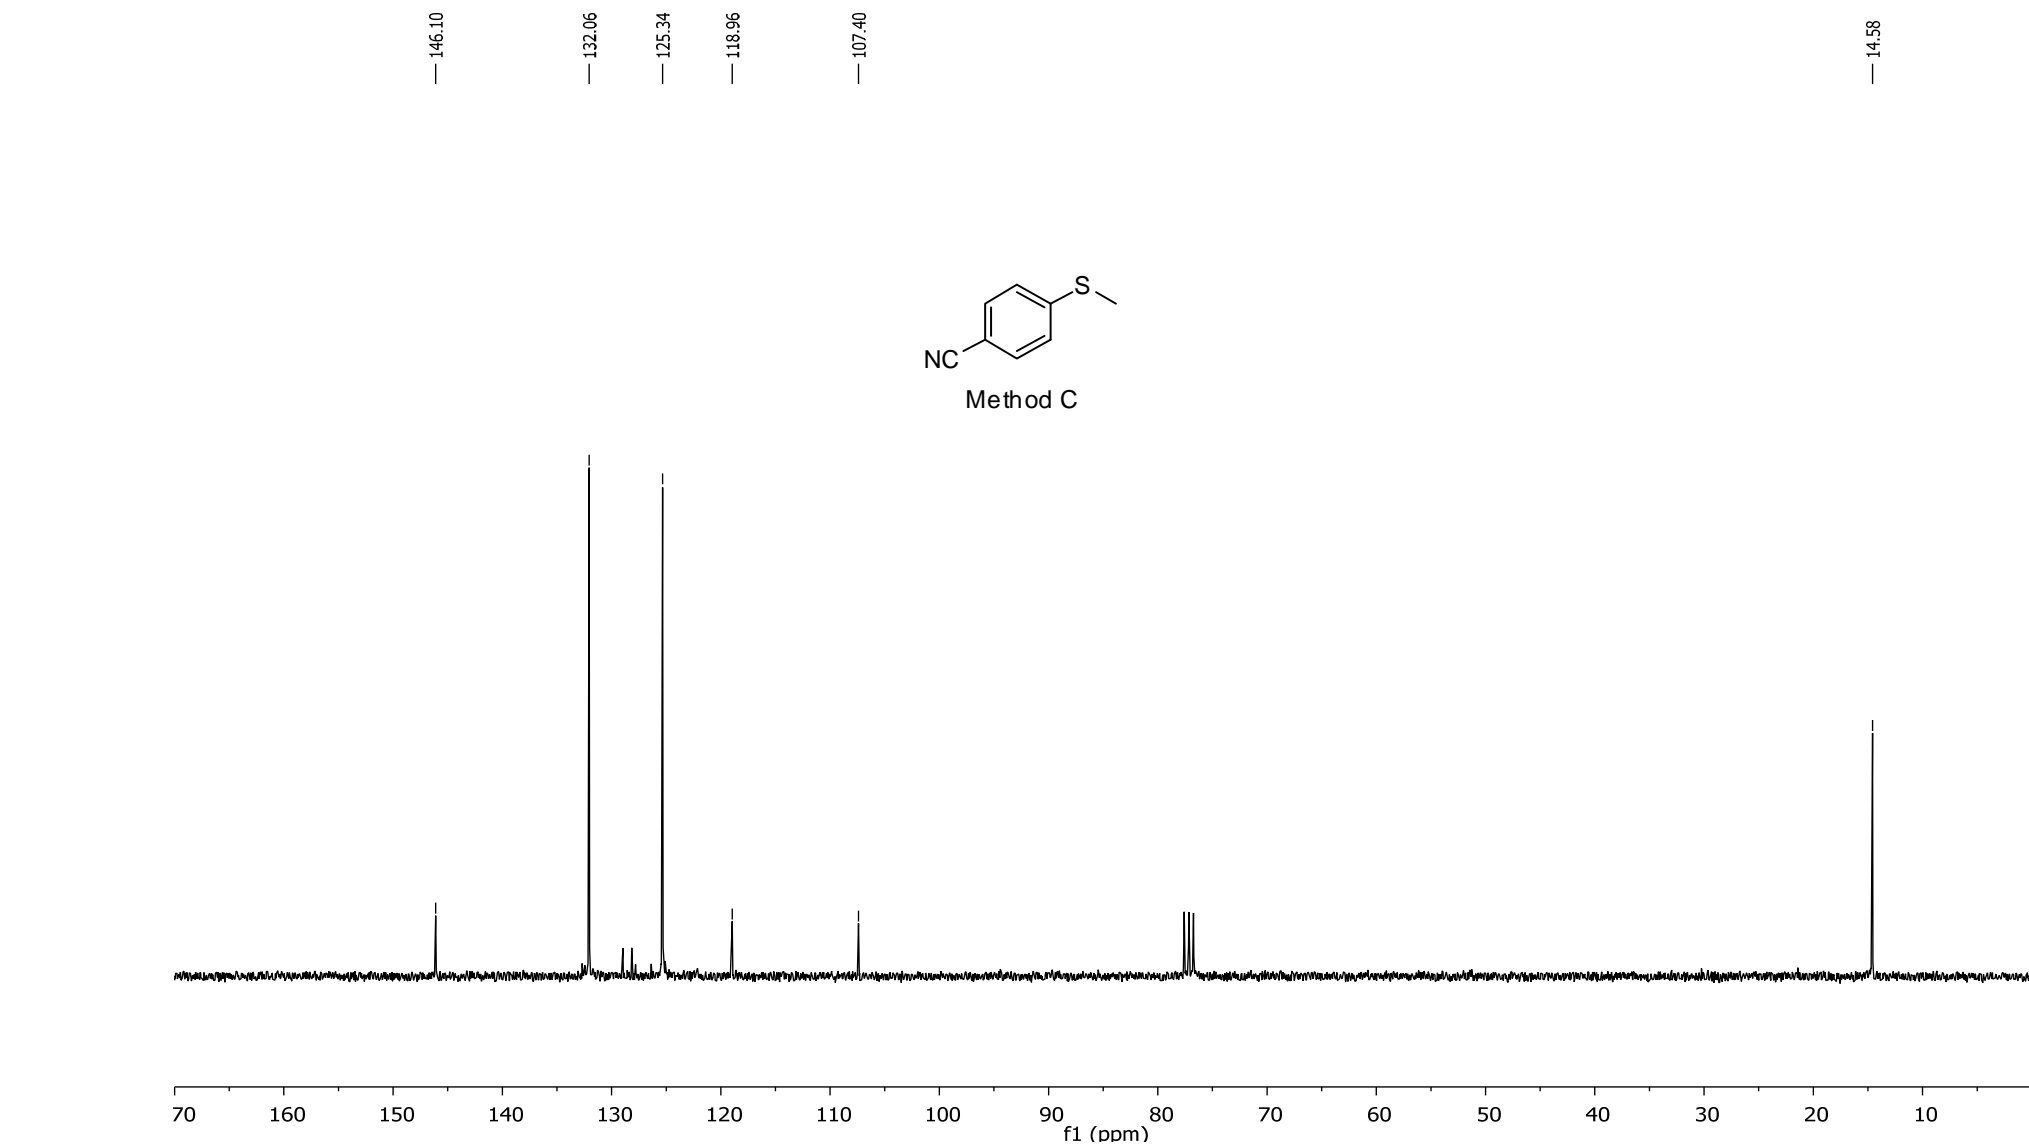



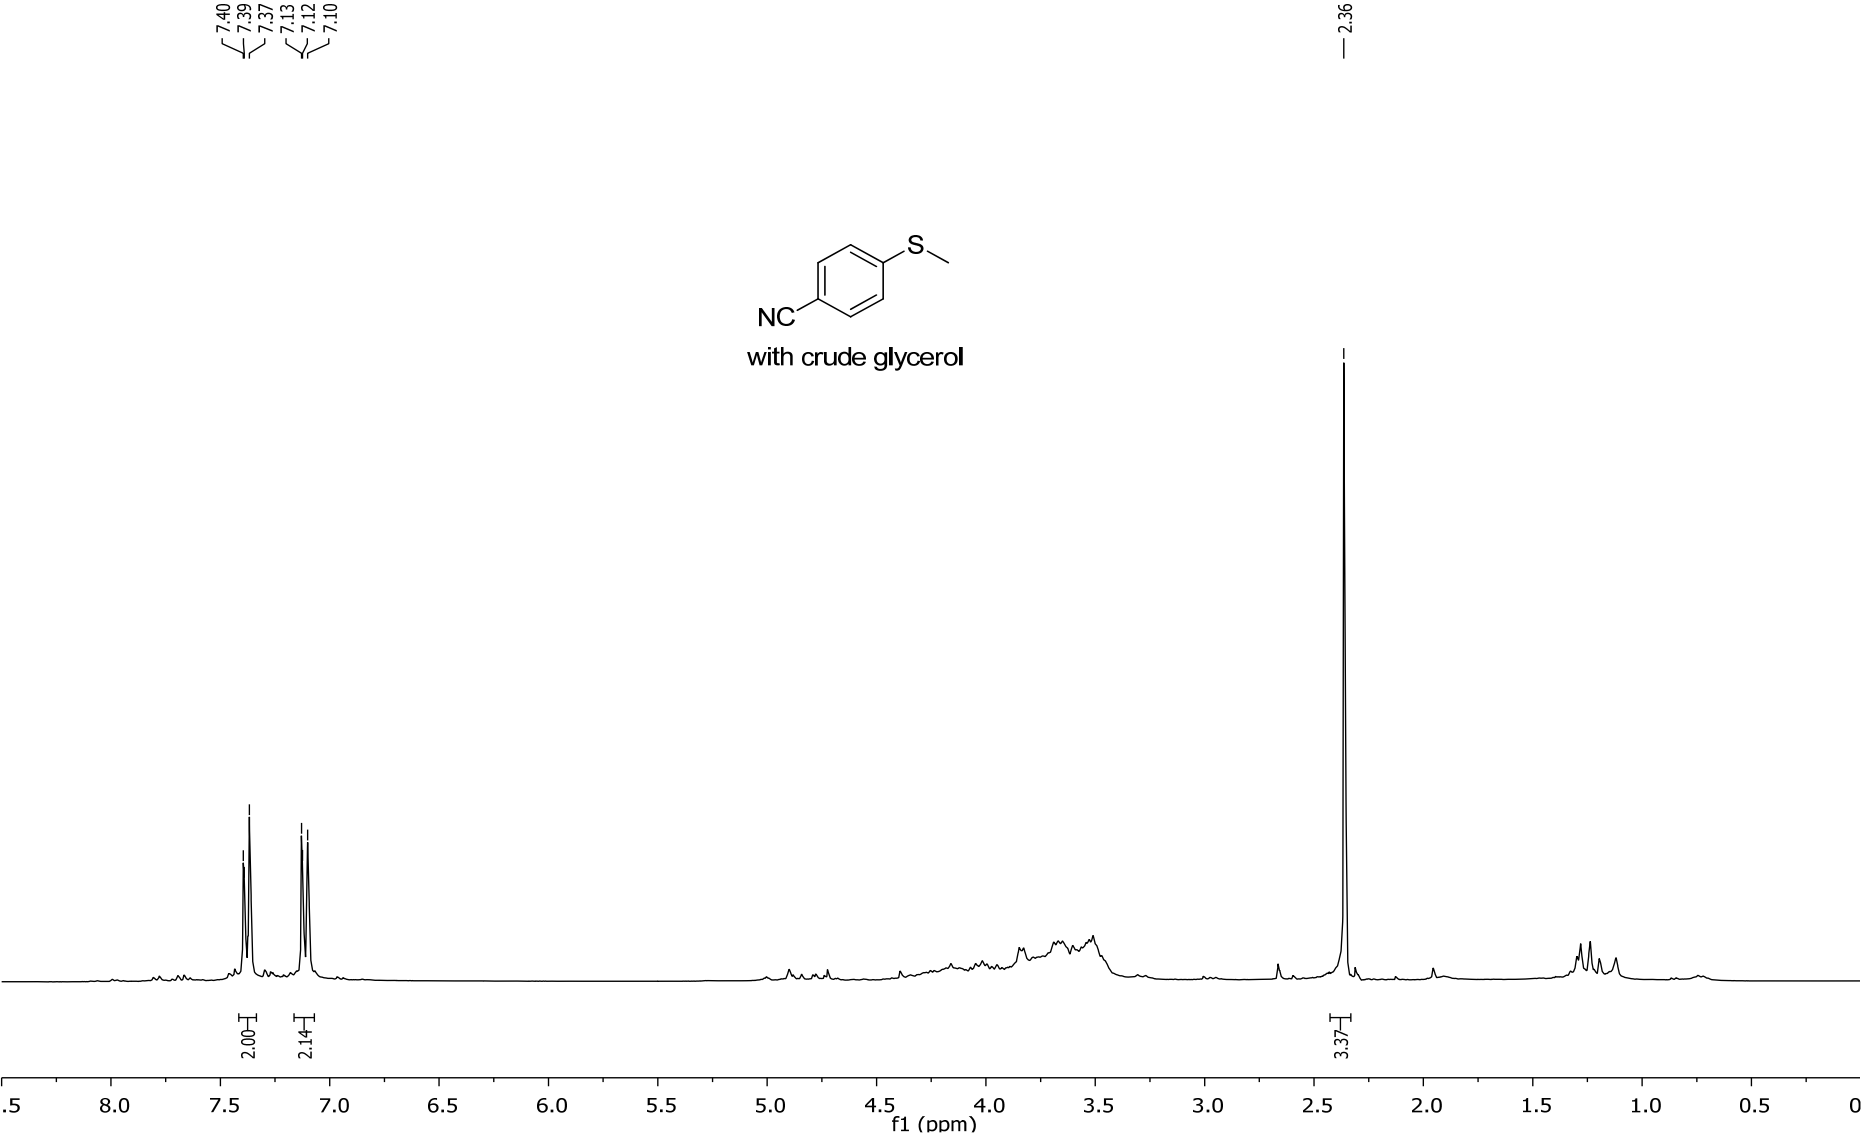

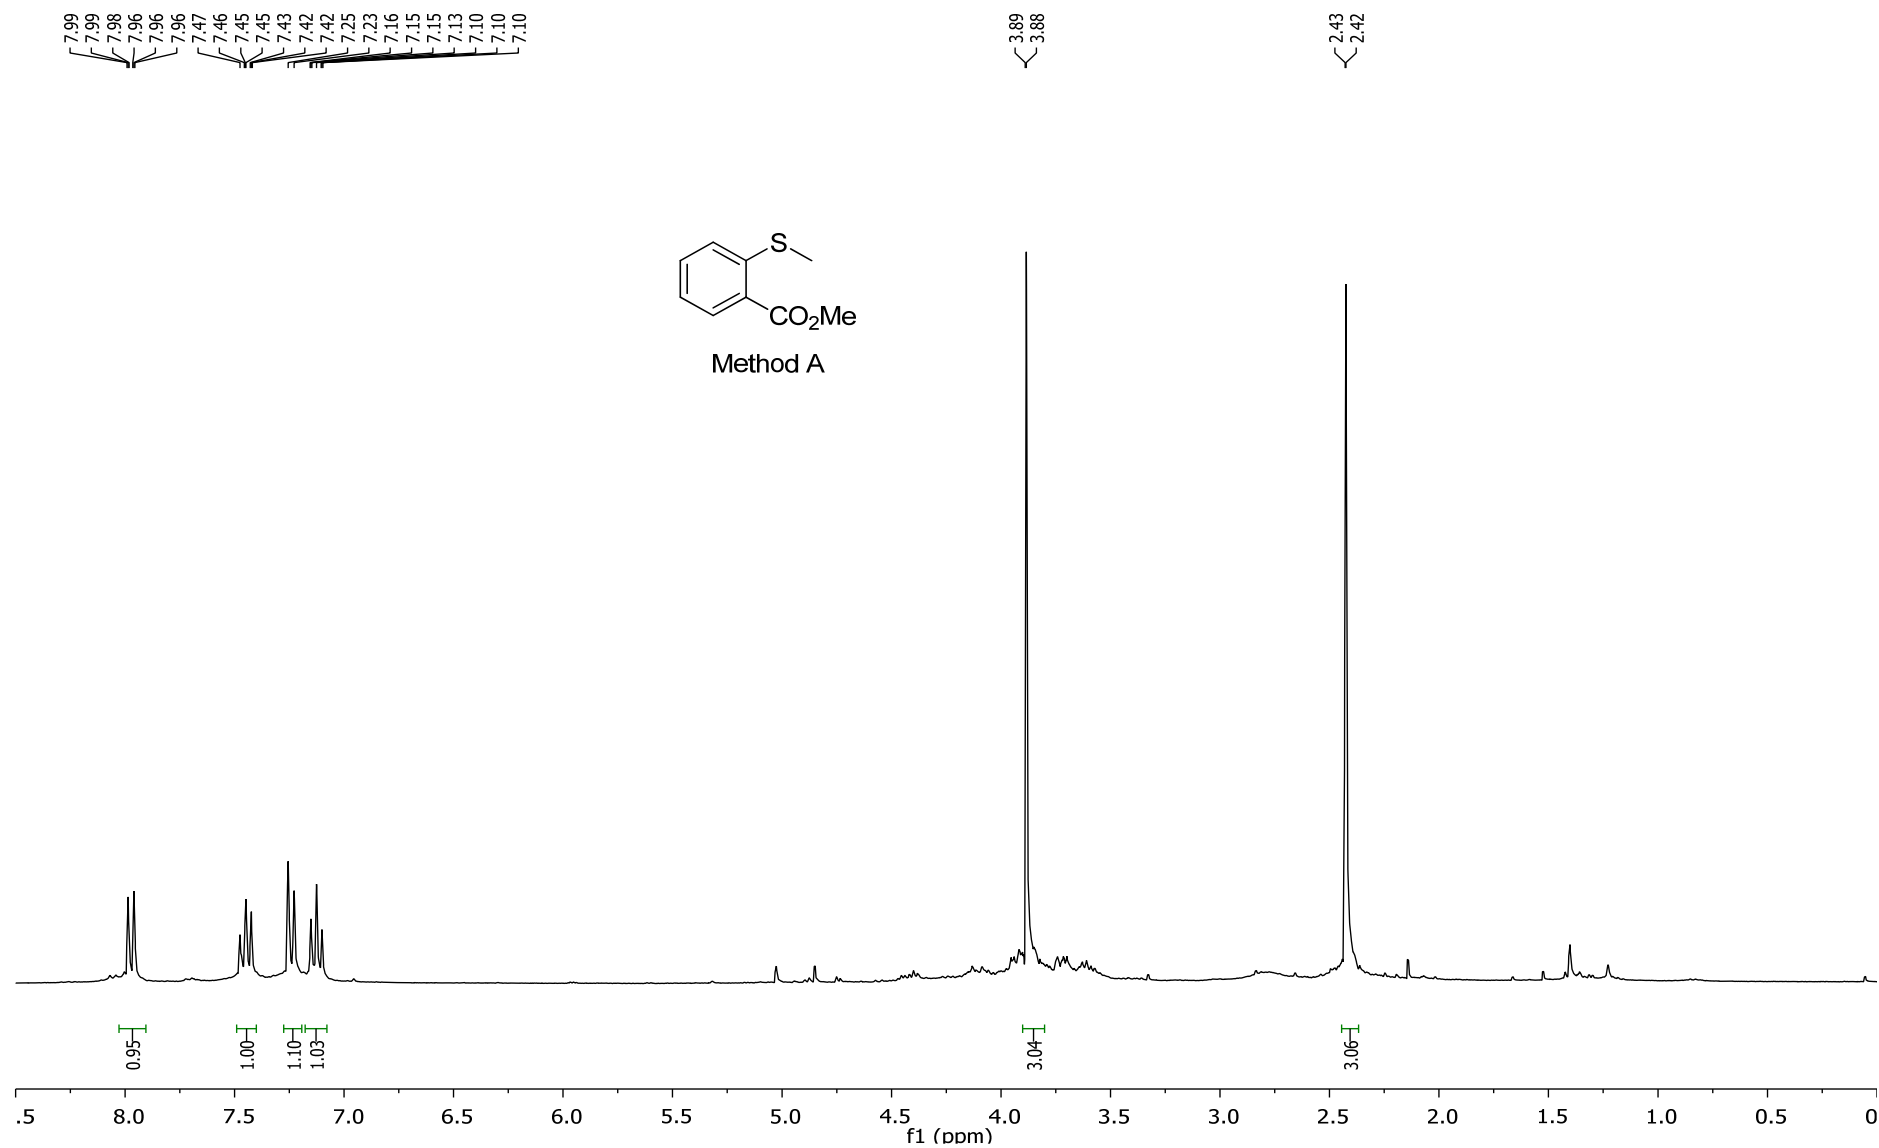

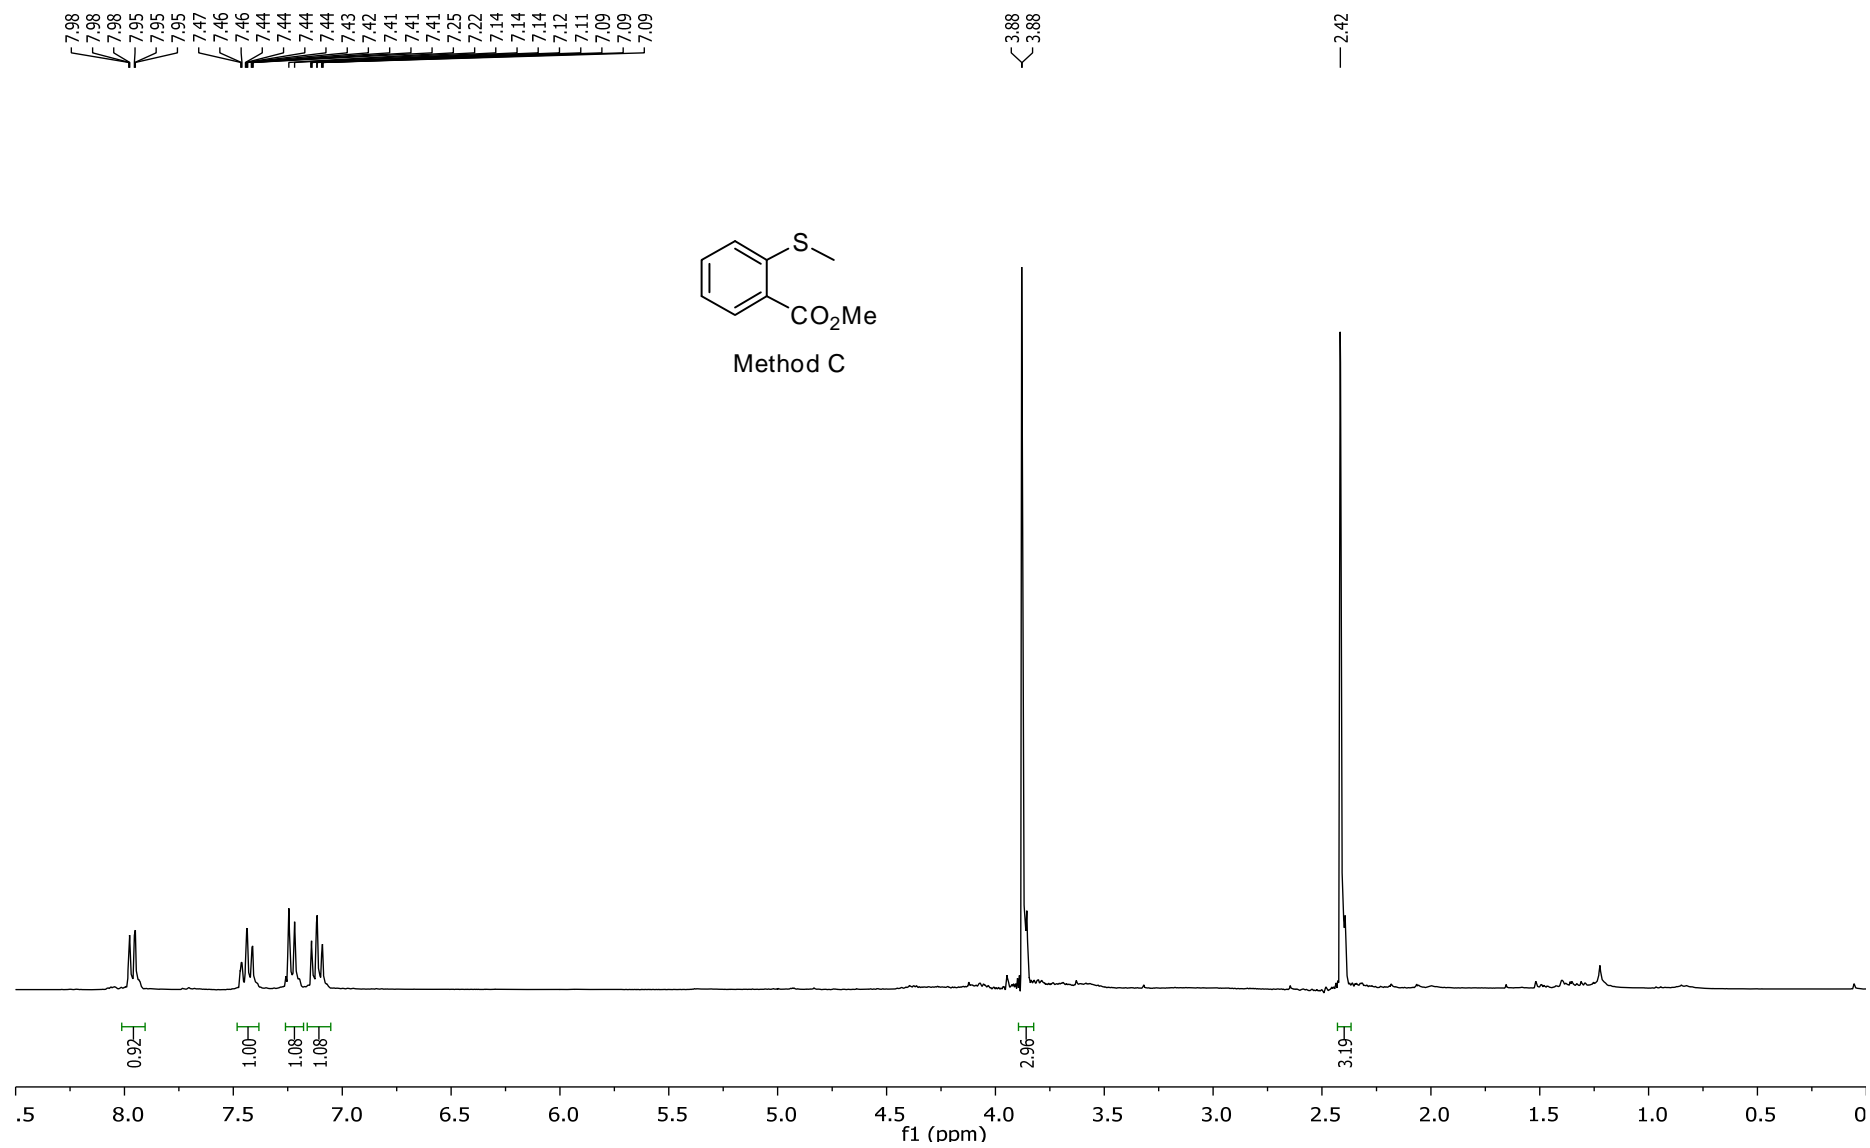

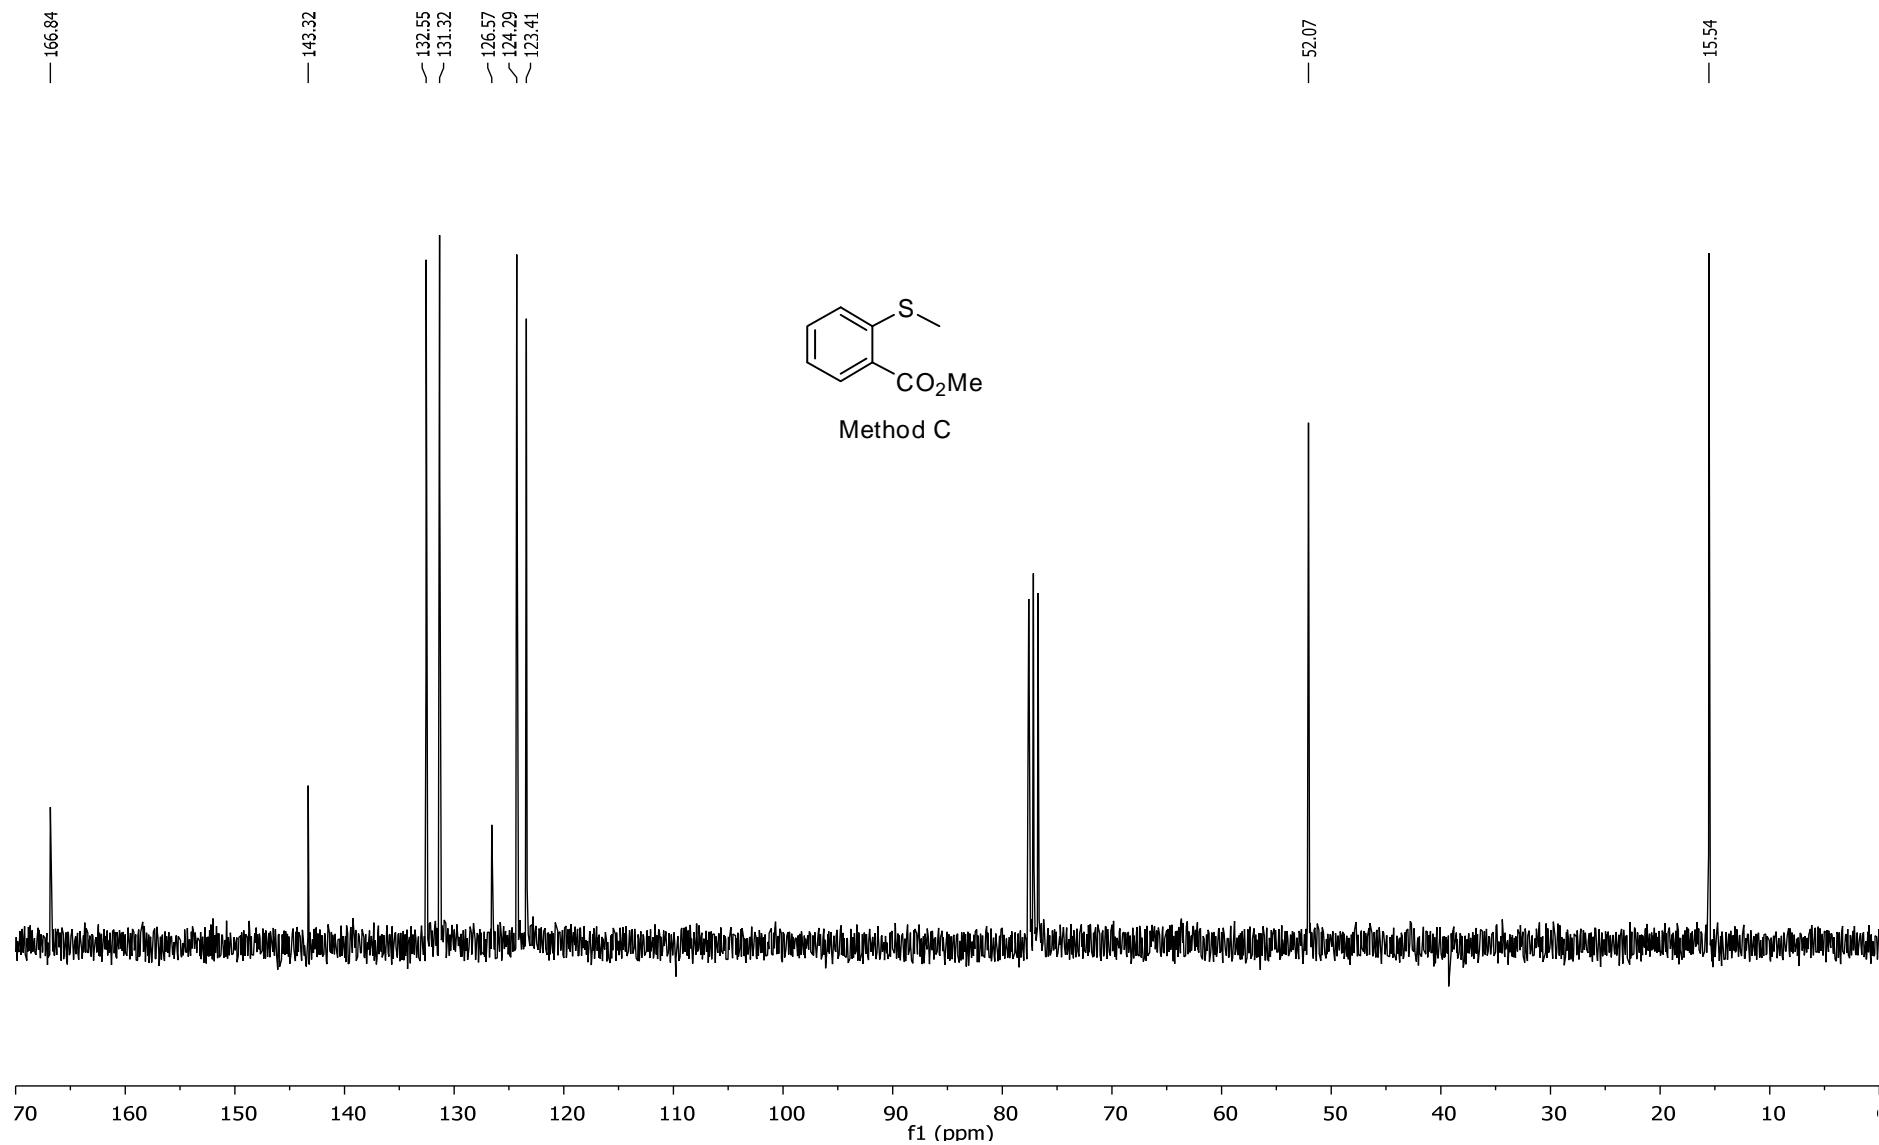

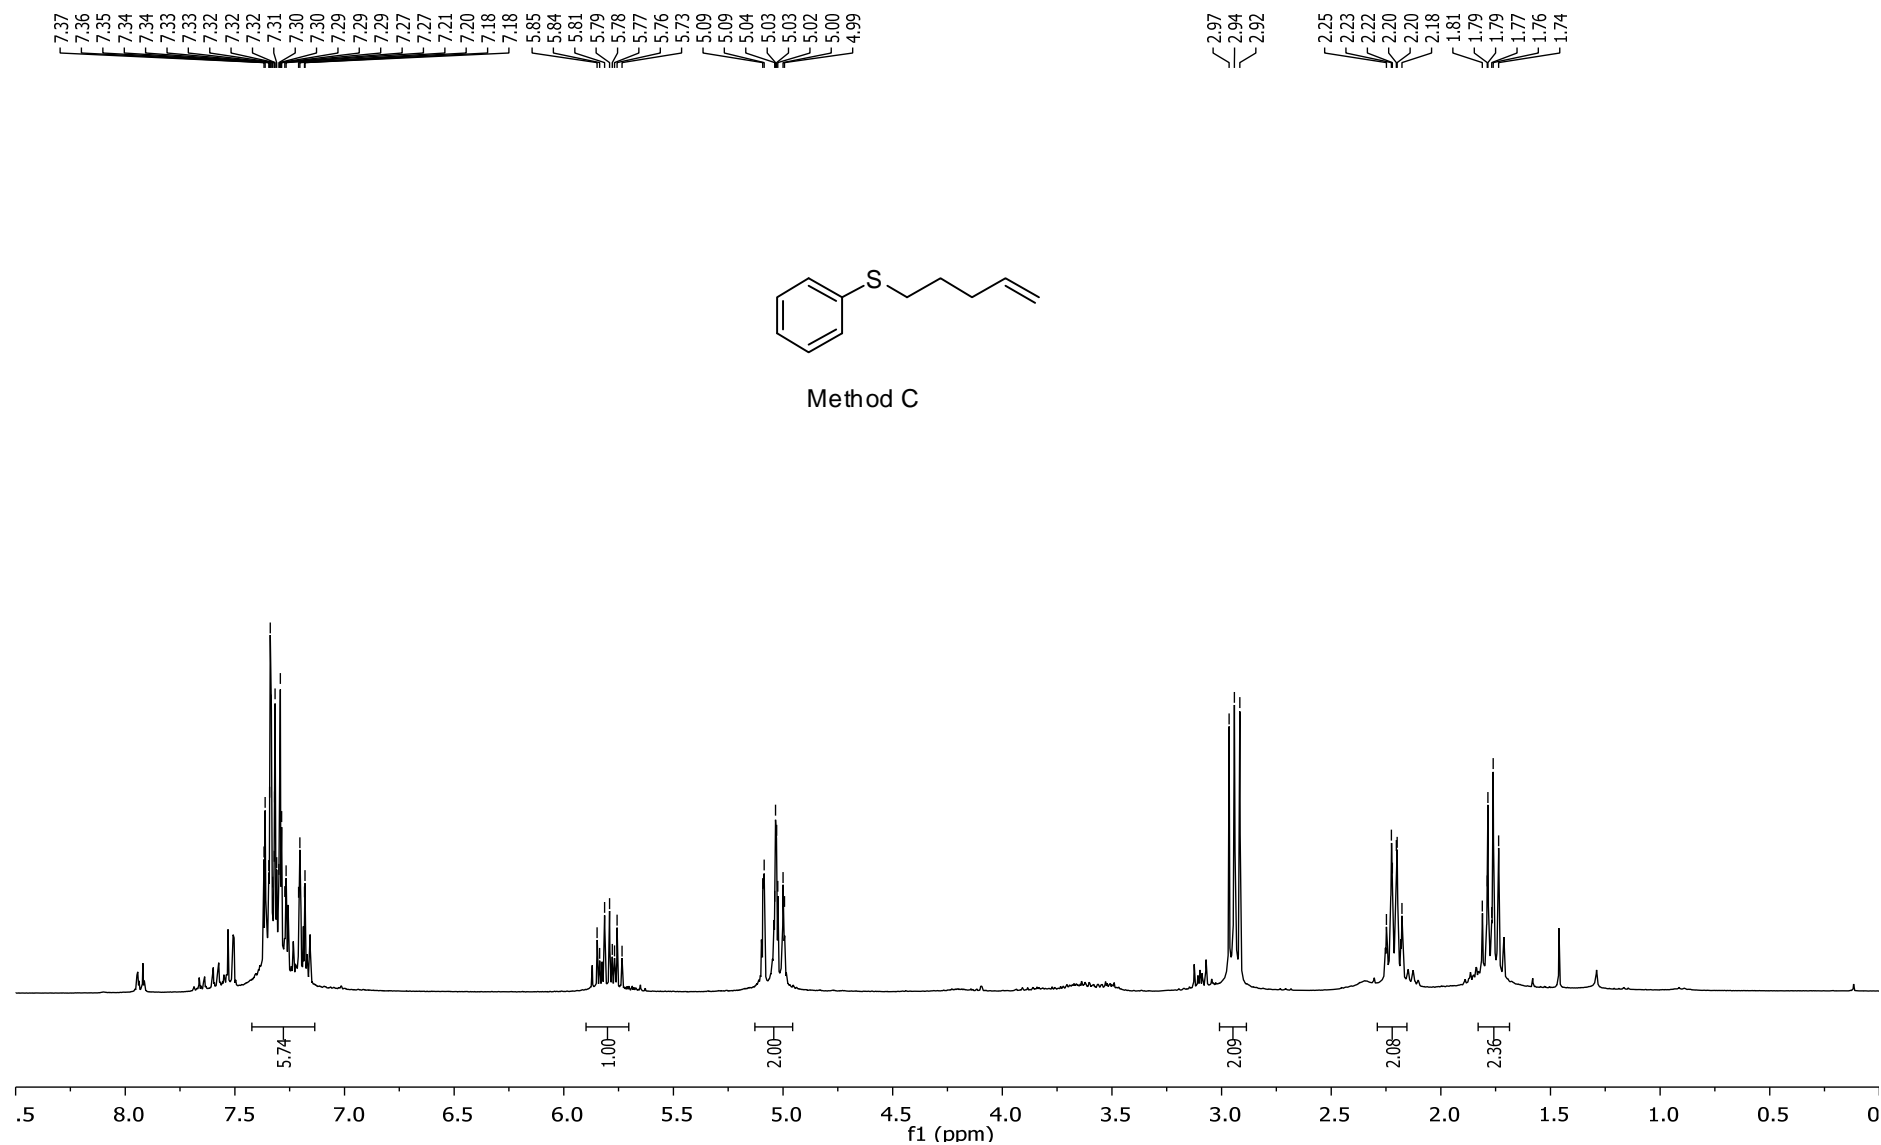

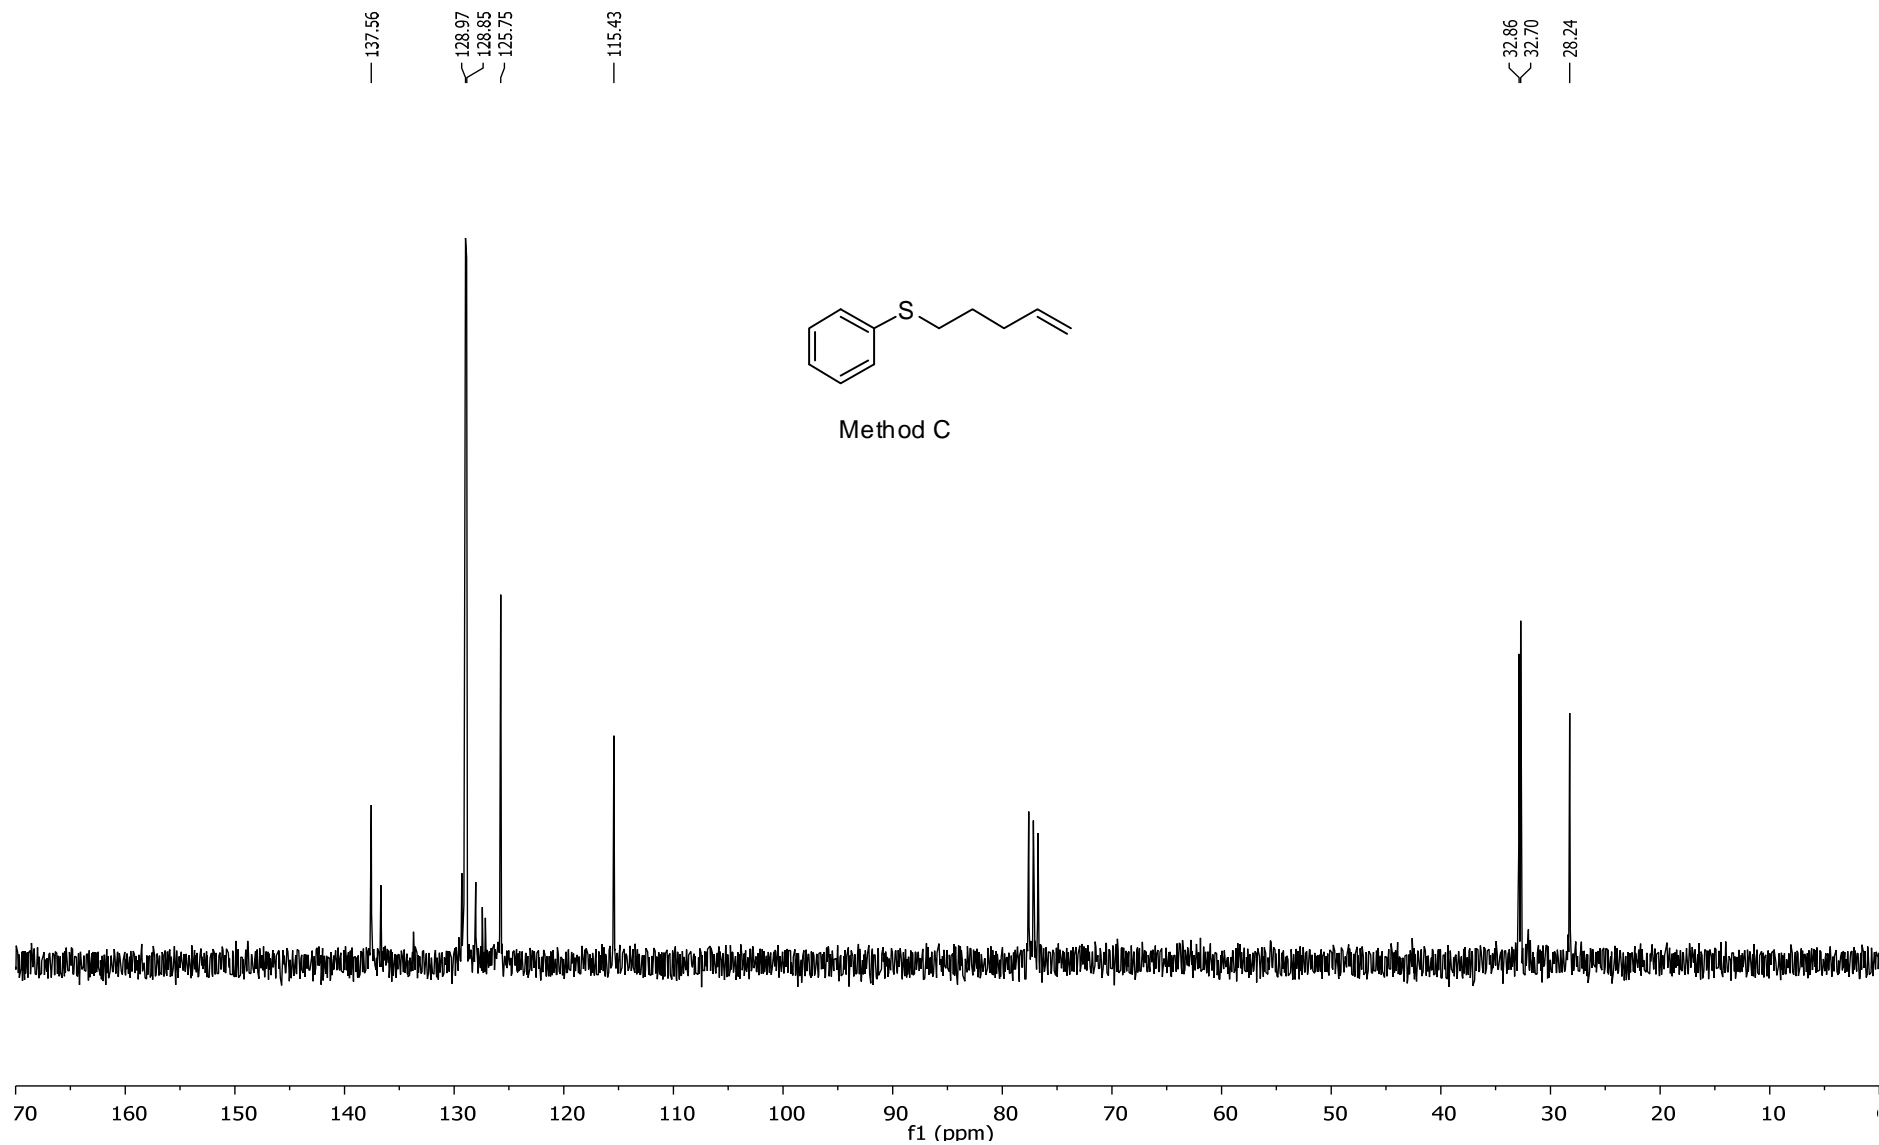

7.38  
7.37  
7.37  
7.36  
7.35  
7.35  
7.34  
7.34  
7.33  
7.32  
7.32  
7.31  
7.31  
7.30  
7.29  
7.29  
7.29  
7.28  
7.28  
7.27  
7.26  
7.26  
7.26  
7.21  
7.21  
7.20  
7.19  
7.19  
7.18

3.07  
3.04  
3.02  
2.38  
2.37  
2.36  
2.35  
2.33  
2.33  
2.01  
2.00  
1.99  
1.88  
1.85  
1.83

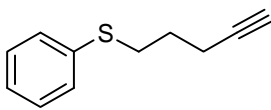

Method C

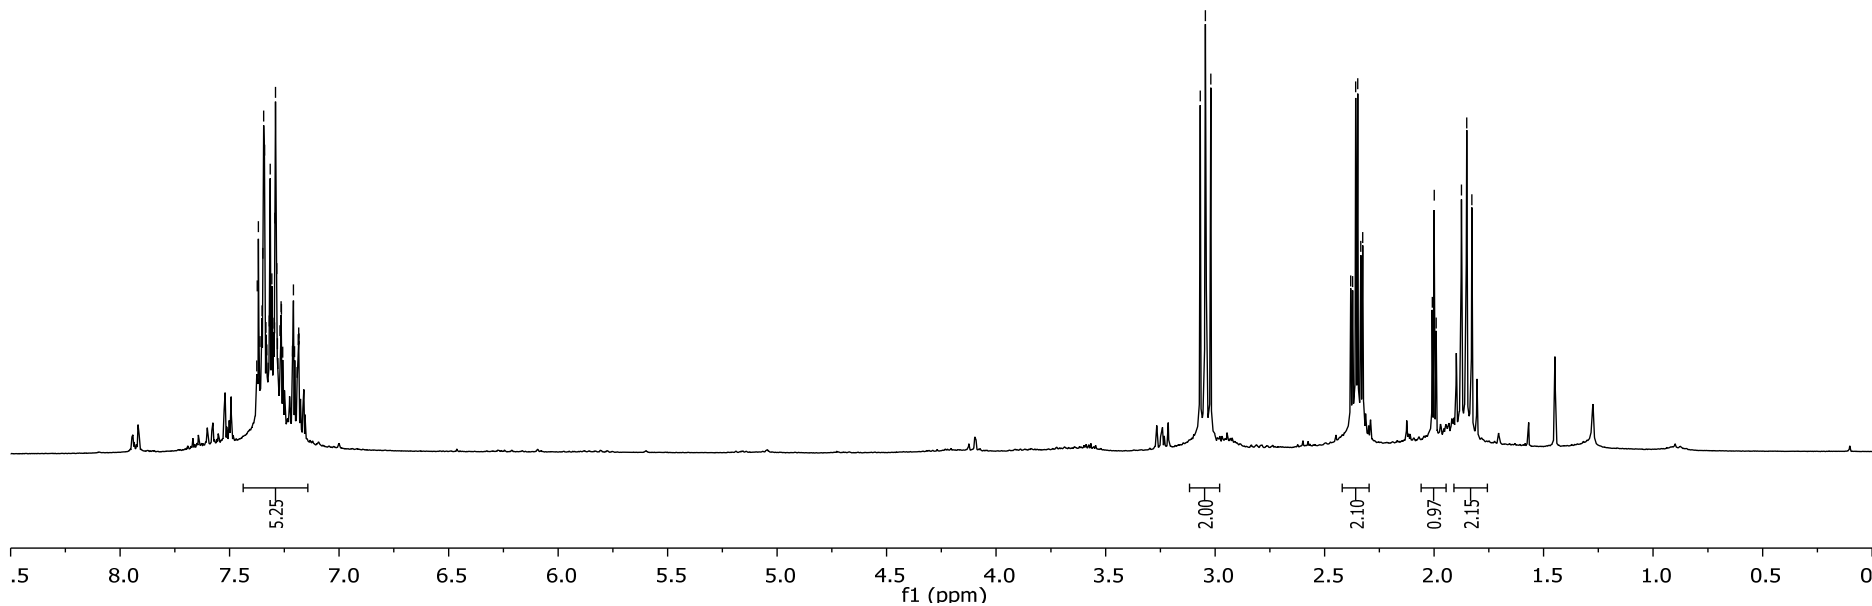

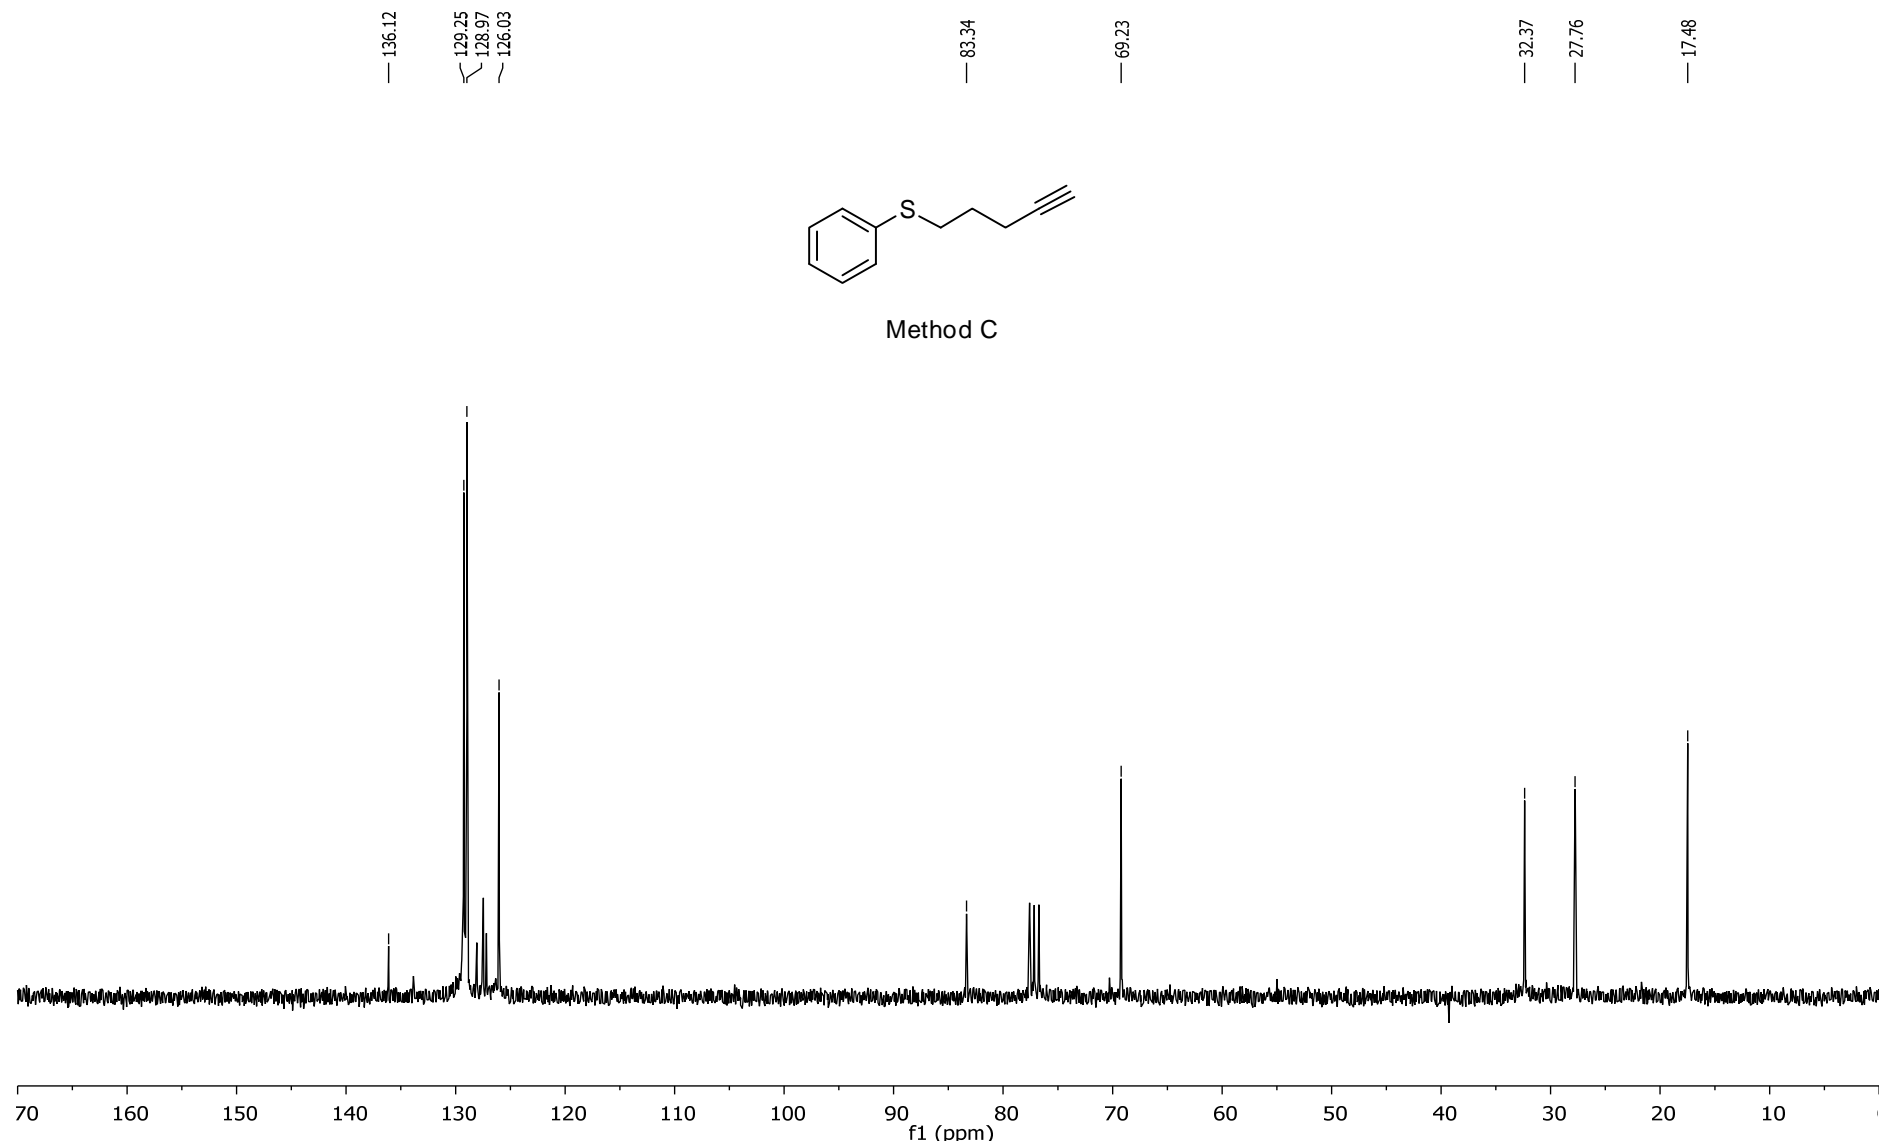



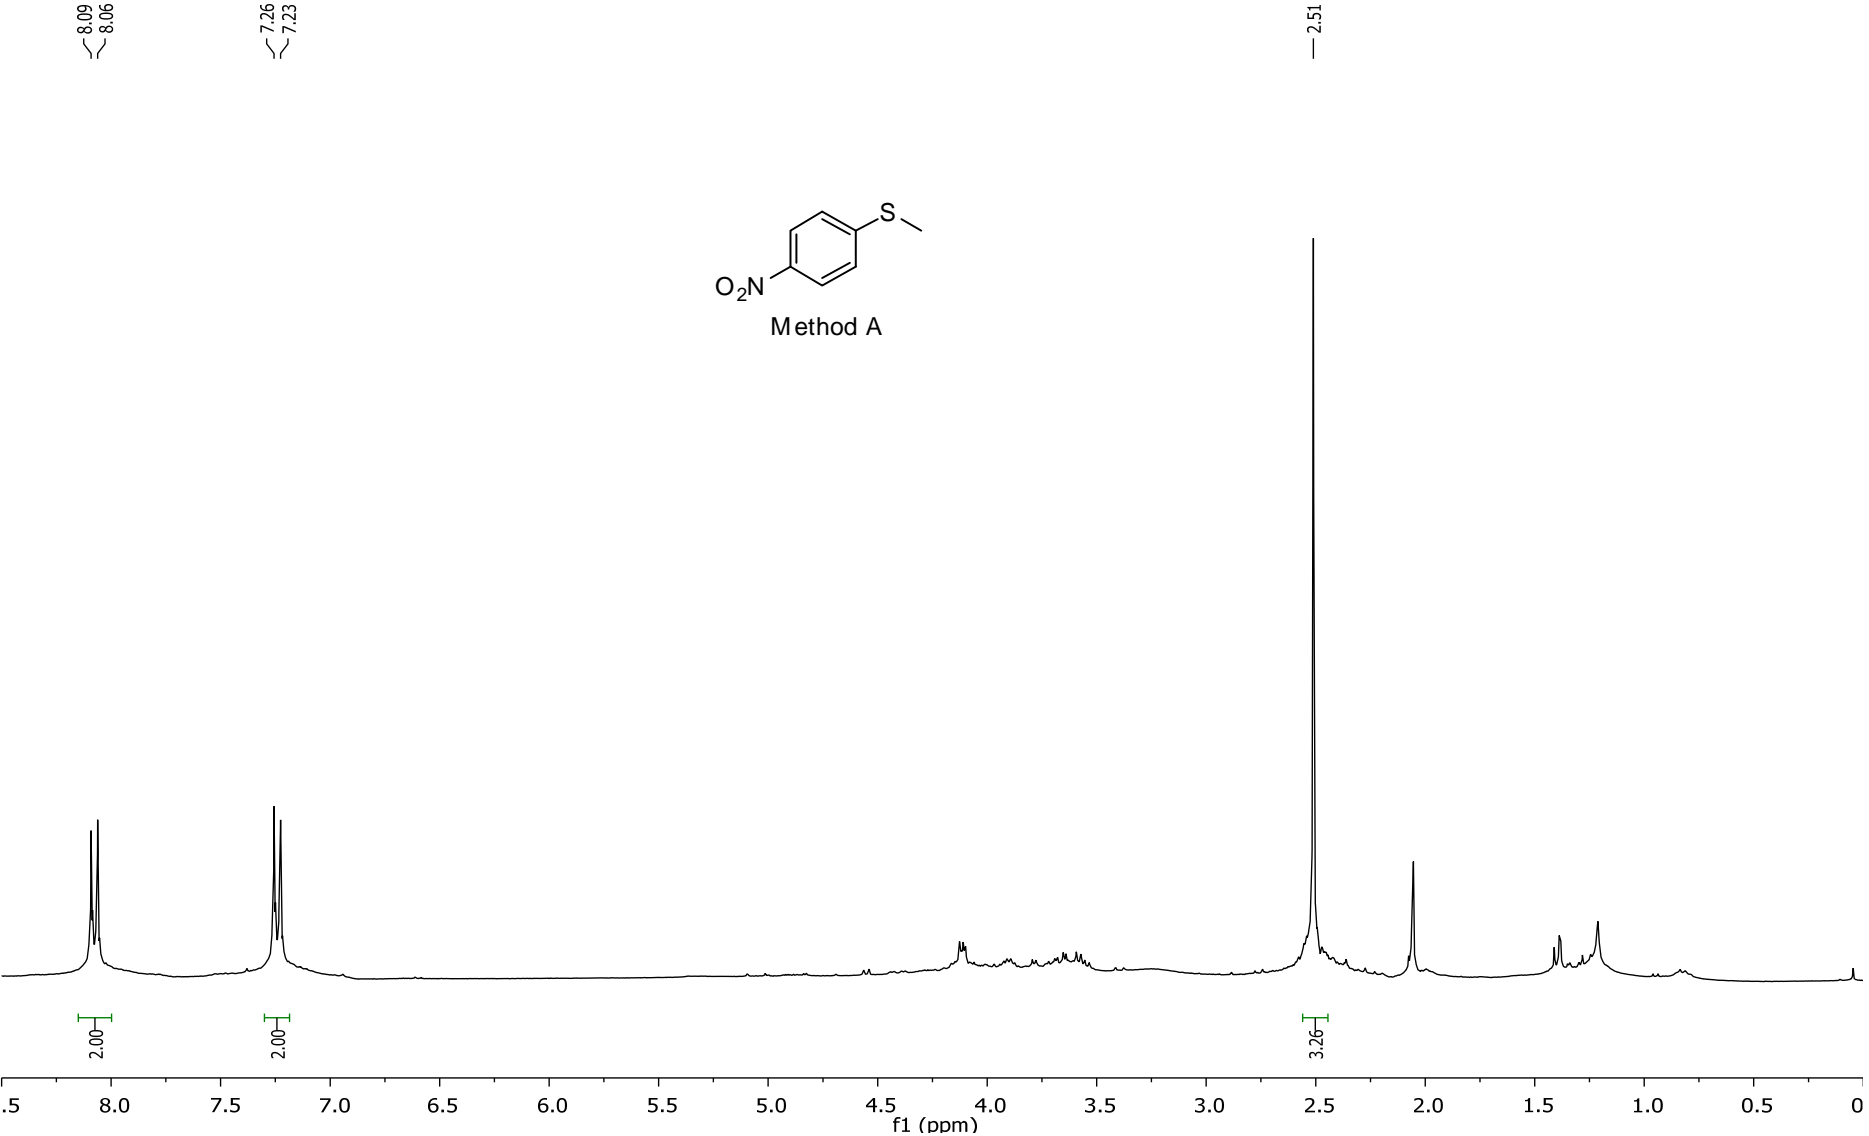

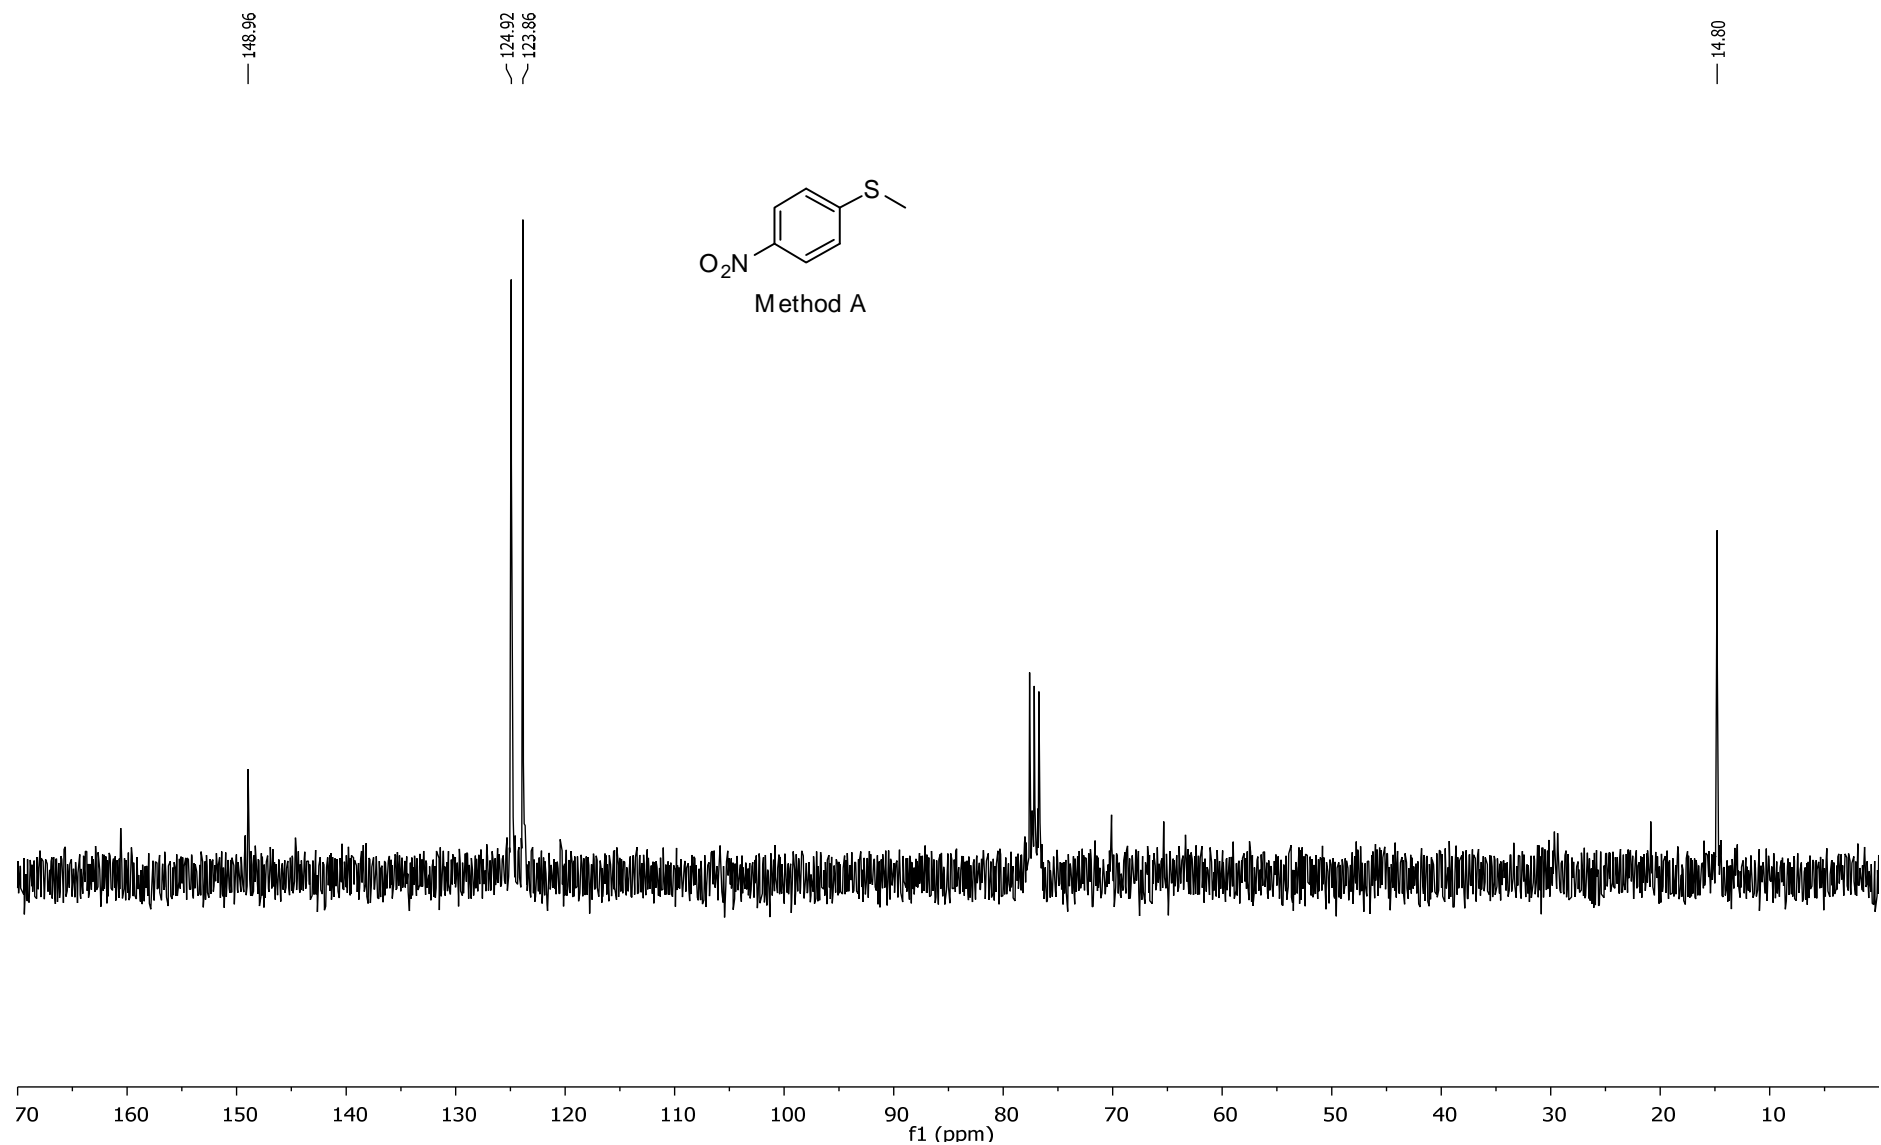

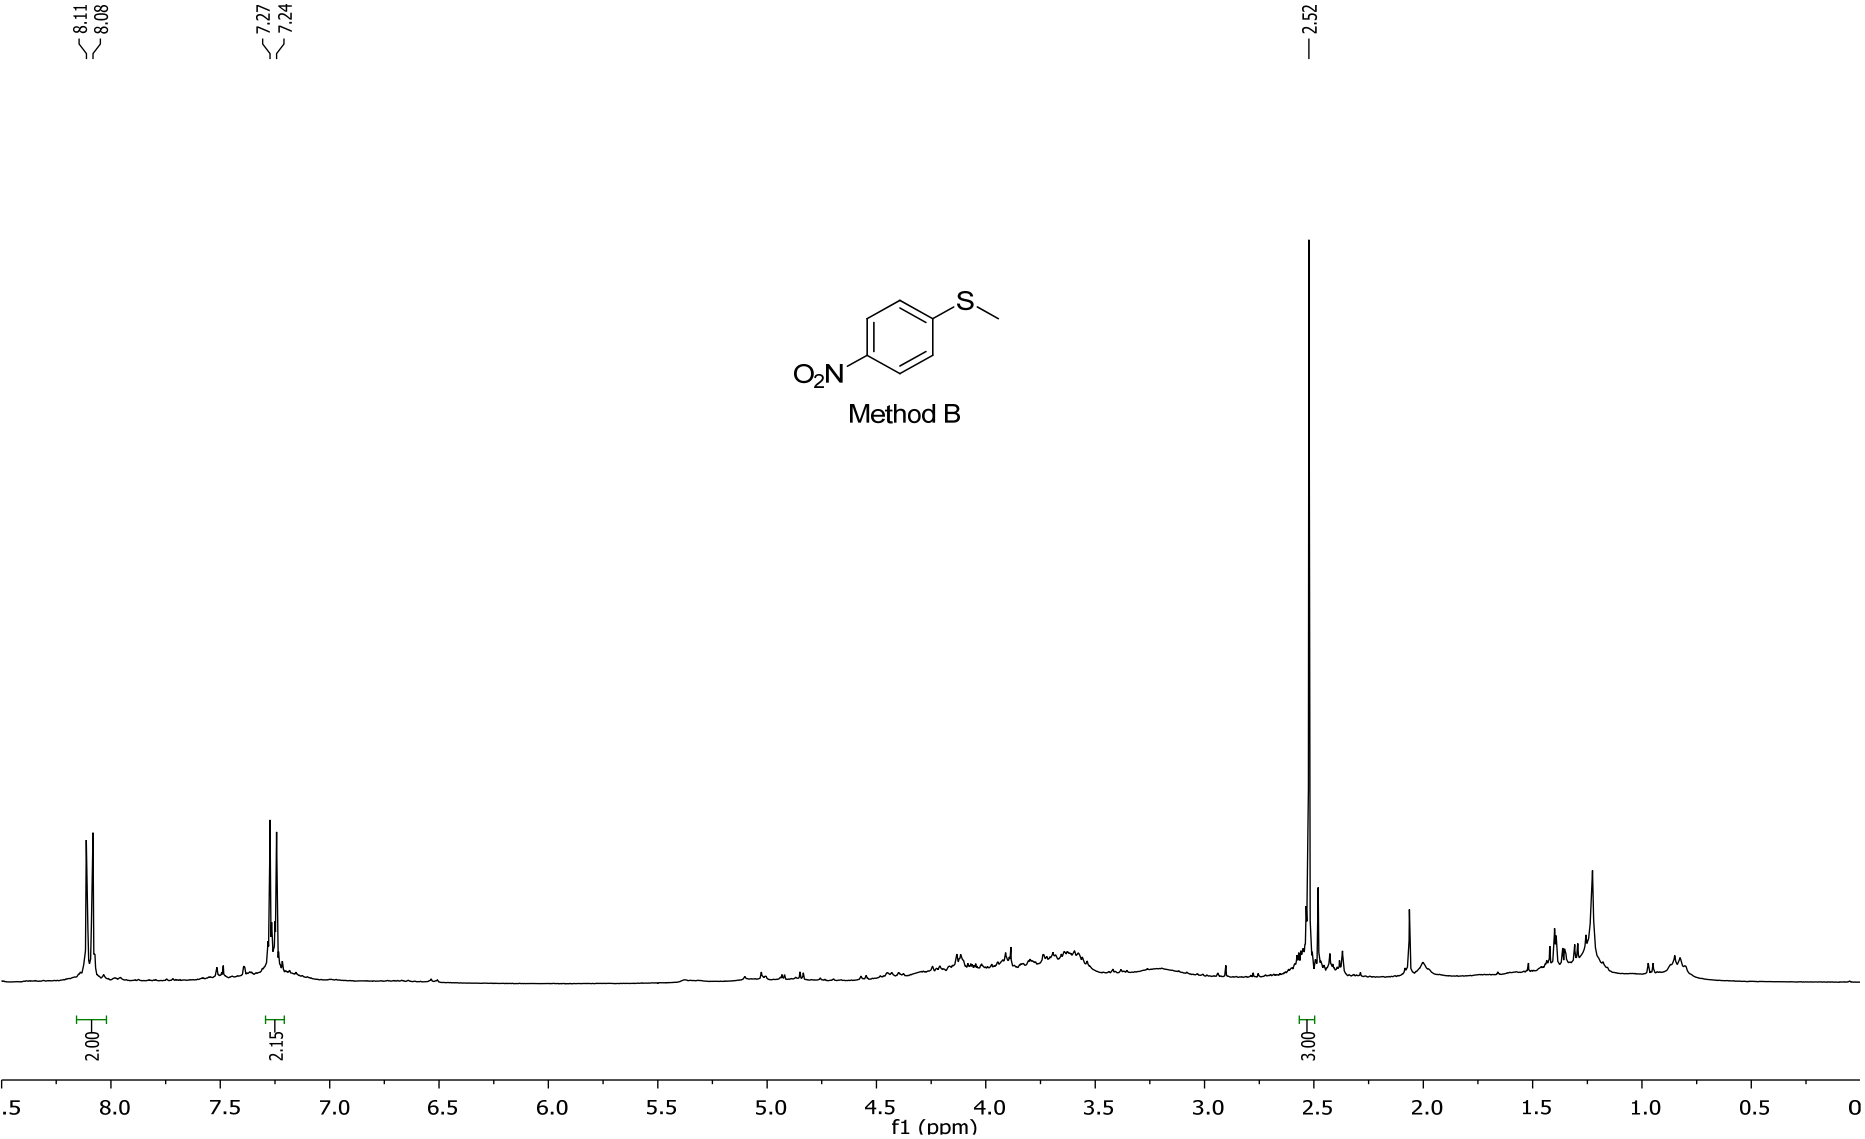

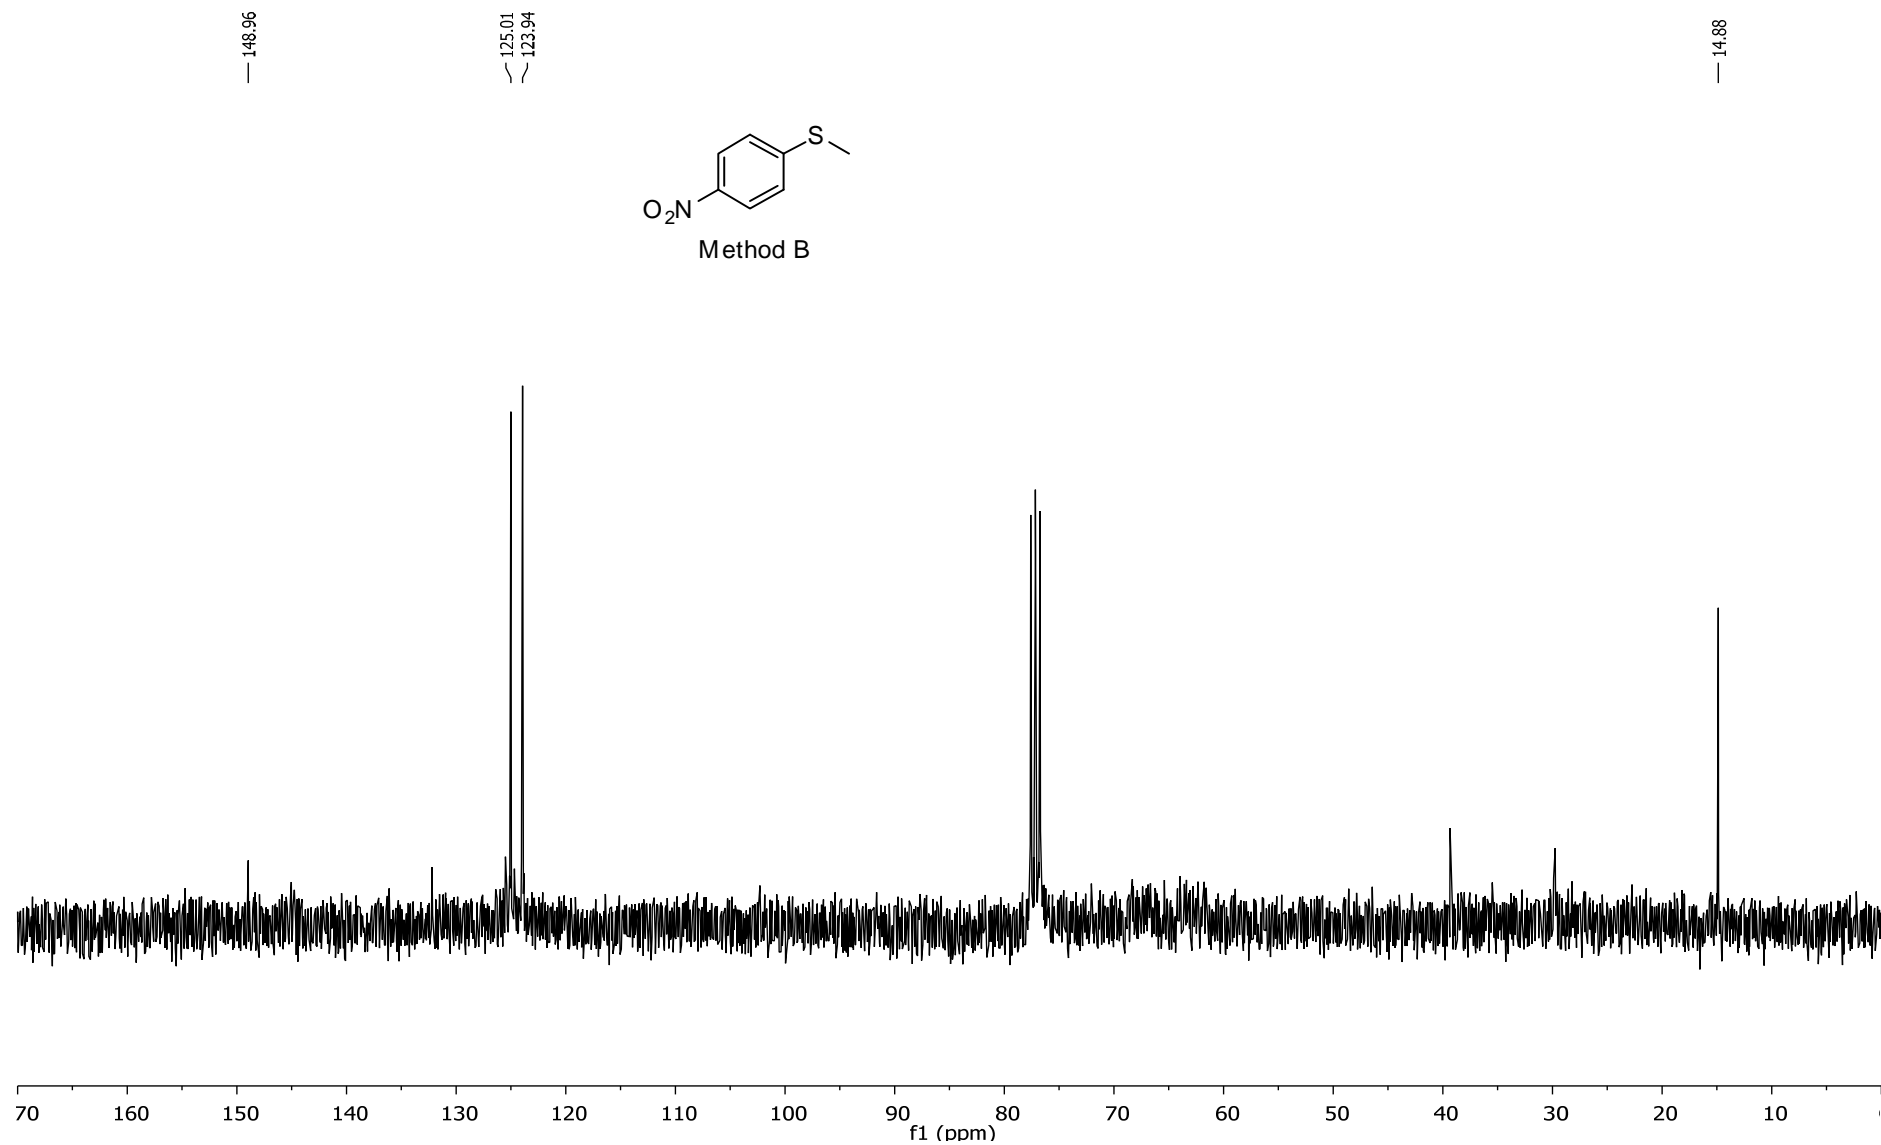

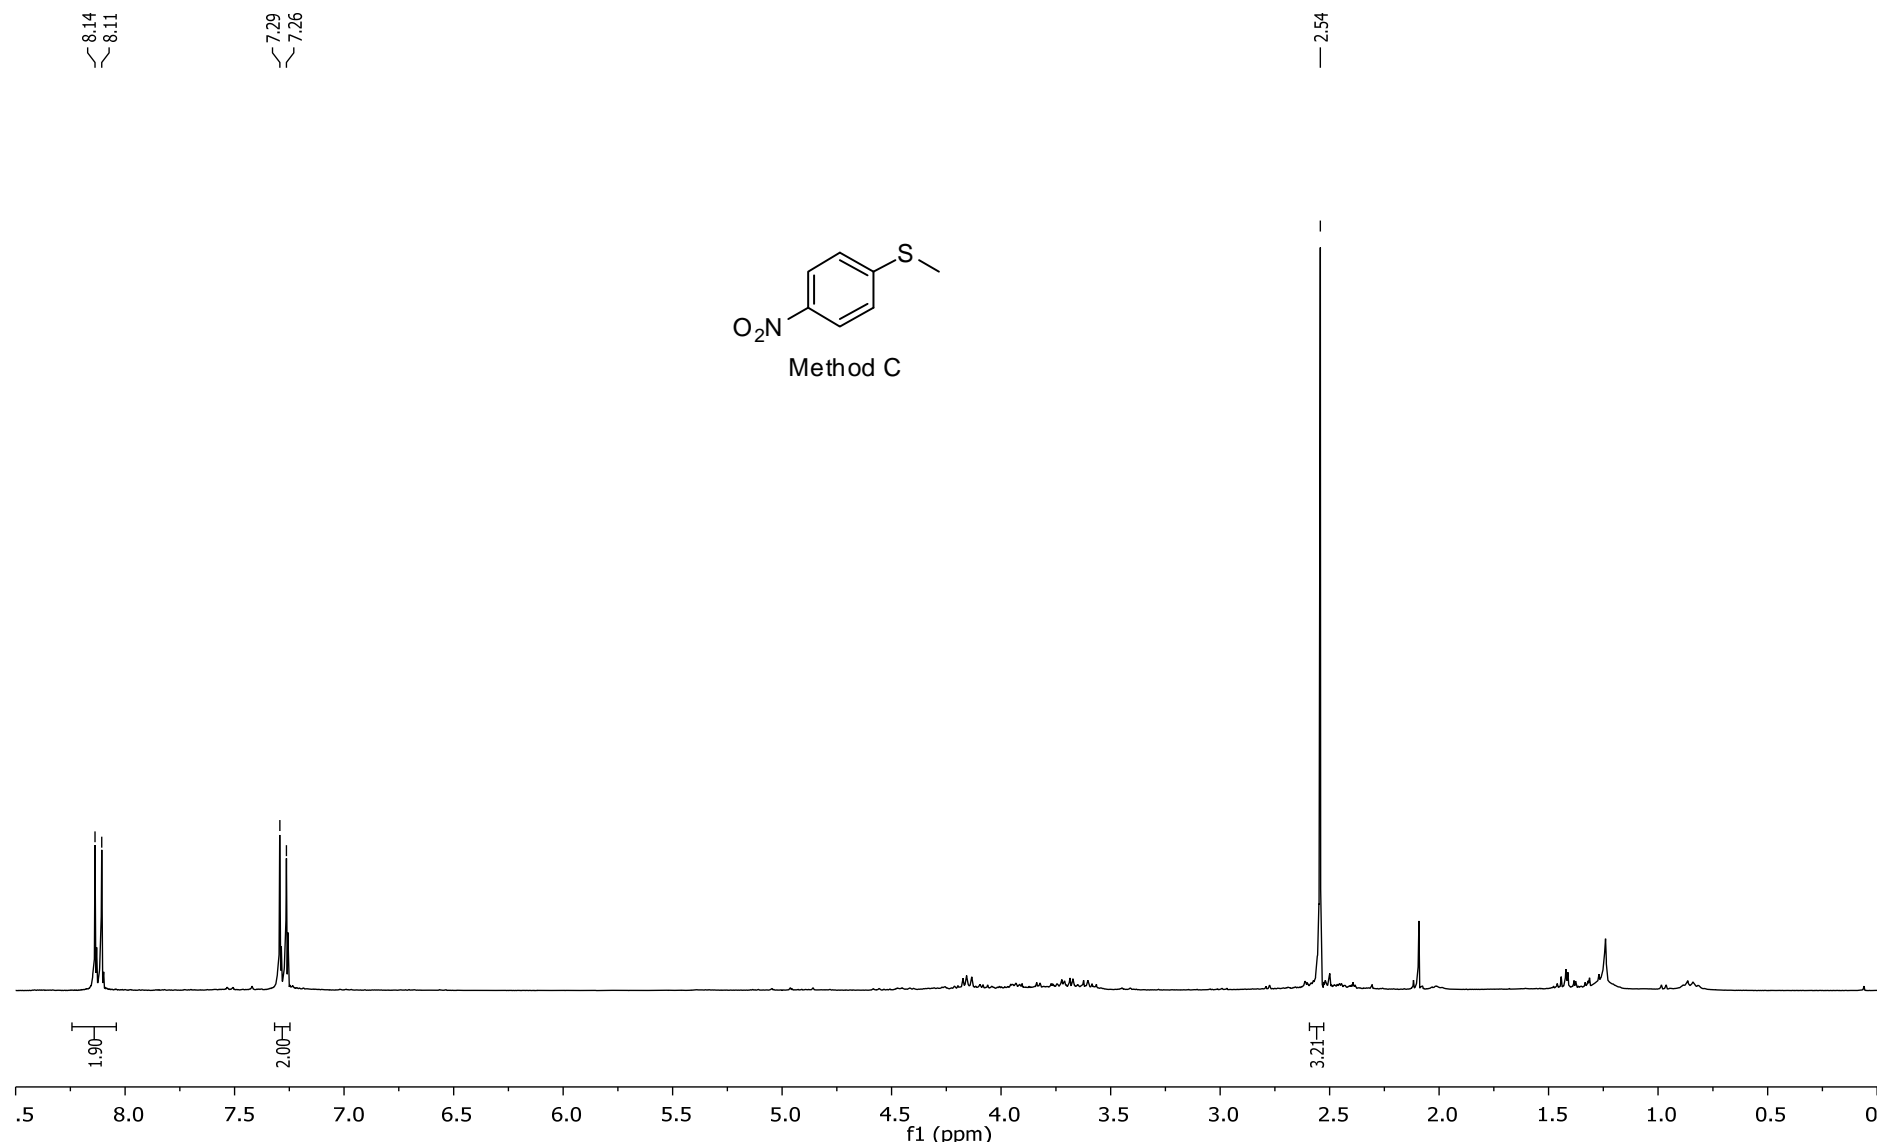

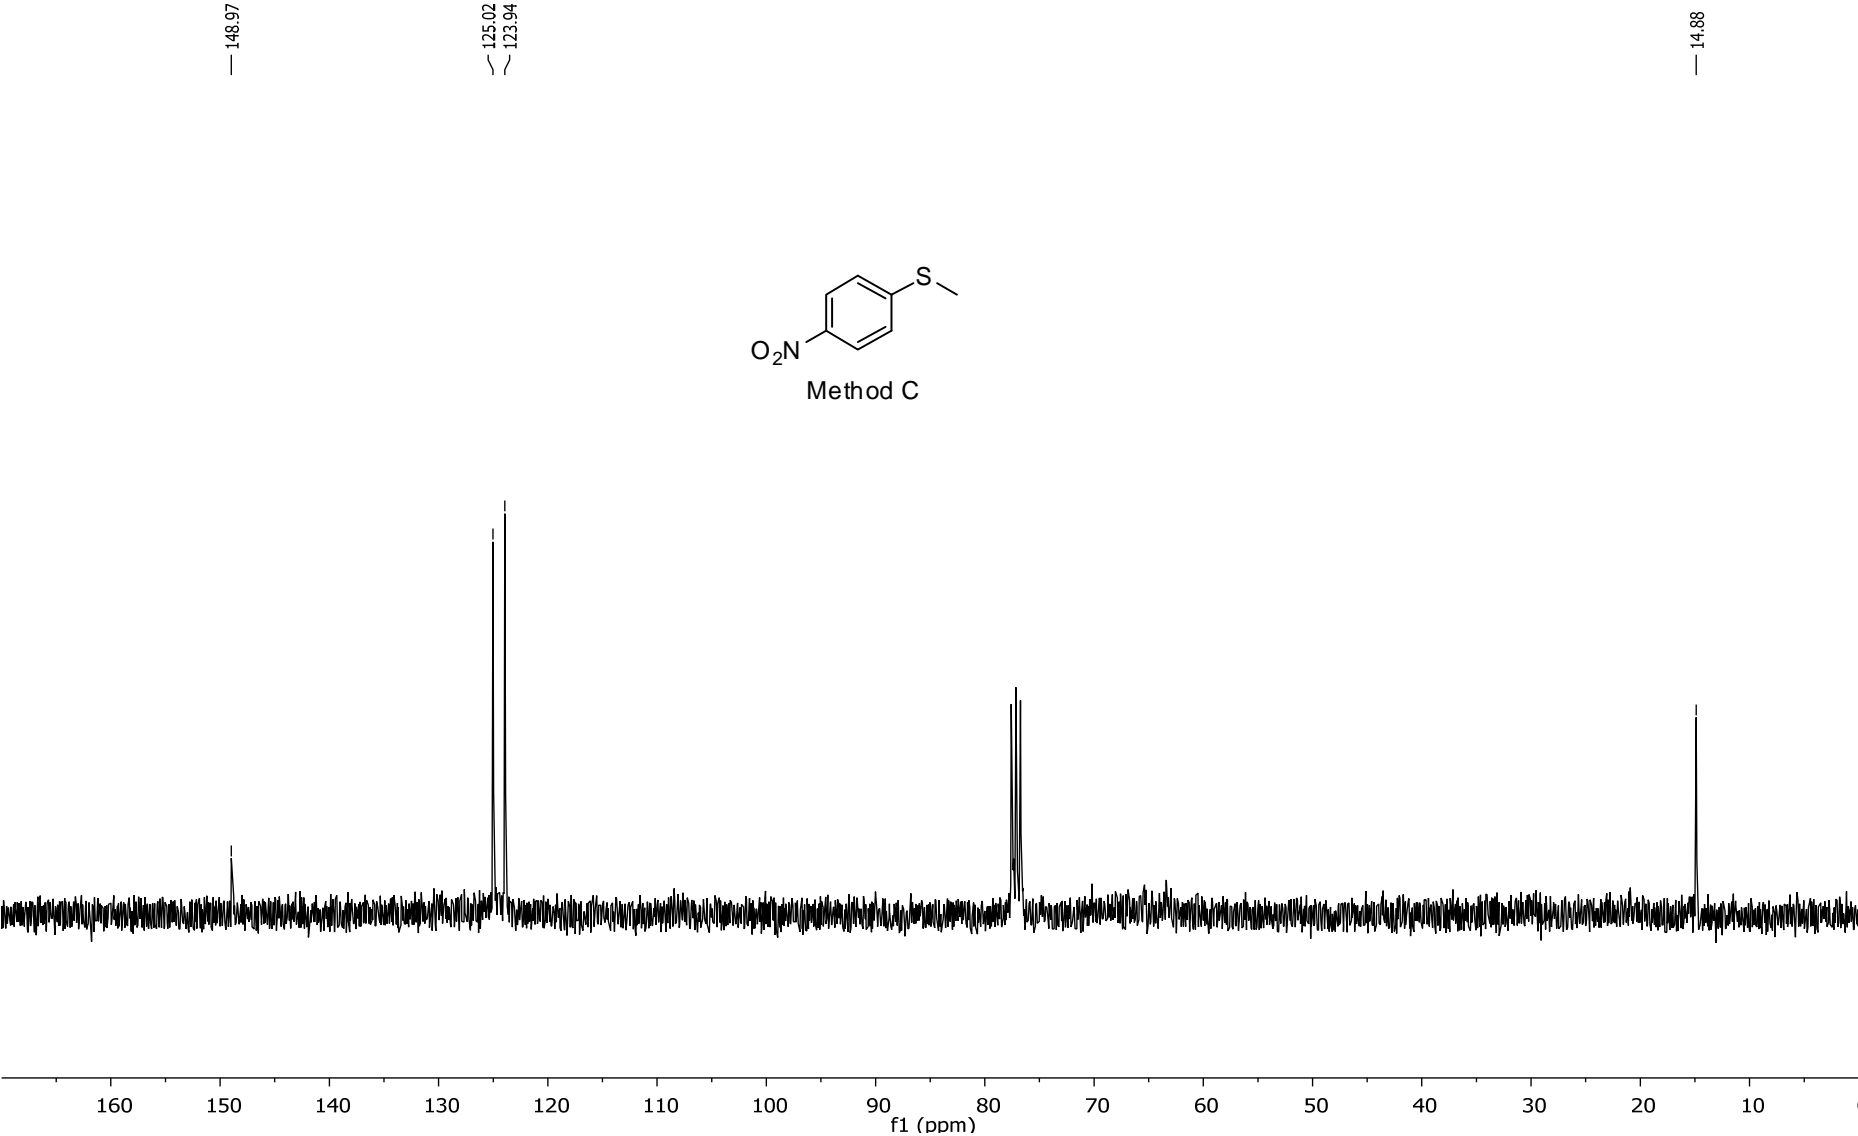

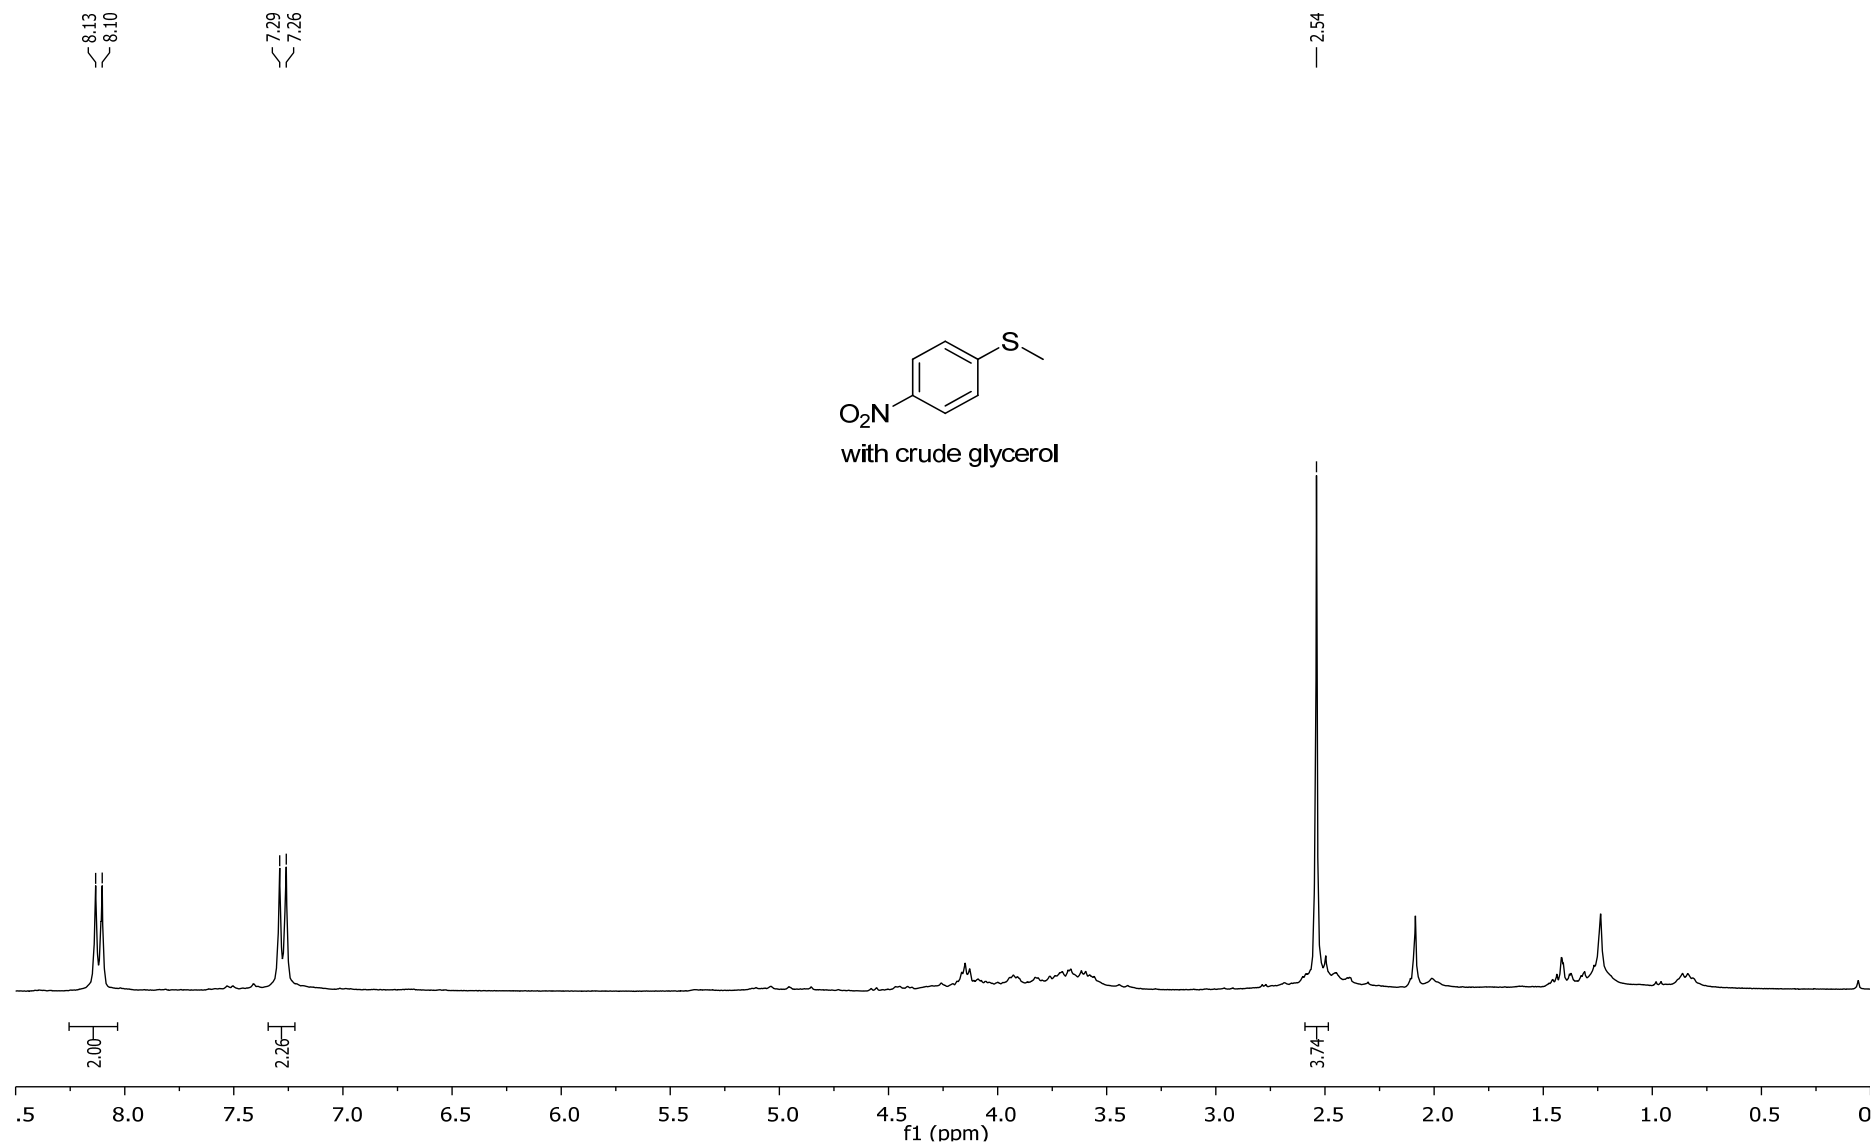

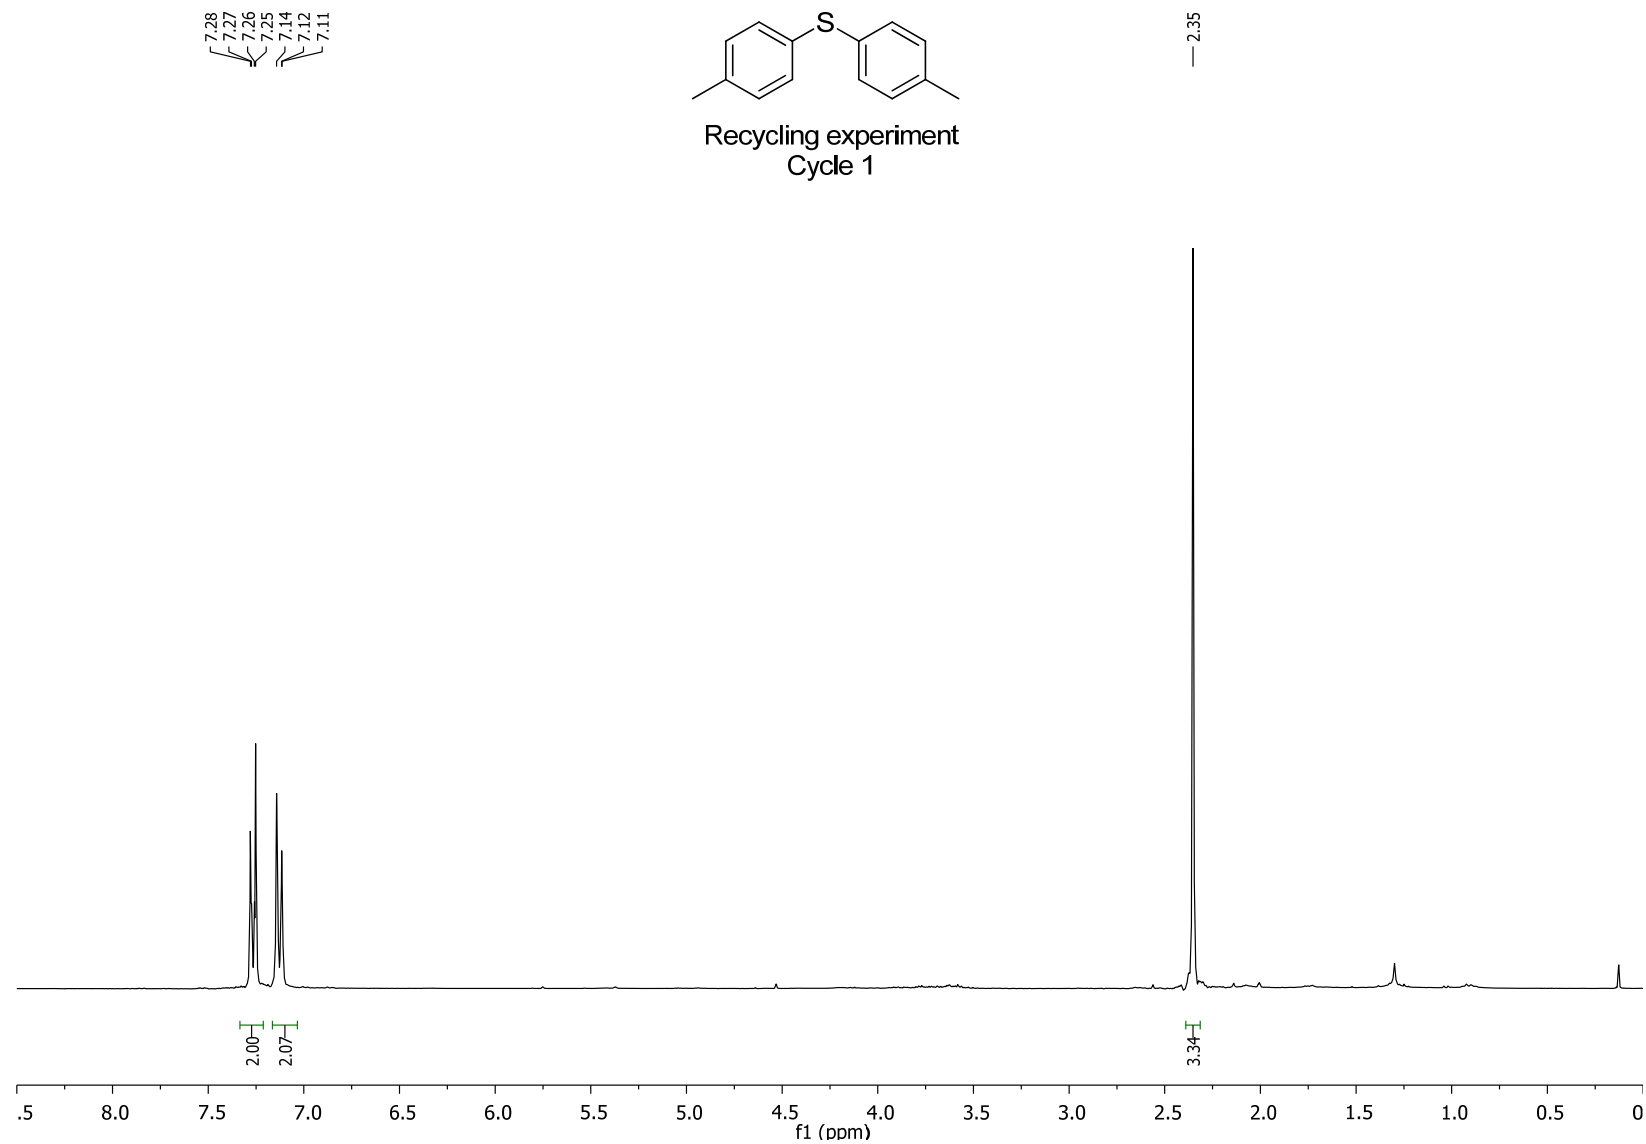



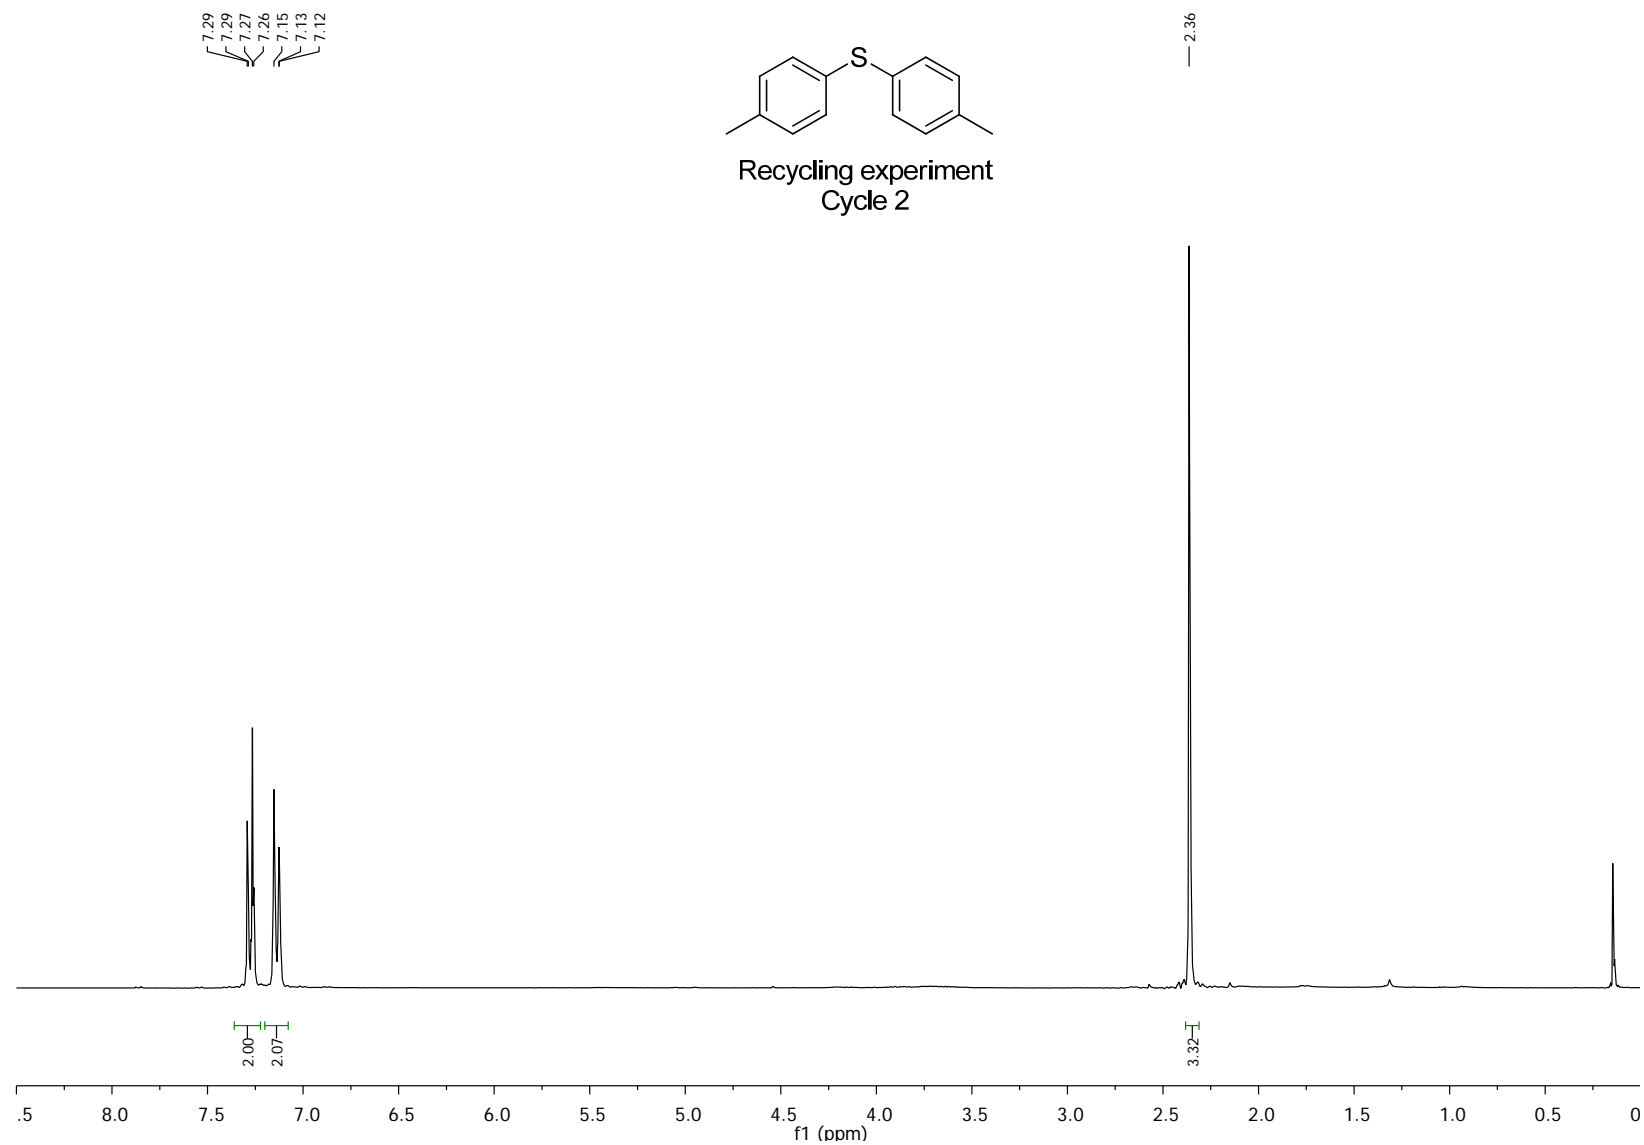

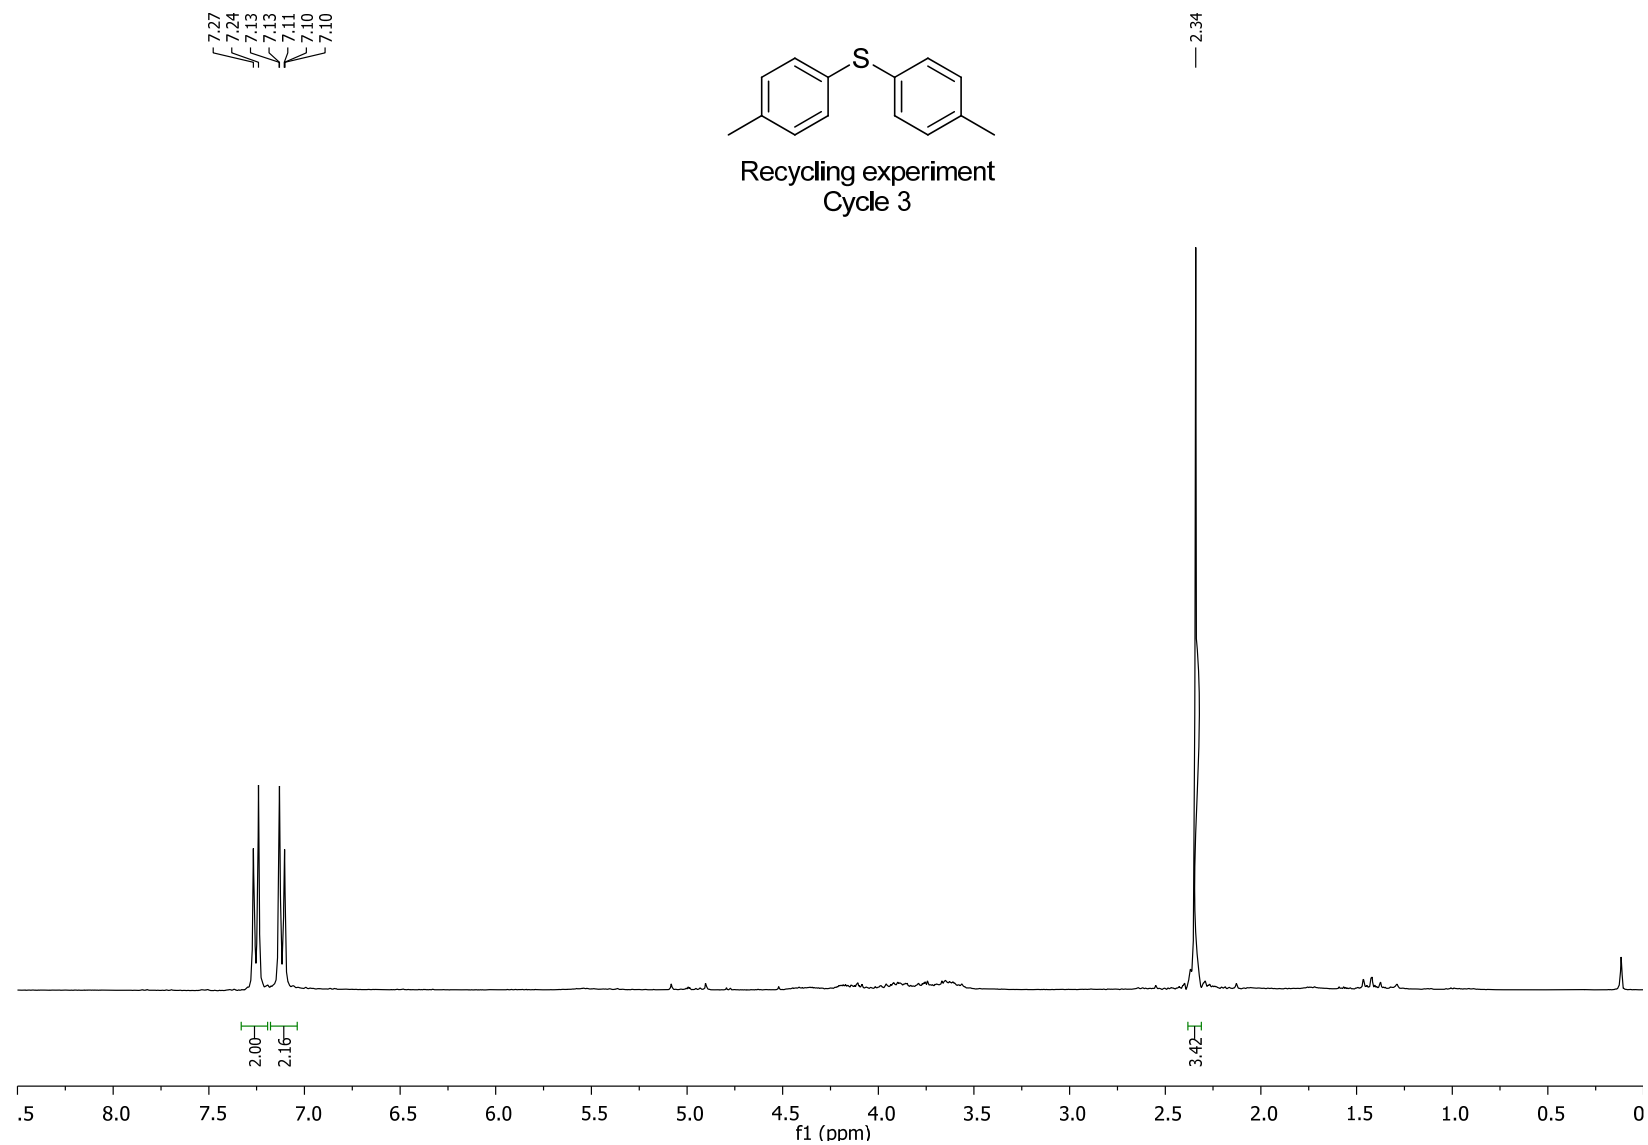

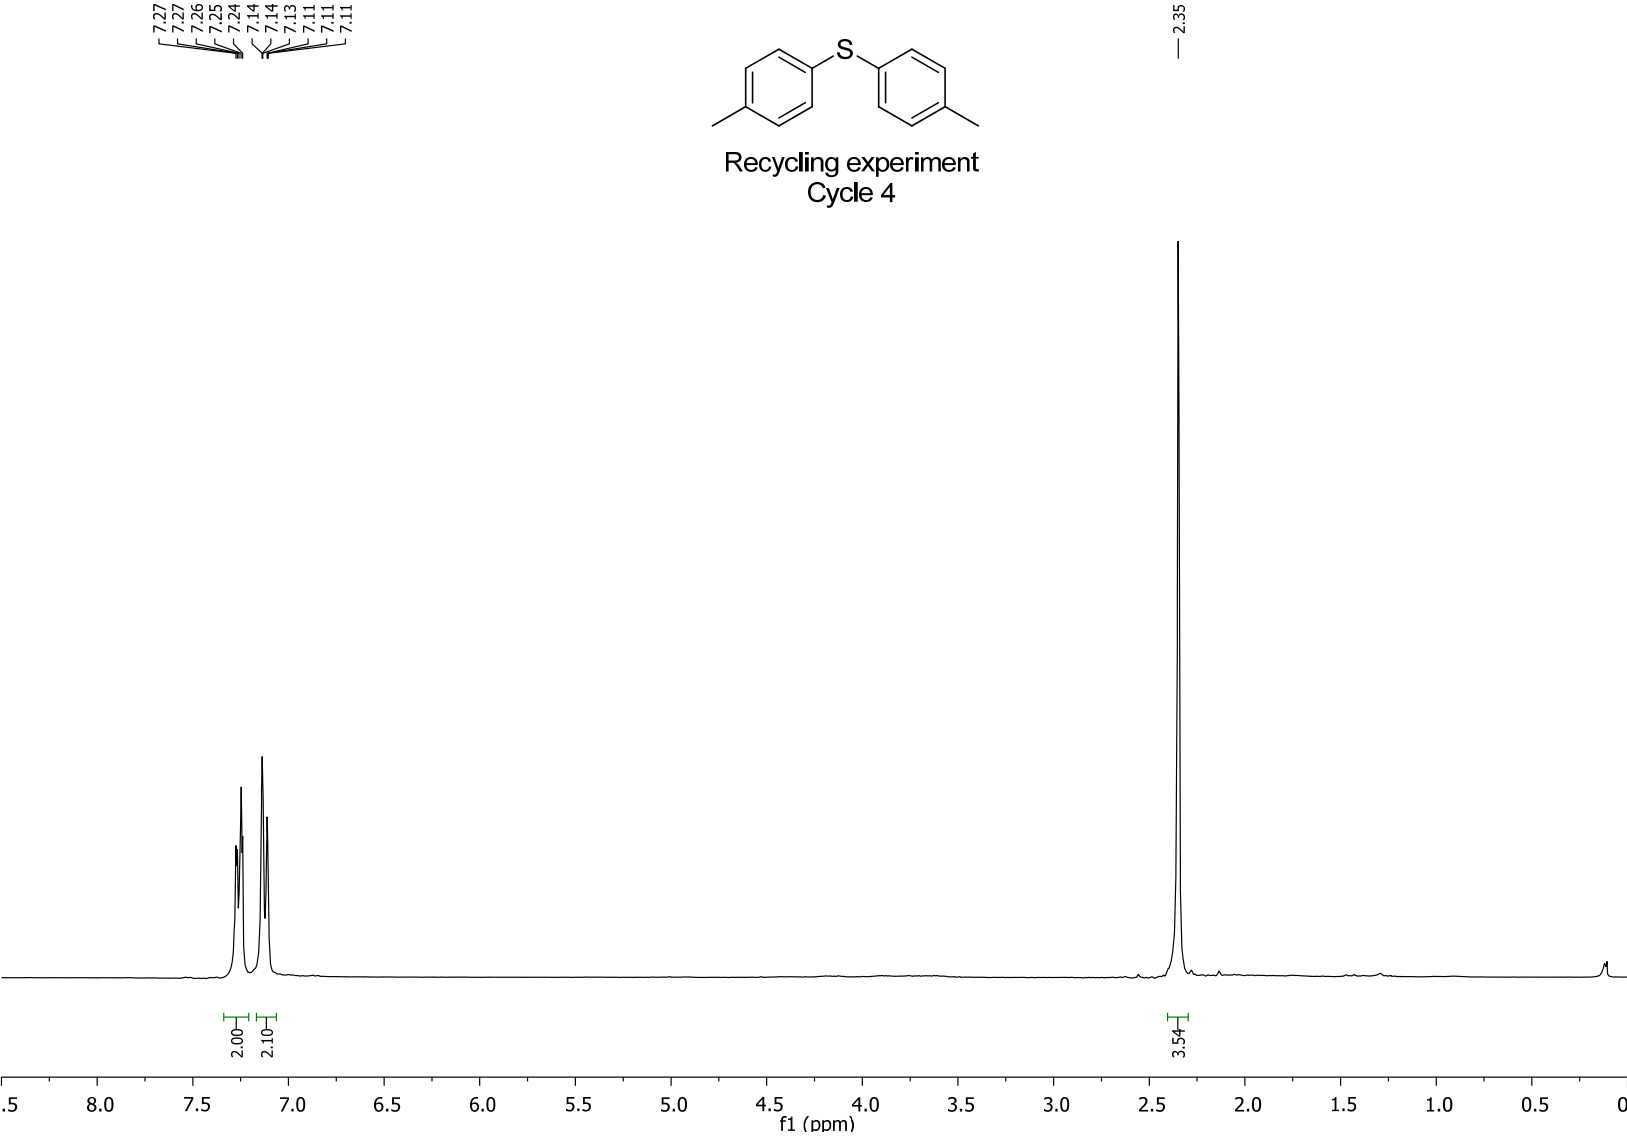

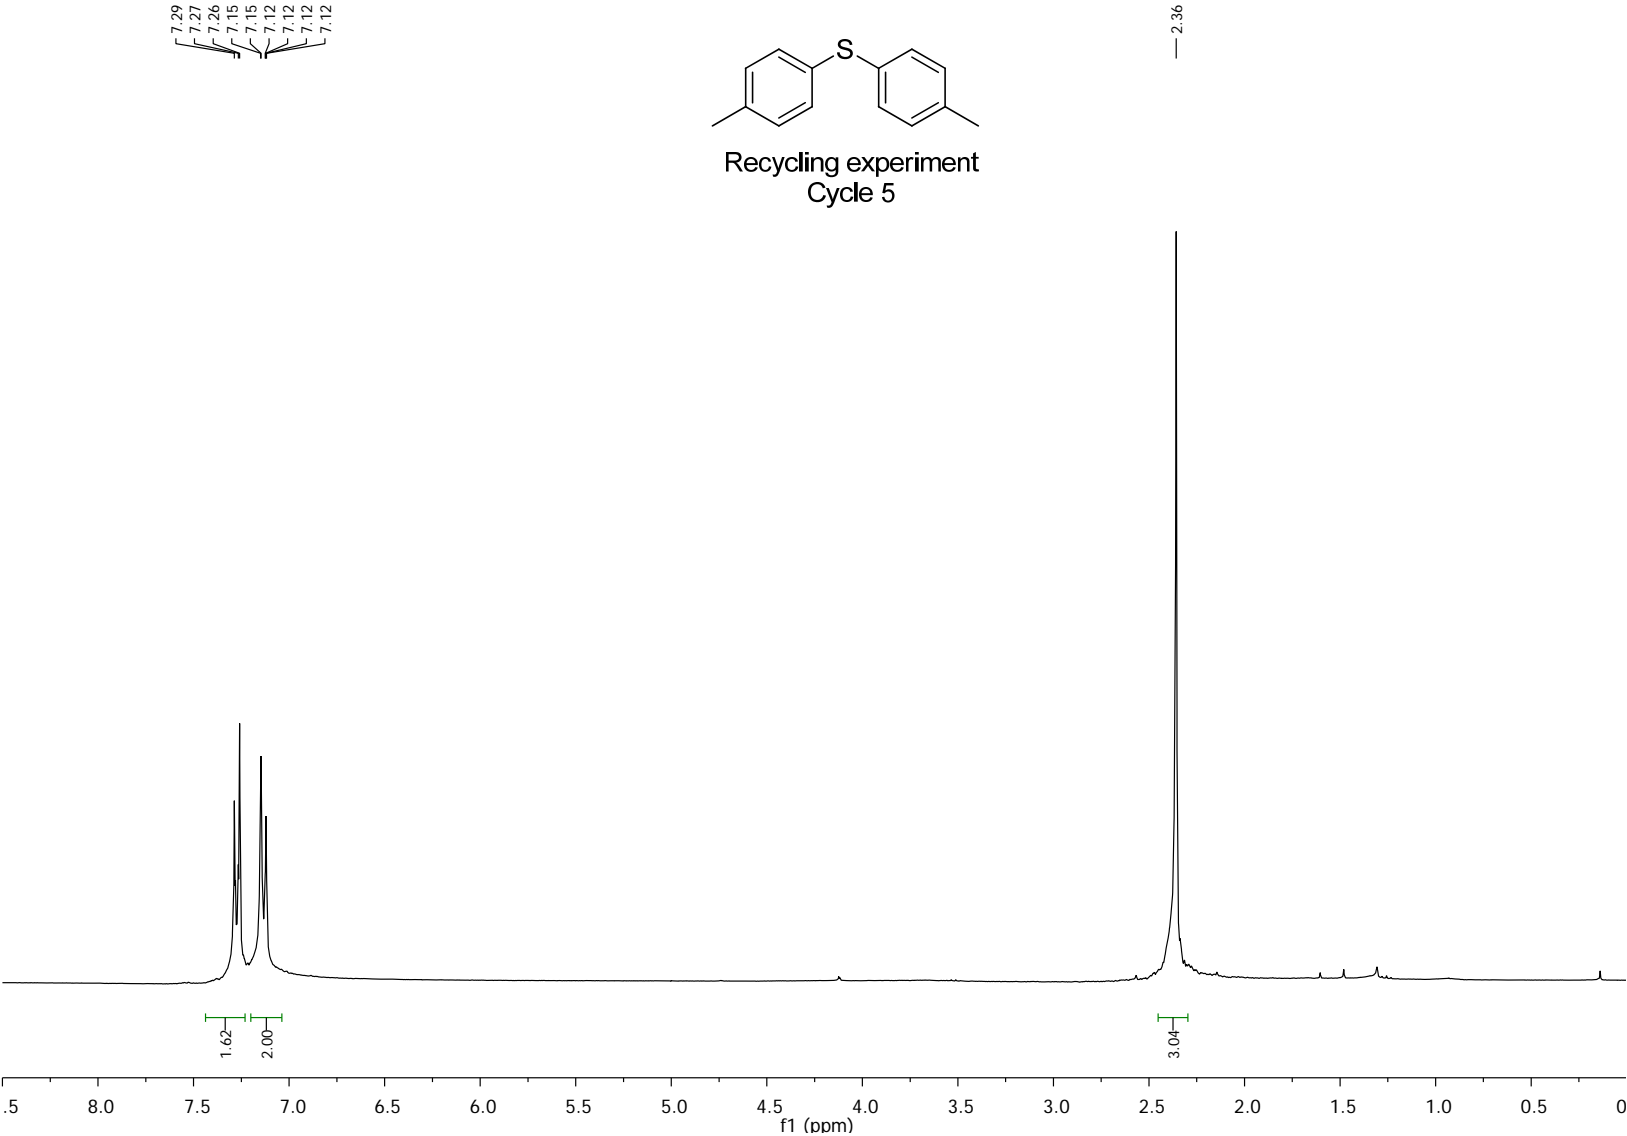

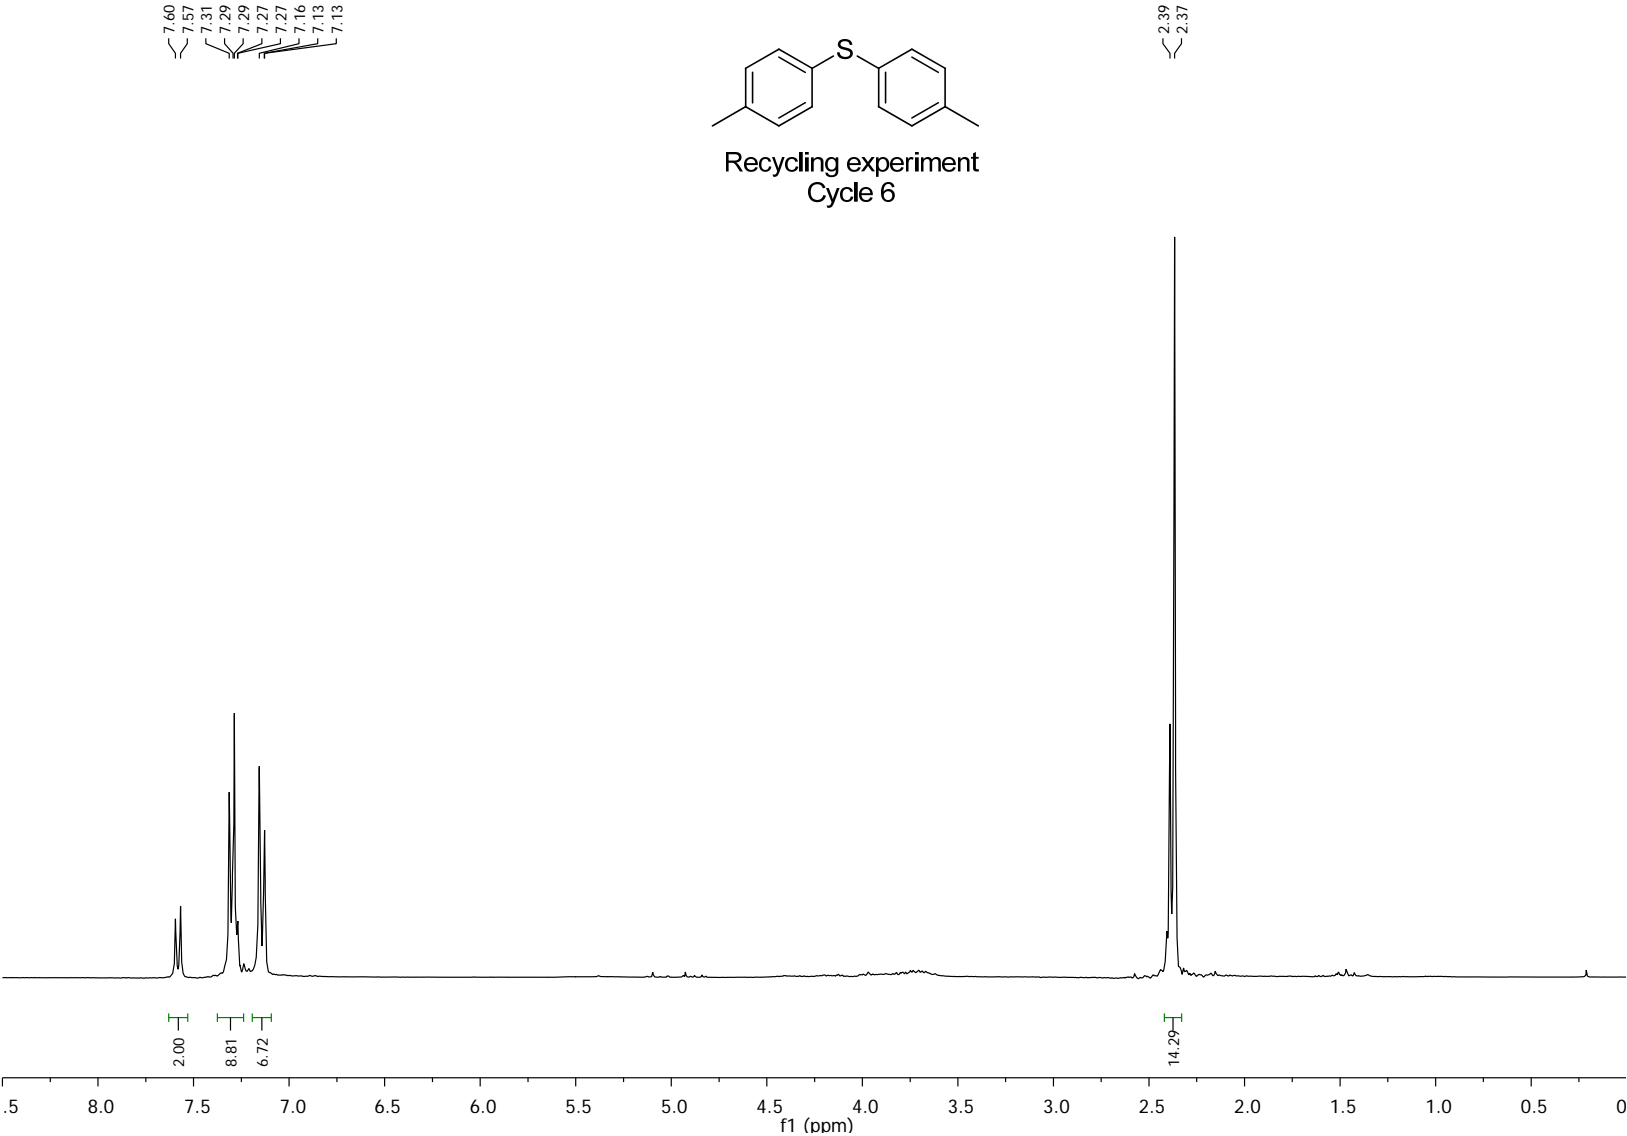

Supplement: c3gc36908k.pdf [file c3gc36908k.pdf]
